# Supplementary material
Source: PubMed Central journal article supplement (PMC3289123)
Supplement: suppmat.pdf [file suppmat.pdf]

## Supplementary Materials

### *Details of quality control*

Having discarded samples from participants 21, 23, and 35 due to insufficient RNA, we normalized the CEL files of the remaining 140 chipable samples with the RMA method using the APT software in three runs, one per RNA source. The quality control parameters of these samples are shown in Supplementary Table 13.

Since participant 45 did not yield sufficient RNA in its LCL sample, its PAX and PBMC samples were discarded. PBMC samples of participants 2 and 8 and PAX samples of participants 43 and 44 were found mislabeled by the inspection of Y chromosome probesets. These four samples were discarded. LCL sample of participant 18 was identical to that of participant 17, and LCL sample of participant 42 was identical to that of participant 43. Only LCL sample from participant 18 could be restored. We select only participants with samples having all probeset RLE mean of at most 0.75. This step removed samples from participants 37, 38, 40, 41, 46, and 47. We renormalized the 105 CEL files altogether from the remaining 35 patients.

### *Details of postnormalization*

There is an apparent systematic bias in gene expression values between PAX results and either PBMC or LCL (Supplementary Figure 1, left panel), which is manifested in a skew in RMA-normalized gene expression mean values across 35 samples for LCL *vs.* PAX. RMA normalization alone failed to normalize gene expression quantiles between LCL and PAX samples. This skew also appears in PBMC *vs.* PAX. This is likely arising from the differences in labeling protocol.

In order to address this bias, we examined further data normalization (“postnormalization”) with the S10 procedure<sup>(2)</sup> and quantile post-normalization (QPN). S10 is a variance-stabilizing and quantile-normalizing transform, while QPN is only a quantile-normalization transform. We will choose the transform that minimizing variance across participants.

Using QPN, we computed the mean value of each probeset per RNA source, yielding three sets of mean values. We chose PBMC as the reference distribution because its mean values correlate well with those of LCL and PAX (Spearman’s correlation = 0.8973 and 0.8565, respectively). Such selection is aimed to minimize drastic quantile correction. After the mean value of each gene for LCL and PAX was quantile-normalized against that of PBMC, its individual expression values were shifted by the difference between the original and normalized mean values.

For S10, we computed the anti-log of the RMA expression values, calculated the normal quantiles, then computed mean and standard deviations across samples, then fit a spline to the

standard deviation as a function of the mean. A variance-stabilizing transform function is computed from this smooth function, and then applied to the data. Finally, the log base 2 was computed on the normalized data.

After postnormalization, the QPN-transformed mean densities were identical to that of PBMC, while those S10-transformed were shown in Supplementary Figure 2. QPN mean differences between any two RNA sources are better correlated than those of S10 with those of the original. Some S10 mean differences lie slightly away from the line of identity. Both corrections yielded slightly deflated values for differences in mean values (Supplementary Table 14). The deflation induced by QPN method is minimal compared to that of by S10.

Using two-way ANOVA with RNA source and participant as fixed factors, we determined to use S10 because S10 minimizes variance across participants while normalizing the quantiles. We also found that the deflation rate to be of no concern since we declared significance based on fold change.

## Bibliography

1. **Connelly PW, Zinman B, Maguire GF, Mamakeesick M, Harris SB, Hegele RA, Retnakaran R, Hanley AJG.** Association of the novel cardiovascular risk factors paraoxonase 1 and cystatin C in type 2 diabetes. *J. Lipid Res* 50: 1216-1222, 2009.
2. **Munson PJ.** A consistency test for determining the significance of gene expression changes on replicate samples and two convenient variance-stabilizing transformations [Online]. *GeneLogic Workshop on Low Level Analysis of Affymetrix GeneChip Data*. [http://stat-www.berkeley.edu/users/terry/zarray/Affy/GL\\_Workshop/genelogic2001.html](http://stat-www.berkeley.edu/users/terry/zarray/Affy/GL_Workshop/genelogic2001.html).
3. **Peloso GM, Demissie S, Collins D, Mirel DB, Gabriel SB, Cupples LA, Robins SJ, Schaefer EJ, Brousseau ME.** Common genetic variation in multiple metabolic pathways influences susceptibility to low HDL-cholesterol and coronary heart disease. *J. Lipid Res* 51: 3524-3532, 2010.
4. **Waterworth DM, Ricketts SL, Song K, Chen L, Zhao JH, Ripatti S, Aulchenko YS, Zhang W, Yuan X, Lim N, Luan J, Ashford S, Wheeler E, Young EH, Hadley D, Thompson JR, Braund PS, Johnson T, Struchalin M, Surakka I, Luben R, Khaw K-T, Rodwell SA, Loos RJF, Boehholdt SM, Inouye M, Deloukas P, Elliott P, Schlessinger D, Sanna S, Scuteri A, Jackson A, Mohlke KL, Tuomilehto J, Roberts R, Stewart A, Kesäniemi YA, Mahley RW, Grundy SM, McArdle W, Cardon L, Waeber G, Vollenweider P, Chambers JC, Boehnke M, Abecasis GR, Salomaa V, Järvelin M-R, Ruukonen A, Barroso I, Epstein SE, Hakonarson HH, Rader DJ, Reilly MP, Wittteman JCM, Hall AS, Samani NJ, Strachan DP, Barter P, van Duijn CM, Kooner JS, Peltonen L, Wareham NJ, McPherson R, Mooser V, Sandhu MS.** Genetic variants influencing circulating lipid levels and risk of coronary artery disease. *Arterioscler. Thromb. Vasc. Biol* 30: 2264-2276, 2010.

## Figure Legends:

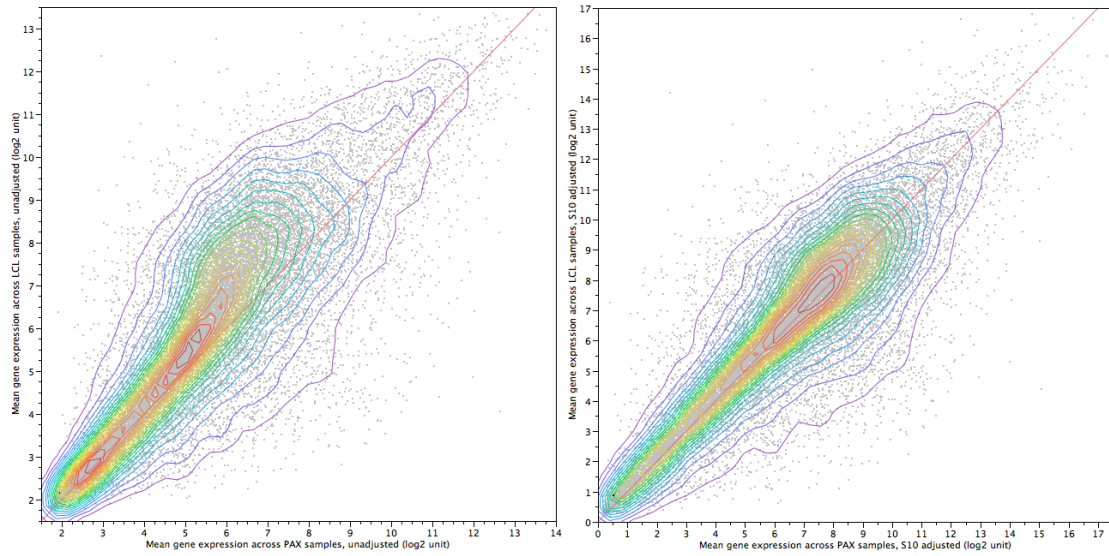

Supplementary Figure 1. Comparison of RMA-normalized gene expression mean values across 35 samples for LCL vs. PAX, before (left panel) and after (right panel) S10 postnormalization. RMA normalization alone failed to normalize gene expression quantiles between LCL and PAX samples. This skew also appears in PBMC vs. PAX. Diagonal lines are identity lines.

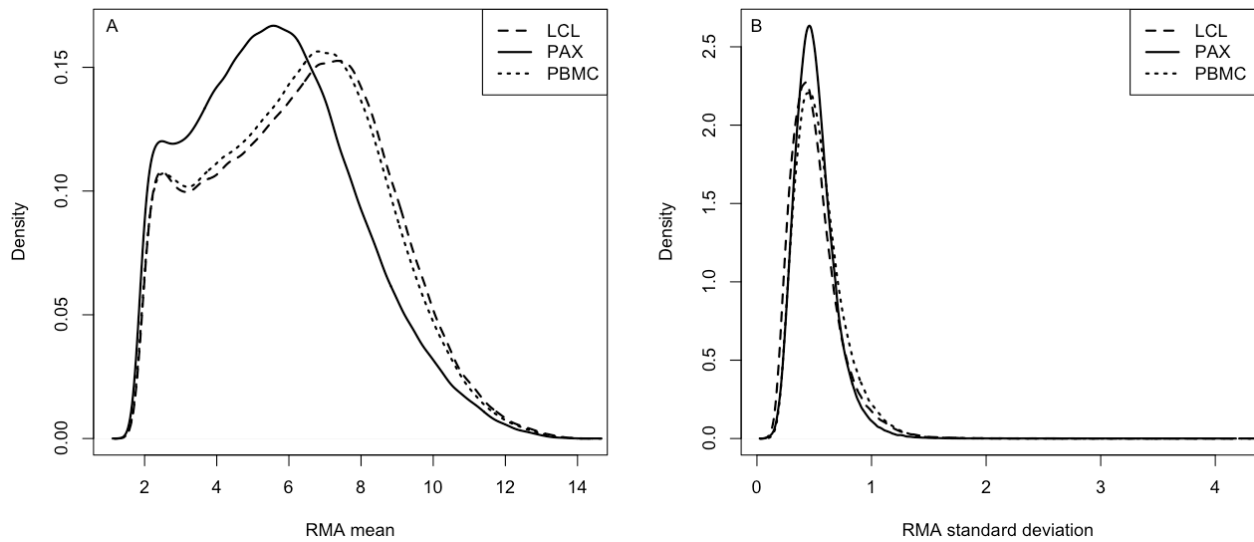

Supplementary Figure 2. (A) Mean and (B) standard deviation densities taken over samples ( $n=35$ ) across the probesets ( $n=287,329$ ) of the three RNA sources after S10 correction at an exon-probeset level on  $\log_2$  RMA scale.

Supplementary Table 1. Partial list of exons highly expressed in PAX.

| Rank <sup>a</sup> | Probeset ID | Gene Symbol | Chr. | Description                                                                                                                                        | Mean PAX <sup>b</sup> | PAX / LCL <sup>c</sup> | PAX / PBM <sup>c</sup> | Min FC <sup>d</sup> | Det. exon <sup>e</sup> | Tot. exon <sup>f</sup> |
|-------------------|-------------|-------------|------|----------------------------------------------------------------------------------------------------------------------------------------------------|-----------------------|------------------------|------------------------|---------------------|------------------------|------------------------|
| 1                 | 2648705     | MME         | 3    | membrane metallo-endopeptidase                                                                                                                     | 13.5                  | 914                    | 605                    | 605                 | 15                     | 29                     |
| 3                 | 3646486     | UBN1        | 16   | ubiquitin 1                                                                                                                                        | 13.9                  | 705                    | 507                    | 507                 | 4                      | 27                     |
| 4                 | 4009851     | ALAS2       | X    | aminolevulinic acid synthase 2                                                                                                                     | 16                    | 1076                   | 487                    | 487                 | 12                     | 16                     |
| 5                 | 2787959     | GYPB        | 4    | glycophorin B (MNS blood group)                                                                                                                    | 13.6                  | 383                    | 401                    | 383                 | 2                      | 9                      |
| 6                 | 3629207     | OAZ2        | 15   | ornithine decarboxylase antizyme 2 radial spoke head 10 homolog B                                                                                  | 17.6                  | 642                    | 380                    | 380                 | 2                      | 11                     |
| 7                 | 3037101     | RSPH10B2    | 7    | (Chlamydomonas)                                                                                                                                    | 12.5                  | 445                    | 336                    | 336                 | 1                      | 8                      |
| 8                 | 2527593     | CXCR2       | 2    | chemokine (C-X-C motif) receptor 2                                                                                                                 | 15                    | 5360                   | 321                    | 321                 | 7                      | 10                     |
| 10                | 3838227     | SNRNP70     | 19   | small nuclear ribonucleoprotein 70kDa (U1)                                                                                                         | 14.8                  | 314                    | 390                    | 314                 | 2                      | 14                     |
| 11                | 3890137     | C2orf108    | 20   | chromosome 20 open reading frame 108                                                                                                               | 11.5                  | 481                    | 307                    | 307                 | 1                      | 10                     |
| 12                | 3771677     | C2          | 17   | ST6 (alpha-N-acetylneuraminyl-2,3-beta-galactosyl-1,3)-N-acetylgalactosaminide alpha-2,6-sialyltransferase 2                                       | 12.6                  | 599                    | 284                    | 284                 | 2                      | 15                     |
| 13                | 3756593     | KRT23       | 17   | keratin 23 (histone deacetylase inducible)                                                                                                         | 12.1                  | 437                    | 282                    | 282                 | 3                      | 13                     |
| 14                | 3990530     | SASH3       | X    | SAM and SH3 domain containing 3                                                                                                                    | 13.2                  | 643                    | 267                    | 267                 | 2                      | 13                     |
| 15                | 3864505     | ZNF428      | 19   | zinc finger protein 428                                                                                                                            | 12.9                  | 394                    | 264                    | 264                 | 4                      | 11                     |
| 16                | 3457164     | CD63        | 12   | CD63 molecule                                                                                                                                      | 16.8                  | 363                    | 257                    | 257                 | 6                      | 10                     |
| 17                | 3304013     | MGEA5       | 10   | meningioma expressed antigen 5 (hyaluronidase)                                                                                                     | 11.5                  | 320                    | 252                    | 252                 | 6                      | 26                     |
| 18                | 3475785     | GPR109A     | 12   | G protein-coupled receptor 109A                                                                                                                    | 12.3                  | 481                    | 222                    | 222                 | 6                      | 11                     |
| 19                | 3873715     | STK35       | 20   | serine/threonine kinase 35                                                                                                                         | 12.6                  | 305                    | 218                    | 218                 | 1                      | 6                      |
| 21                | 3334570     | CCDC88B     | 11   | coiled-coil domain containing 88B                                                                                                                  | 12                    | 379                    | 213                    | 213                 | 1                      | 41                     |
| 22                | 3724534     | MYL4        | 17   | myosin, light chain 4, alkali; atrial, embryonic SWI/SNF related, matrix associated, actin dependent regulator of chromatin, subfamily d, member 2 | 12.4                  | 384                    | 202                    | 202                 | 3                      | 13                     |
| 23                | 3766416     | SMARCD2     | 17   | member 2                                                                                                                                           | 13.6                  | 277                    | 199                    | 199                 | 1                      | 21                     |
| 24                | 3292635     | RUFY2       | 10   | RUN and FYVE domain containing 2                                                                                                                   | 11.7                  | 193                    | 259                    | 193                 | 1                      | 24                     |
| 25                | 3453838     | TUBA1A      | 12   | tubulin, alpha 1a cytochrome P450, family 4, subfamily F,                                                                                          | 13.9                  | 938                    | 193                    | 193                 | 2                      | 11                     |
| 26                | 3823333     | CYP4F3      | 19   | polypeptide 3                                                                                                                                      | 11.3                  | 244                    | 188                    | 188                 | 7                      | 17                     |
| 27                | 3360408     | HBB         | 11   | hemoglobin, beta                                                                                                                                   | 17.6                  | 8261                   | 186                    | 186                 | 9                      | 9                      |
| 28                | 4007645     | OTUD5       | X    | OTU domain containing 5                                                                                                                            | 11.5                  | 254                    | 185                    | 185                 | 1                      | 19                     |
| 31                | 3359532     | CARS        | 11   | cysteinyl-tRNA synthetase                                                                                                                          | 14.1                  | 205                    | 175                    | 175                 | 4                      | 27                     |
| 32                | 2682274     | PROK2       | 3    | prokineticin 2 eukaryotic translation elongation factor 1 alpha 1                                                                                  | 13.2                  | 1302                   | 175                    | 175                 | 2                      | 5                      |
| 33                | 3192641     | EEF1A1      | 9    | pseudogene 9                                                                                                                                       | 16.4                  | 173                    | 187                    | 173                 | 1                      | 43                     |
| 36                | 3360450     | HBG1        | 11   | hemoglobin, gamma A                                                                                                                                | 13.3                  | 1658                   | 166                    | 166                 | 5                      | 9                      |
| 37                | 3836037     | SFRS16      | 19   | splicing factor, arginine/serine-rich 16                                                                                                           | 10.9                  | 206                    | 162                    | 162                 | 1                      | 29                     |
| 38                | 3846784     | UBXN6       | 19   | UBX domain protein 6                                                                                                                               | 10.6                  | 202                    | 162                    | 162                 | 2                      | 17                     |
| 39                | 2845979     | LPCAT1      | 5    | lysophosphatidylcholine acyltransferase 1                                                                                                          | 10.1                  | 160                    | 170                    | 160                 | 2                      | 22                     |
| 40                | 3090013     | SLC25A37    | 8    | solute carrier family 25, member 37                                                                                                                | 15.7                  | 194                    | 152                    | 152                 | 15                     | 17                     |
| 42                | 3676181     | HAGH        | 16   | hydroxyacylglutathione hydrolase cytochrome P450, family 4, subfamily F,                                                                           | 15.1                  | 408                    | 150                    | 150                 | 2                      | 14                     |
| 43                | 3823330     | CYP4F2      | 19   | polypeptide 3                                                                                                                                      | 14.8                  | 156                    | 149                    | 149                 | 2                      | 21                     |
| 45                | 2599904     | C2orf24     | 2    | chromosome 2 open reading frame 24                                                                                                                 | 14.1                  | 226                    | 145                    | 145                 | 4                      | 16                     |
| 46                | 3901667     | C2orf3      | 20   | chromosome 20 open reading frame 3 frequently rearranged in advanced T-cell lymphomas 2                                                            | 12.3                  | 180                    | 143                    | 143                 | 3                      | 16                     |
| 47                | 3302230     | FRAT2       | 10   | lymphomas 2                                                                                                                                        | 11.3                  | 539                    | 140                    | 140                 | 1                      | 4                      |
| 48                | 3937171     | C22orf25    | 22   | chromosome 22 open reading frame 25                                                                                                                | 12.3                  | 336                    | 137                    | 137                 | 2                      | 14                     |
| 49                | 2907174     | HCRP1       | 6    | hepatocellular carcinoma-related HCRP1                                                                                                             | 10.4                  | 156                    | 136                    | 136                 | 1                      | 3                      |
| 50                | 3416506     | HNRNPA1     | 12   | heterogeneous nuclear ribonucleoprotein A1                                                                                                         | 10.5                  | 160                    | 135                    | 135                 | 3                      | 18                     |
| 51                | 2831969     | IK          | 5    | IK cytokine, down-regulator of HLA II                                                                                                              | 13.8                  | 149                    | 134                    | 134                 | 10                     | 21                     |
| 52                | 3772662     | TIMP2       | 17   | TIMP metalloproteinase inhibitor 2                                                                                                                 | 11.9                  | 806                    | 132                    | 132                 | 2                      | 9                      |
| 53                | 2927889     | CCDC28A     | 6    | coiled-coil domain containing 28A inosine triphosphatase (nucleoside triphosphate                                                                  | 13.1                  | 282                    | 132                    | 132                 | 8                      | 11                     |
| 55                | 3874280     | ITPA        | 20   | pyrophosphatase)                                                                                                                                   | 10.1                  | 131                    | 164                    | 131                 | 3                      | 14                     |

| Rank <sup>a</sup> | Probeset ID | Gene Symbol | Chr. | Description                                                                                | Mean PAX <sup>b</sup> | PAX / LCL <sup>c</sup> | PAX / PBMC <sup>c</sup> | Min FC <sup>d</sup> | Det. exon s <sup>e</sup> | Tot. no. exon s <sup>f</sup> |
|-------------------|-------------|-------------|------|--------------------------------------------------------------------------------------------|-----------------------|------------------------|-------------------------|---------------------|--------------------------|------------------------------|
| 57                | 3815869     | DAZAP1      | 19   | DAZ associated protein 1                                                                   | 11.1                  | 177                    | 129                     | 129                 | 2                        | 19                           |
| 59                | 4026670     | BCAP31      | X    | B-cell receptor-associated protein 31                                                      | 14.6                  | 372                    | 129                     | 129                 | 1                        | 12                           |
| 60                | 3506942     | GTF3A       | 13   | mitochondrial translational initiation factor 3 excision repair cross-complementing rodent | 13.3                  | 248                    | 128                     | 128                 | 5                        | 20                           |
| 61                | 3499679     | ERCC5       | 13   | repair deficiency, complementation group 5                                                 | 9.8                   | 226                    | 127                     | 127                 | 4                        | 26                           |
| 62                | 2324119     | PINK1       | 1    | PTEN induced putative kinase 1                                                             | 13.3                  | 190                    | 127                     | 127                 | 5                        | 17                           |
| 65                | 2396422     | MASP2       | 1    | mannan-binding lectin serine peptidase 2                                                   | 11.8                  | 155                    | 122                     | 122                 | 2                        | 15                           |
| 66                | 2764199     | SEL1L3      | 4    | sel-1 suppressor of lin-12-like 3 ( <i>C. elegans</i> )                                    | 13.3                  | 193                    | 121                     | 121                 | 1                        | 35                           |
| 67                | 3190551     | GLE1        | 9    | GLE1 RNA export mediator homolog (yeast)                                                   | 12.1                  | 121                    | 121                     | 121                 | 1                        | 25                           |
| 69                | 3870450     | VSTM1       | 19   | V-set and transmembrane domain containing 1                                                | 11.7                  | 386                    | 117                     | 117                 | 1                        | 11                           |
| 70                | 3475800     | GPR109B     | 12   | G protein-coupled receptor 109B                                                            | 13.8                  | 171                    | 117                     | 117                 | 1                        | 4                            |
| 71                | 3203491     | BAG1        | 9    | BCL2-associated athanogene ATP-binding cassette, sub-family A (ABC1), member 1             | 14.5                  | 116                    | 149                     | 116                 | 11                       | 15                           |
| 74                | 3218538     | ABCA1       | 9    | member 1                                                                                   | 10.7                  | 289                    | 114                     | 114                 | 7                        | 62                           |
| 75                | 2435006     | SELENBP1    | 1    | selenium binding protein 1                                                                 | 12.3                  | 202                    | 114                     | 114                 | 6                        | 16                           |
| 76                | 3882710     | CHMP4B      | 20   | chromatin modifying protein 4B                                                             | 10.1                  | 192                    | 111                     | 111                 | 1                        | 14                           |
| 77                | 3479359     | GOLGA3      | 12   | golgin A3                                                                                  | 11.8                  | 110                    | 116                     | 110                 | 1                        | 38                           |
| 79                | 2603071     | SP110       | 2    | SP110 nuclear body protein eukaryotic translation initiation factor 3, subunit             | 12.6                  | 109                    | 114                     | 109                 | 3                        | 24                           |
| 80                | 3959632     | EIF3D       | 22   | D ribosomal protein S6 kinase, 70kDa, polypeptide                                          | 13.4                  | 107                    | 115                     | 107                 | 2                        | 17                           |
| 81                | 3337099     | RPS6KB2     | 11   | 2 cyclin-dependent kinase inhibitor 2D (p19, inhibits CDK4)                                | 12.7                  | 141                    | 106                     | 106                 | 2                        | 18                           |
| 83                | 3850446     | CDKN2D      | 19   | inhibits CDK4)                                                                             | 13.6                  | 520                    | 105                     | 105                 | 1                        | 4                            |
| 85                | 3717038     | RPL41       | 17   | ribosomal protein L41                                                                      | 18.4                  | 150                    | 104                     | 104                 | 3                        | 11                           |
| 87                | 3180029     | PHF2        | 9    | PHD finger protein 2                                                                       | 11.4                  | 252                    | 104                     | 104                 | 2                        | 34                           |
| 88                | 2317451     | TPRG1L      | 1    | tumor protein p63 regulated 1-like                                                         | 10                    | 202                    | 104                     | 104                 | 2                        | 10                           |
| 89                | 3645314     | SRRM2       | 16   | serine/arginine repetitive matrix 2                                                        | 8.5                   | 103                    | 123                     | 103                 | 3                        | 43                           |
| 90                | 2354006     | FAM46C      | 1    | family with sequence similarity 46, member C                                               | 11.7                  | 103                    | 129                     | 103                 | 3                        | 7                            |
| 92                | 4045599     | S100A4      | 1    | S100 calcium binding protein A4 bromodomain adjacent to zinc finger domain,                | 16.7                  | 2203                   | 102                     | 102                 | 3                        | 8                            |
| 93                | 2583056     | BAZ2B       | 2    | 2B                                                                                         | 10.3                  | 154                    | 101                     | 101                 | 25                       | 50                           |
| 94                | 3214453     | NFIL3       | 9    | nuclear factor, interleukin 3 regulated                                                    | 11                    | 261                    | 101                     | 101                 | 3                        | 5                            |
| 95                | 2714308     | PCGF3       | 4    | polycomb group ring finger 3                                                               | 11.2                  | 122                    | 101                     | 101                 | 1                        | 24                           |
| 96                | 2622431     | RBM6        | 3    | RNA binding motif protein 6                                                                | 10.2                  | 100                    | 102                     | 100                 | 5                        | 31                           |
| 97                | 3758159     | BECN1       | 17   | beclin 1, autophagy related poly (ADP-ribose) polymerase family, member                    | 12.9                  | 146                    | 99                      | 99                  | 1                        | 13                           |
| 98                | 2639118     | PARP14      | 3    | 14                                                                                         | 13.7                  | 99                     | 109                     | 99                  | 4                        | 28                           |
| 99                | 3942887     | LIMK2       | 22   | LIM domain kinase 2                                                                        | 13.9                  | 236                    | 98                      | 98                  | 3                        | 29                           |
| 100               | 2329021     | RBBP4       | 1    | retinoblastoma binding protein 4                                                           | 13.2                  | 98                     | 107                     | 98                  | 2                        | 20                           |
| 102               | 2564827     | LOC150759   | 2    | ankyrin repeat domain 36B                                                                  | 8.4                   | 156                    | 98                      | 98                  | 6                        | 9                            |
| 103               | 3608050     | NGRN        | 15   | tubulin tyrosine ligase-like family, member 13                                             | 12.9                  | 132                    | 97                      | 97                  | 4                        | 14                           |
| 104               | 3780318     | RNMT        | 18   | RNA (guanine-7-) methyltransferase                                                         | 12.4                  | 97                     | 157                     | 97                  | 1                        | 18                           |
| 105               | 3122766     | DEFA3       | 8    | defensin, alpha 3, neutrophil-specific                                                     | 14.9                  | 1042                   | 97                      | 97                  | 9                        | 12                           |
| 108               | 3725022     | CDK5RAP3    | 17   | CDK5 regulatory subunit associated protein 3                                               | 12                    | 109                    | 97                      | 97                  | 5                        | 20                           |
| 111               | 2892200     | WRNIP1      | 6    | Werner helicase interacting protein 1                                                      | 11.9                  | 186                    | 95                      | 95                  | 2                        | 20                           |
| 112               | 3375864     | MTA2        | 11   | metastasis associated 1 family, member 2                                                   | 12                    | 95                     | 122                     | 95                  | 2                        | 23                           |
| 113               | 3248912     | NRBF2       | 10   | nuclear receptor binding factor 2                                                          | 12.1                  | 166                    | 94                      | 94                  | 2                        | 10                           |
| 114               | 2522813     | STRADB      | 2    | STE20-related kinase adaptor beta BMS1 homolog, ribosome assembly protein                  | 13.3                  | 94                     | 98                      | 94                  | 7                        | 17                           |
| 115               | 3243750     | BMS1        | 10   | (yeast) chemokine (C-X-C motif) receptor 2                                                 | 14                    | 94                     | 131                     | 94                  | 2                        | 31                           |
| 116               | 2599318     | CXCR1       | 2    | pseudogene 1                                                                               | 11.1                  | 189                    | 93                      | 93                  | 8                        | 8                            |
| 117               | 3449370     | CAPRIN2     | 12   | caprin family member 2                                                                     | 9.9                   | 106                    | 93                      | 93                  | 6                        | 34                           |

| Rank <sup>a</sup> | Probeset ID | Gene Symbol | Chr. | Description                                                                                                                        | Mean PAX <sup>b</sup> | PAX / LCL <sup>c</sup> | PAX / PBMC <sup>c</sup> | Min FC <sup>d</sup> | Det. exon <sup>e</sup> | Tot. no. exon <sup>f</sup> |
|-------------------|-------------|-------------|------|------------------------------------------------------------------------------------------------------------------------------------|-----------------------|------------------------|-------------------------|---------------------|------------------------|----------------------------|
|                   |             |             |      | Fc fragment of IgG, low affinity IIIa, receptor                                                                                    |                       |                        |                         |                     |                        |                            |
| 118               | 2440951     | FCGR3A      | 1    | (CD16a)                                                                                                                            | 10                    | 314                    | 93                      | 93                  | 2                      | 15                         |
| 120               | 3941955     | EWSR1       | 22   | Ewing sarcoma breakpoint region 1                                                                                                  | 14.3                  | 93                     | 135                     | 93                  | 4                      | 24                         |
| 121               | 2694398     | RPN1        | 3    | ribophorin I                                                                                                                       | 13.4                  | 93                     | 110                     | 93                  | 2                      | 14                         |
| 123               | 2485476     | AFTPH       | 2    | aftiphilin                                                                                                                         | 11.7                  | 102                    | 91                      | 91                  | 1                      | 17                         |
| 125               | 2349435     | AMY1A       | 1    | amylase, alpha 2B (pancreatic)                                                                                                     | 12.1                  | 323                    | 91                      | 91                  | 11                     | 71                         |
| 126               | 3959415     | APOL2       | 22   | apolipoprotein L, 2                                                                                                                | 10.5                  | 90                     | 101                     | 90                  | 1                      | 12                         |
| 128               | 3458579     | ARHGAP9     | 12   | Rho GTPase activating protein 9                                                                                                    | 10.2                  | 90                     | 94                      | 90                  | 3                      | 23                         |
| 129               | 3642682     | HBA1        | 16   | hemoglobin, alpha 1                                                                                                                | 18                    | 644                    | 89                      | 89                  | 13                     | 14                         |
| 130               | 2981913     | EZR         | 6    | ezrin                                                                                                                              | 13.2                  | 89                     | 97                      | 89                  | 2                      | 25                         |
| 134               | 3712054     | UBB         | 17   | ubiquitin B                                                                                                                        | 17                    | 88                     | 126                     | 88                  | 2                      | 7                          |
| 135               | 3966626     | SFRS17A     | X    | splicing factor, arginine/serine-rich 17A<br>potassium inwardly-rectifying channel,<br>subfamily J, member 15                      | 10.8                  | 94                     | 87                      | 87                  | 2                      | 28                         |
| 136               | 3920876     | KCNJ15      | 21   | subfamily J, member 15                                                                                                             | 11.8                  | 356                    | 87                      | 87                  | 7                      | 10                         |
| 137               | 3842302     | ZNF581      | 19   | zinc finger protein 581                                                                                                            | 11.4                  | 114                    | 86                      | 86                  | 1                      | 10                         |
| 138               | 3643270     | RHOT2       | 16   | ras homolog gene family, member T2                                                                                                 | 9.9                   | 126                    | 86                      | 86                  | 3                      | 25                         |
| 139               | 2622534     | RBM5        | 3    | RNA binding motif protein 5                                                                                                        | 14.1                  | 131                    | 85                      | 85                  | 9                      | 29                         |
| 142               | 2488234     | ZNF638      | 2    | zinc finger protein 638                                                                                                            | 8.9                   | 85                     | 91                      | 85                  | 9                      | 43                         |
| 144               | 2999835     | YKT6        | 7    | YKT6 v-SNARE homolog ( <i>S. cerevisiae</i> )                                                                                      | 10.2                  | 120                    | 85                      | 85                  | 1                      | 13                         |
| 147               | 3221546     | CDC26       | 9    | cell division cycle 26 homolog ( <i>S. cerevisiae</i> )<br>potassium voltage-gated channel, subfamily H<br>(eag-related), member 7 | 11.8                  | 84                     | 99                      | 84                  | 3                      | 9                          |
| 148               | 2584267     | KCNH7       | 2    | (eag-related), member 7                                                                                                            | 10.5                  | 106                    | 84                      | 84                  | 1                      | 23                         |
| 149               | 3795684     | THOC1       | 18   | THO complex 1                                                                                                                      | 9.7                   | 83                     | 86                      | 83                  | 2                      | 23                         |
| 150               | 2451595     | CHI3L1      | 1    | chitinase 3-like 1 (cartilage glycoprotein-39)                                                                                     | 10.7                  | 83                     | 88                      | 83                  | 4                      | 14                         |
| 151               | 3855012     | ELL         | 19   | elongation factor RNA polymerase II                                                                                                | 11.4                  | 83                     | 136                     | 83                  | 2                      | 20                         |
| 152               | 2334302     | UROD        | 1    | uroporphyrinogen decarboxylase                                                                                                     | 10.3                  | 82                     | 88                      | 82                  | 2                      | 12                         |
| 154               | 3392841     | BUD13       | 11   | BUD13 homolog ( <i>S. cerevisiae</i> )                                                                                             | 11.9                  | 82                     | 103                     | 82                  | 3                      | 17                         |
| 155               | 2363796     | HSPA6       | 1    | heat shock 70kDa protein 6 (HSP70B')                                                                                               | 12                    | 179                    | 82                      | 82                  | 4                      | 8                          |
| 157               | 2347752     | TMEM56      | 1    | transmembrane protein 56<br>ankyrin repeat and zinc finger domain                                                                  | 10.3                  | 82                     | 80                      | 80                  | 5                      | 7                          |
| 158               | 2528383     | ANKZF1      | 2    | containing 1<br>biliverdin reductase B (flavin reductase                                                                           | 10.5                  | 80                     | 82                      | 80                  | 2                      | 21                         |
| 159               | 3862662     | BLVRB       | 19   | (NADPH))<br>telomeric repeat binding factor 2, interacting                                                                         | 11.6                  | 139                    | 79                      | 79                  | 1                      | 7                          |
| 160               | 3669110     | TERF2IP     | 16   | protein<br>BCL2/adenovirus E1B 19kDa interacting protein                                                                           | 14.8                  | 85                     | 79                      | 79                  | 1                      | 9                          |
| 162               | 3091041     | BNIP3L      | 8    | 3-like                                                                                                                             | 12                    | 148                    | 79                      | 79                  | 2                      | 15                         |
| 163               | 2939215     | TUBB2A      | 6    | tubulin, beta 2A                                                                                                                   | 11.5                  | 78                     | 418                     | 78                  | 1                      | 9                          |
| 165               | 2709783     | BCL6        | 3    | B-cell CLL/lymphoma 6                                                                                                              | 12                    | 379                    | 78                      | 78                  | 2                      | 16                         |
| 166               | 3261523     | NOLC1       | 10   | nucleolar and coiled-body phosphoprotein 1                                                                                         | 9.3                   | 78                     | 84                      | 78                  | 1                      | 23                         |
| 168               | 3824220     | DDA1        | 19   | DET1 and DDB1 associated 1<br>phosphatidylinositol binding clathrin assembly                                                       | 16.4                  | 77                     | 96                      | 77                  | 1                      | 8                          |
| 171               | 3385181     | PICALM      | 11   | protein                                                                                                                            | 9.3                   | 109                    | 76                      | 76                  | 1                      | 2                          |
| 172               | 3428710     | CHPT1       | 12   | choline phosphotransferase 1<br>solute carrier family 23 (nucleobase                                                               | 8.7                   | 88                     | 76                      | 76                  | 3                      | 17                         |
| 173               | 3896079     | SLC23A2     | 20   | transporters), member 2                                                                                                            | 9.3                   | 113                    | 76                      | 76                  | 1                      | 31                         |
| 174               | 2888116     | THOC3       | 5    | THO complex 3                                                                                                                      | 13                    | 76                     | 87                      | 76                  | 2                      | 14                         |
| 175               | 3548051     | PRO1768     | 14   | PRO1768                                                                                                                            | 10.9                  | 80                     | 76                      | 76                  | 2                      | 3                          |
| 177               | 2577706     | ZRANB3      | 2    | zinc finger, RAN-binding domain containing 3                                                                                       | 11.2                  | 75                     | 76                      | 75                  | 1                      | 19                         |
| 178               | 3907653     | NCOA5       | 20   | nuclear receptor coactivator 5                                                                                                     | 9.6                   | 121                    | 75                      | 75                  | 1                      | 18                         |
| 181               | 2393671     | KIAA0495    | 1    | KIAA0495                                                                                                                           | 13.7                  | 89                     | 74                      | 74                  | 2                      | 17                         |
| 182               | 2974636     | VNN2        | 6    | vanin 2<br>purinergic receptor P2X, ligand-gated ion                                                                               | 11.1                  | 190                    | 74                      | 74                  | 6                      | 17                         |
| 183               | 3434796     | P2RX4       | 12   | channel, 4<br>signal transducer and activator of transcription 2,                                                                  | 8.7                   | 120                    | 74                      | 74                  | 1                      | 15                         |
| 184               | 3457753     | STAT2       | 12   | 113kDa                                                                                                                             | 10.6                  | 74                     | 75                      | 74                  | 1                      | 26                         |

| Rank <sup>a</sup> | Probeset ID | Gene Symbol | Chr. | Description                                                                      | Mean PAX <sup>b</sup> | PAX / LCL <sup>c</sup> | PAX / PBMC <sup>c</sup> | Min FC <sup>d</sup> | Det. exon s <sup>e</sup> | Tot. no. exon s <sup>f</sup> |
|-------------------|-------------|-------------|------|----------------------------------------------------------------------------------|-----------------------|------------------------|-------------------------|---------------------|--------------------------|------------------------------|
| 185               | 3770564     | ATP5H       | 17   | ATP synthase, H+ transporting, mitochondrial F0 complex, subunit d               | 10.2                  | 85                     | 73                      | 73                  | 2                        | 7                            |
| 187               | 2406785     | CSF3R       | 1    | colony stimulating factor 3 receptor (granulocyte)                               | 13.2                  | 613                    | 72                      | 72                  | 2                        | 28                           |
| 188               | 2350304     | PRPF38B     | 1    | PRP38 pre-mRNA processing factor 38 (yeast)                                      | 11.9                  | 72                     | 83                      | 72                  | 6                        | 17                           |
| 189               | 3453775     | LMBRIL      | 12   | domain containing B                                                              | 10.5                  | 113                    | 72                      | 72                  | 2                        | 26                           |
| 193               | 2814456     | SMN1        | 5    | limb region 1 homolog (mouse)-like                                               | 10.9                  | 71                     | 76                      | 71                  | 3                        | 31                           |
| 194               | 3227071     | PTGES       | 9    | survival of motor neuron 1, telomeric                                            | 11.4                  | 85                     | 71                      | 71                  | 1                        | 9                            |
| 195               | 3730970     | PSMC5       | 17   | prostaglandin E synthase                                                         | 14.7                  | 71                     | 83                      | 71                  | 6                        | 13                           |
| 196               | 3456667     | NFE2        | 12   | proteasome (prosome, macropain) 26S subunit, ATPase, 5                           | 12.4                  | 559                    | 70                      | 70                  | 2                        | 6                            |
| 197               | 3226370     | CIZ1        | 9    | nuclear factor (erythroid-derived 2), 45kDa                                      | 10.3                  | 77                     | 70                      | 70                  | 2                        | 32                           |
| 198               | 3633554     | IMP3        | 15   | CDKN1A interacting zinc finger protein 1                                         | 12.6                  | 70                     | 82                      | 70                  | 2                        | 4                            |
| 199               | 3525703     | ANKRD10     | 13   | IMP3, U3 small nucleolar ribonucleoprotein, homolog (yeast)                      | 11                    | 70                     | 119                     | 70                  | 4                        | 20                           |
| 200               | 3434464     | RNF10       | 12   | ankyrin repeat domain 10                                                         | 11.3                  | 90                     | 70                      | 70                  | 5                        | 26                           |
| 201               | 3360419     | HBD         | 11   | ring finger protein 10                                                           | 9.9                   | 144                    | 70                      | 70                  | 5                        | 7                            |
| 202               | 2907832     | CUL9        | 6    | hemoglobin, delta                                                                | 8.5                   | 71                     | 70                      | 70                  | 2                        | 51                           |
| 203               | 3901697     | ACSS1       | 20   | cullin 9                                                                         | 12.4                  | 96                     | 70                      | 70                  | 2                        | 23                           |
| 204               | 3444253     | CSDA        | 12   | acyl-CoA synthetase short-chain family member 1                                  | 9.8                   | 72                     | 69                      | 69                  | 3                        | 7                            |
| 206               | 3399624     | THYN1       | 11   | cold shock domain protein A                                                      | 12.7                  | 93                     | 69                      | 69                  | 1                        | 1                            |
| 207               | 3735829     | SEC14L1     | 17   | thymocyte nuclear protein 1                                                      | 15.1                  | 69                     | 96                      | 69                  | 6                        | 29                           |
| 212               | 3945932     | ATF4        | 22   | SEC14-like 1 (S. cerevisiae)                                                     | 14.1                  | 68                     | 76                      | 68                  | 3                        | 13                           |
| 213               | 3235445     | SEC61A2     | 10   | activating transcription factor 4 (tax-responsive enhancer element B67)          | 11.6                  | 70                     | 68                      | 68                  | 7                        | 17                           |
| 215               | 3874475     | CDC25B      | 20   | Sec61 alpha 2 subunit (S. cerevisiae)                                            | 12.9                  | 370                    | 67                      | 67                  | 3                        | 27                           |
| 216               | 3057522     | A           | 7    | cell division cycle 25 homolog B (S. pombe)                                      | 13.1                  | 76                     | 67                      | 67                  | 1                        | 17                           |
| 217               | 3654987     | LAT         | 16   | transmembrane protein 120A                                                       | 13.2                  | 322                    | 67                      | 67                  | 1                        | 17                           |
| 218               | 3621043     | EPB42       | 15   | linker for activation of T cells                                                 | 12.1                  | 135                    | 67                      | 67                  | 4                        | 17                           |
| 220               | 2701295     | TMEM14E     | 3    | erythrocyte membrane protein band 4.2                                            | 9                     | 84                     | 66                      | 66                  | 2                        | 3                            |
| 222               | 3642087     | CHSY1       | 15   | transmembrane protein 14E                                                        | 9.9                   | 70                     | 66                      | 66                  | 1                        | 14                           |
| 223               | 3142985     | CA1         | 8    | chondroitin sulfate synthase 1                                                   | 11                    | 362                    | 66                      | 66                  | 8                        | 13                           |
| 225               | 3489676     | KCNRG       | 13   | carbonic anhydrase I                                                             | 9.6                   | 101                    | 65                      | 65                  | 3                        | 4                            |
| 226               | 2603972     | KCNJ13      | 2    | potassium channel regulator                                                      | 10.7                  | 74                     | 65                      | 65                  | 2                        | 8                            |
| 228               | 3718815     | TAF15       | 17   | potassium inwardly-rectifying channel, subfamily J, member 13                    | 15.7                  | 65                     | 96                      | 65                  | 9                        | 26                           |
| 229               | 3966226     | RABL2A      | 22   | TAF15 RNA polymerase II, TATA box binding protein (TBP)-associated factor, 68kDa | 12.1                  | 143                    | 65                      | 65                  | 2                        | 23                           |
| 232               | 3938243     | SDF2L1      | 22   | RAB, member of RAS oncogene family-like 2B                                       | 14.2                  | 64                     | 129                     | 64                  | 1                        | 4                            |
| 233               | 2328504     | KHDRBS1     | 1    | stromal cell-derived factor 2-like 1                                             | 12.4                  | 72                     | 64                      | 64                  | 1                        | 18                           |
| 234               | 3779400     | IMPA2       | 18   | KH domain containing, RNA binding, signal transduction associated 1              | 12.2                  | 128                    | 64                      | 64                  | 1                        | 14                           |
| 235               | 2402433     | PAQR7       | 1    | inositol(myo)-1(or 4)-monophosphatase 2                                          | 10.8                  | 94                     | 64                      | 64                  | 1                        | 6                            |
| 236               | 2496938     | IL1R2       | 2    | progesterone and adipoQ receptor family member VII                               | 9                     | 91                     | 63                      | 63                  | 8                        | 14                           |
| 237               | 3930240     | RCAN1       | 21   | interleukin 1 receptor, type II                                                  | 9.9                   | 83                     | 63                      | 63                  | 1                        | 14                           |
| 238               | 2477460     | QPCT        | 2    | regulator of calcineurin 1                                                       | 10.2                  | 254                    | 63                      | 63                  | 5                        | 12                           |
| 239               | 3212260     | KIF27       | 9    | glutaminyl-peptide cyclotransferase                                              | 10.8                  | 63                     | 73                      | 63                  | 7                        | 26                           |
| 240               | 2406678     | STK40       | 1    | kinesin family member 27                                                         | 10.6                  | 135                    | 63                      | 63                  | 1                        | 19                           |
| 241               | 2503639     | TSN         | 2    | serine/threonine kinase 40                                                       | 10.2                  | 81                     | 63                      | 63                  | 2                        | 14                           |
| 242               | 3890257     | C20orf43    | 20   | translin                                                                         | 12.1                  | 89                     | 63                      | 63                  | 5                        | 14                           |
| 243               | 2638072     | ADPRH       | 3    | chromosome 20 open reading frame 43                                              | 12.5                  | 63                     | 96                      | 63                  | 1                        | 11                           |
| 244               | 2458290     | LBR         | 1    | ADP-ribosylarginine hydrolase                                                    | 11.4                  | 63                     | 75                      | 63                  | 1                        | 18                           |
| 245               | 2475647     | YPEL5       | 2    | lamin B receptor                                                                 | 12.2                  | 306                    | 63                      | 63                  | 1                        | 6                            |

| Rank <sup>a</sup> | Probeset ID | Gene Symbol | Chr. | Description                                                                                                 | Mean PAX <sup>b</sup> | PAX / LCL <sup>c</sup> | PAX / PBMC <sup>c</sup> | Min FC <sup>d</sup> | Det. exon s <sup>e</sup> | Tot. no. exon s <sup>f</sup> |
|-------------------|-------------|-------------|------|-------------------------------------------------------------------------------------------------------------|-----------------------|------------------------|-------------------------|---------------------|--------------------------|------------------------------|
| 246               | 3759039     | SLC4A1      | 17   | solute carrier family 4, anion exchanger, member 1 (erythrocyte membrane protein band 3, Diego blood group) | 11.3                  | 110                    | 63                      | 63                  | 4                        | 22                           |
| 250               | 4052393     | SNRNP35     | 12   | (U11/U12)                                                                                                   | 8.9                   | 61                     | 71                      | 61                  | 2                        | 8                            |
| 252               | 3335950     | SF3B2       | 11   | splicing factor 3b, subunit 2, 145kDa                                                                       | 14.9                  | 61                     | 84                      | 61                  | 4                        | 26                           |
| 253               | 3830492     | FFAR2       | 19   | free fatty acid receptor 2                                                                                  | 10.6                  | 85                     | 61                      | 61                  | 1                        | 2                            |
| 254               | 2403302     | RPA2        | 1    | replication protein A2, 32kDa                                                                               | 12.1                  | 79                     | 61                      | 61                  | 5                        | 13                           |
| 255               | 3664842     | CMTM2       | 16   | CKLF-like MARVEL transmembrane domain containing 2                                                          | 9.8                   | 66                     | 60                      | 60                  | 3                        | 6                            |
| 256               | 2739266     | GAR1        | 4    | GAR1 ribonucleoprotein homolog (yeast) signal transducer and activator of transcription                     | 10.1                  | 60                     | 149                     | 60                  | 2                        | 13                           |
| 259               | 3721690     | STAT5A      | 17   | 5A                                                                                                          | 13                    | 81                     | 60                      | 60                  | 1                        | 27                           |
| 260               | 3041520     | TRA2A       | 7    | transformer 2 alpha homolog (Drosophila) coagulation factor C homolog, cochlin (Limulus polyphemus)         | 9.6                   | 75                     | 60                      | 60                  | 2                        | 16                           |
| 263               | 3531194     | COCH        | 14   | polyphemus)                                                                                                 | 11.2                  | 59                     | 240                     | 59                  | 2                        | 20                           |
| 265               | 4007735     | TFE3        | X    | transcription factor binding to IGHM enhancer 3                                                             | 12.8                  | 78                     | 59                      | 59                  | 1                        | 20                           |
| 266               | 4044638     | SLC35E2     | 1    | similar to solute carrier family 35, member E2                                                              | 9.3                   | 94                     | 59                      | 59                  | 1                        | 25                           |
| 268               | 3701626     | GFA2        | 16   | FGF-2 activity-associated protein 2                                                                         | 9.5                   | 71                     | 58                      | 58                  | 1                        | 3                            |
| 270               | 3065248     | RASA4       | 7    | RAS p21 protein activator 4                                                                                 | 13.4                  | 220                    | 58                      | 58                  | 2                        | 50                           |
| 271               | 3904945     | BLCAP       | 20   | bladder cancer associated protein                                                                           | 12.4                  | 71                     | 58                      | 58                  | 1                        | 7                            |
| 273               | 2910526     | FBXO9       | 6    | F-box protein 9                                                                                             | 9.8                   | 110                    | 58                      | 58                  | 6                        | 23                           |
| 274               | 3944146     | HMOX1       | 22   | heme oxygenase (decycling) 1                                                                                | 11.4                  | 123                    | 58                      | 58                  | 1                        | 6                            |
| 277               | 2358686     | C1orf56     | 1    | chromosome 1 open reading frame 56                                                                          | 8.6                   | 83                     | 58                      | 58                  | 2                        | 13                           |
| 278               | 3861980     | PAF1        | 19   | Paf1, RNA polymerase II associated factor, homolog (S. cerevisiae)                                          | 12.5                  | 58                     | 91                      | 58                  | 2                        | 18                           |
| 279               | 2531461     | SP100       | 2    | SP100 nuclear antigen                                                                                       | 9.9                   | 65                     | 57                      | 57                  | 1                        | 41                           |
| 281               | 2896978     | FAM8A1      | 6    | family with sequence similarity 8, member A1                                                                | 8.3                   | 96                     | 57                      | 57                  | 2                        | 16                           |
| 282               | 3377046     | SF1         | 11   | splicing factor 1                                                                                           | 12.9                  | 81                     | 57                      | 57                  | 3                        | 35                           |
| 283               | 3591693     | C15orf63    | 15   | chromosome 15 open reading frame 63                                                                         | 12.8                  | 56                     | 119                     | 56                  | 3                        | 15                           |
| 284               | 3551338     | CCNK        | 14   | cyclin K                                                                                                    | 8.6                   | 56                     | 57                      | 56                  | 2                        | 17                           |
| 285               | 3609192     | CHD2        | 15   | chromodomain helicase DNA binding protein 2                                                                 | 13.7                  | 62                     | 56                      | 56                  | 24                       | 48                           |
| 286               | 3293727     | C10orf54    | 10   | chromosome 10 open reading frame 54                                                                         | 13.8                  | 537                    | 56                      | 56                  | 2                        | 15                           |
| 287               | 2988871     | C7orf28A    | 7    | chromosome 7 open reading frame 28A                                                                         | 13.8                  | 102                    | 56                      | 56                  | 6                        | 40                           |
| 288               | 2320070     | TARDBP      | 1    | TAR DNA binding protein                                                                                     | 14.7                  | 58                     | 56                      | 56                  | 8                        | 23                           |
| 289               | 3992544     | HTATSF1     | X    | HIV-1 Tat specific factor 1                                                                                 | 9.6                   | 82                     | 56                      | 56                  | 4                        | 16                           |
| 290               | 3063771     | C7orf43     | 7    | chromosome 7 open reading frame 43                                                                          | 10.7                  | 95                     | 56                      | 56                  | 1                        | 18                           |
| 291               | 3679505     | TMEM186     | 16   | transmembrane protein 186                                                                                   | 12.8                  | 60                     | 56                      | 56                  | 2                        | 6                            |
| 293               | 2375339     | OCR1        | 1    | ovarian cancer-related protein 1                                                                            | 9.7                   | 99                     | 56                      | 56                  | 2                        | 3                            |
| 294               | 3535132     | ATP5S       | 14   | ATP synthase, H+ transporting, mitochondrial F0 complex, subunit s (factor B)                               | 11                    | 63                     | 56                      | 56                  | 2                        | 14                           |
| 295               | 3833780     | SNRPA       | 19   | small nuclear ribonucleoprotein polypeptide A                                                               | 11.6                  | 56                     | 74                      | 56                  | 1                        | 10                           |
| 296               | 3923568     | C21orf33    | 21   | chromosome 21 open reading frame 33                                                                         | 12.3                  | 74                     | 55                      | 55                  | 1                        | 11                           |
| 297               | 2362345     | MNDA        | 1    | myeloid cell nuclear differentiation antigen                                                                | 9.6                   | 135                    | 55                      | 55                  | 3                        | 9                            |
| 298               | 2854349     | FYB         | 5    | FYN binding protein                                                                                         | 11.2                  | 407                    | 55                      | 55                  | 1                        | 18                           |
| 299               | 3446870     | LDHB        | 12   | lactate dehydrogenase B                                                                                     | 12.5                  | 55                     | 100                     | 55                  | 2                        | 12                           |
| 301               | 3567190     | DHRS7       | 14   | dehydrogenase/reductase (SDR family) member 7                                                               | 8.5                   | 61                     | 55                      | 55                  | 8                        | 13                           |
| 302               | 3966058     | CHKB-CPT1B  | 22   | choline kinase-like, carnitine palmitoyltransferase 1B (muscle) transcription unit                          | 10.9                  | 64                     | 55                      | 55                  | 2                        | 42                           |
| 307               | 3645625     | MMP25       | 16   | matrix metalloproteinase 25                                                                                 | 11                    | 67                     | 54                      | 54                  | 1                        | 15                           |
| 308               | 3502594     | LAMP1       | 13   | lysosomal-associated membrane protein 1                                                                     | 15.7                  | 114                    | 54                      | 54                  | 2                        | 14                           |
| 310               | 3664807     | CKLF        | 16   | chemokine-like factor                                                                                       | 8.3                   | 124                    | 54                      | 54                  | 4                        | 9                            |
| 311               | 3952704     | C22orf39    | 22   | chromosome 22 open reading frame 39                                                                         | 10.8                  | 65                     | 54                      | 54                  | 1                        | 5                            |
| 314               | 2327726     | EPB41       | 1    | erythrocyte membrane protein band 4.1 (elliptocytosis 1, RH-linked)                                         | 7.7                   | 99                     | 54                      | 54                  | 5                        | 27                           |

<sup>a</sup>rank of the top probeset of the gene, according to minimum fold change.



<sup>b</sup>Mean of the top probeset of the gene in RMA units,  $\log_2$  scale.

<sup>c</sup>Fold change ratio of gene expression between PAX and LCL or between PAX and PBMC for the top probeset of the gene

<sup>d</sup>Minimum fold change of the top probeset of the gene

<sup>e</sup>Number of exons of the gene with  $\geq 8$  minimum fold change

<sup>f</sup>Total number of exons of the gene in the annotation

Supplementary Table 2. Partial list of exons highly expressed in LCL.

| Rank <sup>a</sup> | Probeset ID | Gene Symbol | Chr. | Description                                                                               | Mean LCL <sup>b</sup> | LCL / PAX <sup>c</sup> | LCL / PBM <sup>c</sup> | Min FC <sup>d</sup> | Det. exon <sup>e</sup> | Tot. no. exon <sup>f</sup> |
|-------------------|-------------|-------------|------|-------------------------------------------------------------------------------------------|-----------------------|------------------------|------------------------|---------------------|------------------------|----------------------------|
| 1                 | 3662688     | CCL22       | 16   | chemokine (C-C motif) ligand 22                                                           | 12.8                  | 290                    | 399                    | 290                 | 6                      | 8                          |
| 3                 | 3595983     | CCNB2       | 15   | cyclin B2                                                                                 | 11.2                  | 354                    | 125                    | 125                 | 7                      | 12                         |
| 4                 | 3756211     | TOP2A       | 17   | topoisomerase (DNA) II alpha 170kDa                                                       | 11.2                  | 191                    | 118                    | 118                 | 36                     | 42                         |
| 5                 | 3090706     | CDCA2       | 8    | cell division cycle associated 2                                                          | 10.6                  | 401                    | 115                    | 115                 | 8                      | 29                         |
| 6                 | 3197994     | GLDC        | 9    | glycine dehydrogenase (decarboxylating)                                                   | 10.6                  | 184                    | 109                    | 109                 | 10                     | 31                         |
| 7                 | 3040576     | MACC1       | 7    | metastasis associated in colon cancer 1                                                   | 10.7                  | 153                    | 105                    | 105                 | 12                     | 14                         |
| 8                 | 3629117     | KIAA0101    | 15   | KIAA0101                                                                                  | 10.4                  | 618                    | 104                    | 104                 | 7                      | 8                          |
| 9                 | 3881451     | TPX2        | 20   | TPX2, microtubule-associated, homolog (Xenopus laevis)                                    | 9.9                   | 192                    | 101                    | 101                 | 20                     | 28                         |
| 10                | 3589740     | BUB1B       | 15   | homolog beta (yeast)                                                                      | 9.2                   | 98                     | 116                    | 98                  | 17                     | 29                         |
| 11                | 3260610     | SCD         | 10   | stearoyl-CoA desaturase (delta-9-desaturase)                                              | 10.9                  | 307                    | 93                     | 93                  | 12                     | 13                         |
| 13                | 3703116     | GINS2       | 16   | GINS complex subunit 2 (Psf2 homolog)                                                     | 10.8                  | 297                    | 92                     | 92                  | 6                      | 8                          |
| 14                | 3775853     | TYMS        | 18   | thymidylate synthetase                                                                    | 12.8                  | 585                    | 92                     | 92                  | 8                      | 13                         |
| 15                | 3653079     | PLK1        | 16   | polo-like kinase 1 (Drosophila)                                                           | 10.8                  | 298                    | 92                     | 92                  | 10                     | 13                         |
| 16                | 3744282     | AURKB       | 17   | aurora kinase B                                                                           | 10.7                  | 91                     | 124                    | 91                  | 5                      | 13                         |
| 17                | 2378944     | DTL         | 1    | denticleless homolog (Drosophila)                                                         | 9.5                   | 103                    | 89                     | 89                  | 15                     | 16                         |
| 19                | 2784122     | CCNA2       | 4    | cyclin A2                                                                                 | 12.1                  | 140                    | 88                     | 88                  | 6                      | 10                         |
| 21                | 2333158     | CDC20       | 1    | cell division cycle 20 homolog (S. cerevisiae)                                            | 11.7                  | 160                    | 86                     | 86                  | 11                     | 15                         |
| 22                | 2372794     | RGS1        | 1    | regulator of G-protein signaling 1                                                        | 10.1                  | 231                    | 85                     | 85                  | 5                      | 8                          |
| 23                | 3565694     | DLGAP5      | 14   | discs, large (Drosophila) homolog-associated protein 5                                    | 11.6                  | 168                    | 85                     | 85                  | 19                     | 23                         |
| 24                | 2436878     | KCNN3       | 1    | potassium intermediate/small conductance calcium-activated channel, subfamily N, member 3 | 11.1                  | 92                     | 84                     | 84                  | 11                     | 19                         |
| 31                | 3258464     | CEP55       | 10   | centrosomal protein 55kDa                                                                 | 10.5                  | 125                    | 79                     | 79                  | 8                      | 15                         |
| 32                | 2720268     | NCAPG       | 4    | non-SMC condensin I complex, subunit G                                                    | 9.5                   | 87                     | 78                     | 78                  | 13                     | 23                         |
| 36                | 3754015     | CCL3        | 17   | chemokine (C-C motif) ligand 3                                                            | 12                    | 141                    | 76                     | 76                  | 5                      | 8                          |
| 42                | 3781576     | CABLES1     | 18   | Cdk5 and Abl enzyme substrate 1                                                           | 11.3                  | 186                    | 72                     | 72                  | 4                      | 12                         |
| 44                | 3129171     | PBK         | 8    | PDZ binding kinase                                                                        | 10.8                  | 78                     | 71                     | 71                  | 2                      | 14                         |
| 45                | 3817385     | EBI3        | 19   | Epstein-Barr virus induced 3                                                              | 11.1                  | 71                     | 88                     | 71                  | 4                      | 8                          |
| 52                | 3440634     | FOXM1       | 12   | forkhead box M1                                                                           | 9.2                   | 95                     | 68                     | 68                  | 6                      | 19                         |
| 53                | 2494497     | NCAPH       | 2    | non-SMC condensin I complex, subunit H                                                    | 10.8                  | 261                    | 68                     | 68                  | 19                     | 26                         |
| 54                | 4004051     | DMD         | X    | dystrophin                                                                                | 11.1                  | 178                    | 67                     | 67                  | 6                      | 108                        |
| 56                | 2330776     | CDCA8       | 1    | cell division cycle associated 8                                                          | 9.5                   | 111                    | 66                     | 66                  | 8                      | 13                         |
| 61                | 3886251     | MYBL2       | 20   | v-myb myeloblastosis viral oncogene homolog (avian)-like 2                                | 9.2                   | 172                    | 65                     | 65                  | 14                     | 19                         |
| 65                | 2570670     | BUB1        | 2    | homolog (yeast)                                                                           | 9.3                   | 156                    | 64                     | 64                  | 24                     | 31                         |
| 66                | 3331910     | FAM111B     | 11   | family with sequence similarity 111, member B                                             | 11.5                  | 137                    | 64                     | 64                  | 6                      | 9                          |
| 68                | 4040935     | CCL3L1      | 17   | chemokine (C-C motif) ligand 3-like 1                                                     | 11.9                  | 132                    | 63                     | 63                  | 4                      | 13                         |
| 72                | 3168519     | MELK        | 9    | maternal embryonic leucine zipper kinase                                                  | 10.8                  | 64                     | 62                     | 62                  | 7                      | 23                         |
| 75                | 2638090     | PLA1A       | 3    | phospholipase A1 member A                                                                 | 8.6                   | 61                     | 66                     | 61                  | 6                      | 15                         |
| 78                | 3248308     | CDK1        | 10   | cyclin-dependent kinase 1                                                                 | 8.2                   | 60                     | 65                     | 60                  | 5                      | 10                         |
| 79                | 2914786     | TTK         | 6    | TTK protein kinase                                                                        | 9.5                   | 130                    | 60                     | 60                  | 10                     | 24                         |
| 81                | 2830655     | KIF20A      | 5    | kinesin family member 20A                                                                 | 9                     | 71                     | 59                     | 59                  | 9                      | 19                         |
| 84                | 2707895     | LAMP3       | 3    | lysosomal-associated membrane protein 3                                                   | 13.5                  | 100                    | 59                     | 59                  | 6                      | 10                         |
| 86                | 3648405     | TNFRSF17    | 16   | tumor necrosis factor receptor superfamily, member 17                                     | 10                    | 151                    | 59                     | 59                  | 5                      | 7                          |
| 89                | 3013269     | PEG10       | 7    | paternally expressed 10                                                                   | 12                    | 171                    | 58                     | 58                  | 12                     | 21                         |
| 92                | 2693027     | SLC12A8     | 3    | solute carrier family 12 (potassium/chloride transporters), member 8                      | 10.4                  | 57                     | 82                     | 57                  | 6                      | 21                         |
| 94                | 2946371     | HIST1H3G    | 6    | histone cluster 1, H3g                                                                    | 14                    | 323                    | 57                     | 57                  | 2                      | 2                          |
| 102               | 3910788     | AURKA       | 20   | aurora kinase A                                                                           | 10.6                  | 98                     | 56                     | 56                  | 7                      | 16                         |
| 104               | 3868683     | KLK1        | 19   | kallikrein 1                                                                              | 12                    | 71                     | 55                     | 55                  | 4                      | 10                         |

| Rank <sup>a</sup> | Probeset ID | Gene Symbol | Chr. | Description                                                                          | Mean LCL <sup>b</sup> | LCL / PAX <sup>c</sup> | LCL / PBMC <sup>c</sup> | Min FC <sup>d</sup> | Det. exon s <sup>e</sup> | Tot. exon s <sup>f</sup> |
|-------------------|-------------|-------------|------|--------------------------------------------------------------------------------------|-----------------------|------------------------|-------------------------|---------------------|--------------------------|--------------------------|
| 107               | 3312511     | MKI67       | 10   | antigen identified by monoclonal antibody Ki-67                                      | 12.2                  | 91                     | 55                      | 55                  | 24                       | 31                       |
| 109               | 2690916     | CD80        | 3    | CD80 molecule                                                                        | 10.6                  | 120                    | 54                      | 54                  | 9                        | 14                       |
| 110               | 3887059     | UBE2C       | 20   | ubiquitin-conjugating enzyme E2C                                                     | 10.5                  | 77                     | 54                      | 54                  | 3                        | 15                       |
| 111               | 3919324     | CLIC6       | 21   | chloride intracellular channel 6                                                     | 9.4                   | 100                    | 54                      | 54                  | 5                        | 11                       |
| 115               | 2469276     | RRM2        | 2    | ribonucleotide reductase M2<br>fascin homolog 1, actin-bundling protein              | 11.1                  | 58                     | 53                      | 53                  | 10                       | 14                       |
| 117               | 2988748     | FSCN1       | 7    | (Strongylocentrotus purpuratus)                                                      | 9.6                   | 100                    | 53                      | 53                  | 9                        | 14                       |
| 119               | 2620262     | KIF15       | 3    | kinesin family member 15                                                             | 9.4                   | 89                     | 52                      | 52                  | 18                       | 36                       |
| 122               | 2947074     | HIST1H1B    | 6    | histone cluster 1, H1b                                                               | 12                    | 340                    | 52                      | 52                  | 2                        | 3                        |
| 123               | 2813424     | CCNB1       | 5    | cyclin B1                                                                            | 8                     | 68                     | 52                      | 52                  | 6                        | 15                       |
| 126               | 2434082     | HIST2H3A    | 1    | histone cluster 2, H3a                                                               | 14.9                  | 1033                   | 51                      | 51                  | 2                        | 4                        |
| 135               | 3354810     | CHEK1       | 11   | CHK1 checkpoint homolog (S. pombe)                                                   | 10.9                  | 51                     | 49                      | 49                  | 12                       | 17                       |
| 136               | 3258181     | KIF11       | 10   | kinesin family member 11                                                             | 8.5                   | 63                     | 48                      | 48                  | 19                       | 26                       |
| 138               | 3750824     | SPAG5       | 17   | sperm associated antigen 5                                                           | 11.5                  | 77                     | 48                      | 48                  | 16                       | 31                       |
| 140               | 3595004     | TEX9        | 15   | testis expressed 9                                                                   | 9.2                   | 57                     | 48                      | 48                  | 5                        | 12                       |
| 144               | 2417534     | DEPDC1      | 1    | DEP domain containing 1                                                              | 8.9                   | 65                     | 47                      | 47                  | 4                        | 18                       |
| 149               | 2334100     | KIF2C       | 1    | kinesin family member 2C                                                             | 10.6                  | 55                     | 47                      | 47                  | 11                       | 27                       |
| 151               | 3536340     | CDKN3       | 14   | cyclin-dependent kinase inhibitor 3<br>asp (abnormal spindle) homolog, microcephaly  | 8.1                   | 79                     | 46                      | 46                  | 7                        | 13                       |
| 155               | 2449571     | ASPM        | 1    | associated (Drosophila)                                                              | 8.3                   | 47                     | 46                      | 46                  | 24                       | 46                       |
| 159               | 2742961     | HSPA4L      | 4    | heat shock 70kDa protein 4-like                                                      | 9                     | 63                     | 46                      | 46                  | 7                        | 21                       |
| 161               | 2798922     | TRIP13      | 5    | thyroid hormone receptor interactor 13                                               | 9.9                   | 91                     | 46                      | 46                  | 11                       | 21                       |
| 167               | 3590392     | NUSAP1      | 15   | nucleolar and spindle associated protein 1                                           | 10.2                  | 78                     | 45                      | 45                  | 14                       | 17                       |
| 170               | 3041818     | DFNA5       | 7    | deafness, autosomal dominant 5                                                       | 9.7                   | 44                     | 68                      | 44                  | 6                        | 15                       |
| 177               | 3962177     | CENPM       | 22   | centromere protein M                                                                 | 8.4                   | 44                     | 47                      | 44                  | 1                        | 9                        |
| 180               | 3847996     | CD70        | 19   | CD70 molecule                                                                        | 11.8                  | 44                     | 48                      | 44                  | 3                        | 8                        |
| 182               | 2946217     | HIST1H3B    | 6    | histone cluster 1, H3b                                                               | 14.2                  | 588                    | 43                      | 43                  | 1                        | 2                        |
| 187               | 2379919     | CENPF       | 1    | centromere protein F, 350/400ka (mitosin)<br>ADAM metallopeptidase domain 6          | 9.2                   | 46                     | 42                      | 42                  | 16                       | 34                       |
| 189               | 3581925     | IGHM        | 14   | (pseudogene)                                                                         | 15.9                  | 69                     | 42                      | 42                  | 7                        | 31                       |
| 192               | 3980604     | KIF4A       | X    | kinesin family member 4A                                                             | 10.5                  | 65                     | 42                      | 42                  | 4                        | 34                       |
| 199               | 2899104     | HIST1H3C    | 6    | histone cluster 1, H3c                                                               | 14.2                  | 2389                   | 41                      | 41                  | 1                        | 1                        |
| 201               | 3754805     | HNF1B       | 17   | HNF1 homeobox B<br>lymphotoxin alpha (TNF superfamily, member                        | 9.2                   | 41                     | 42                      | 41                  | 5                        | 19                       |
| 206               | 2902414     | LTA         | 6    | 1)                                                                                   | 12.5                  | 225                    | 41                      | 41                  | 3                        | 5                        |
| 208               | 3140232     | MSC         | 8    | musculin                                                                             | 9.8                   | 177                    | 41                      | 41                  | 4                        | 10                       |
| 216               | 3463134     | E2F7        | 12   | E2F transcription factor 7                                                           | 9.6                   | 40                     | 44                      | 40                  | 8                        | 22                       |
| 218               | 2529435     | SGPP2       | 2    | sphingosine-1-phosphate phosphatase 2                                                | 10.4                  | 161                    | 40                      | 40                  | 7                        | 10                       |
| 219               | 3061827     | SGCE        | 7    | sarcoglycan, epsilon                                                                 | 10.3                  | 63                     | 39                      | 39                  | 5                        | 18                       |
| 228               | 3689885     | SHCBP1      | 16   | SHC SH2-domain binding protein 1                                                     | 10.8                  | 45                     | 39                      | 39                  | 11                       | 16                       |
| 229               | 3590024     | CASC5       | 15   | cancer susceptibility candidate 5                                                    | 9.1                   | 58                     | 39                      | 39                  | 18                       | 47                       |
| 230               | 3129733     | DUSP4       | 8    | dual specificity phosphatase 4                                                       | 9.5                   | 39                     | 47                      | 39                  | 3                        | 12                       |
| 231               | 3390865     | POU2AF1     | 11   | POU class 2 associating factor 1                                                     | 12.2                  | 165                    | 39                      | 39                  | 5                        | 10                       |
| 232               | 2798651     | AHRR        | 5    | aryl-hydrocarbon receptor repressor                                                  | 8.5                   | 41                     | 39                      | 39                  | 1                        | 19                       |
| 235               | 3377427     | CDCA5       | 11   | cell division cycle associated 5                                                     | 9.7                   | 58                     | 39                      | 39                  | 4                        | 10                       |
| 246               | 2947097     | HIST1H3J    | 6    | histone cluster 1, H3j<br>semaphorin 7A, GPI membrane anchor (John                   | 11.2                  | 363                    | 38                      | 38                  | 3                        | 3                        |
| 248               | 3632918     | SEMA7A      | 15   | Milton Hagen blood group)                                                            | 10.6                  | 56                     | 38                      | 38                  | 11                       | 15                       |
| 249               | 2900060     | M           | 6    | histone cluster 1, H2bm                                                              | 11.8                  | 321                    | 38                      | 38                  | 2                        | 2                        |
| 252               | 3936920     | CDC45       | 22   | cell division cycle 45 homolog (S. cerevisiae)                                       | 9.9                   | 99                     | 38                      | 38                  | 7                        | 20                       |
| 253               | 3880836     | GINS1       | 20   | GINS complex subunit 1 (Psf1 homolog)                                                | 9.4                   | 49                     | 38                      | 38                  | 5                        | 10                       |
| 258               | 3516038     | DIAPH3      | 13   | diaphanous homolog 3 (Drosophila)<br>aryl hydrocarbon receptor nuclear translocator- | 9.3                   | 77                     | 38                      | 38                  | 9                        | 23                       |
| 273               | 3409163     | ARNTL2      | 12   | like 2                                                                               | 8                     | 57                     | 36                      | 36                  | 9                        | 26                       |
| 274               | 3365778     | E2F8        | 11   | E2F transcription factor 8                                                           | 8.8                   | 62                     | 36                      | 36                  | 8                        | 18                       |
| 280               | 2334663     | RAD54L      | 1    | RAD54-like (S. cerevisiae)                                                           | 9.7                   | 120                    | 36                      | 36                  | 3                        | 21                       |

Det. Tot.

| Rank <sup>a</sup> | ID      | Gene Symbol | Chr | Description                                                                                             | Mean LCL <sup>b</sup> | LCL / PAX <sup>c</sup> | LCL / PBMC <sup>c</sup> | Min FC <sup>d</sup> | exon s <sup>e</sup> | no. exon s <sup>f</sup> |
|-------------------|---------|-------------|-----|---------------------------------------------------------------------------------------------------------|-----------------------|------------------------|-------------------------|---------------------|---------------------|-------------------------|
| 284               | 2450368 | KIF14       | 1   | kinesin family member 14                                                                                | 8.2                   | 36                     | 45                      | 36                  | 12                  | 47                      |
| 287               | 2947045 | HIST1H2AI   | 6   | histone cluster 1, H2aj                                                                                 | 14                    | 489                    | 35                      | 35                  | 4                   | 4                       |
| 288               | 3590094 | RAD51       | 15  | RAD51 homolog (RecA homolog, E. coli) (S. cerevisiae)                                                   | 7.7                   | 57                     | 35                      | 35                  | 5                   | 12                      |
| 289               | 3622398 | GATM        | 15  | glycine amidinotransferase (L-arginine:glycine amidinotransferase)                                      | 10.4                  | 287                    | 35                      | 35                  | 8                   | 10                      |
| 295               | 2767023 | APBB2       | 4   | amyloid beta (A4) precursor protein-binding, family B, member 2                                         | 7.4                   | 38                     | 35                      | 35                  | 9                   | 20                      |
| 296               | 3848510 | FCER2       | 19  | Fc fragment of IgE, low affinity II, receptor for (CD23)                                                | 10.9                  | 281                    | 35                      | 35                  | 13                  | 18                      |
| 298               | 2412831 | ORC1L       | 1   | origin recognition complex, subunit 1-like (yeast)                                                      | 10                    | 61                     | 35                      | 35                  | 8                   | 25                      |
| 328               | 3291612 | EGR2        | 10  | early growth response 2                                                                                 | 11                    | 32                     | 48                      | 32                  | 3                   | 8                       |
| 329               | 3487321 | TNFSF11     | 13  | tumor necrosis factor (ligand) superfamily, member 11                                                   | 9.2                   | 47                     | 32                      | 32                  | 1                   | 12                      |
| 332               | 2947042 | HIST1H2AJ   | 6   | histone cluster 1, H2aj                                                                                 | 13.9                  | 61                     | 32                      | 32                  | 1                   | 2                       |
| 333               | 2742994 | PLK4        | 4   | polo-like kinase 4 (Drosophila)                                                                         | 9.4                   | 59                     | 32                      | 32                  | 10                  | 23                      |
| 339               | 3504622 | SKA3        | 13  | spindle and kinetochore associated complex subunit 3                                                    | 8.8                   | 51                     | 32                      | 32                  | 5                   | 15                      |
| 341               | 2786354 | SLC7A11     | 4   | solute carrier family 7, (cationic amino acid transporter, y+ system) member 11                         | 9.6                   | 35                     | 32                      | 32                  | 11                  | 16                      |
| 344               | 2451216 | UBE2T       | 1   | ubiquitin-conjugating enzyme E2T (putative)                                                             | 10.6                  | 85                     | 32                      | 32                  | 5                   | 8                       |
| 346               | 2780197 | CENPE       | 4   | centromere protein E, 312kDa                                                                            | 7.7                   | 43                     | 32                      | 32                  | 18                  | 61                      |
| 348               | 3720907 | CDC6        | 17  | cell division cycle 6 homolog (S. cerevisiae)                                                           | 8.6                   | 31                     | 43                      | 31                  | 9                   | 14                      |
| 352               | 3607737 | C15orf42    | 15  | chromosome 15 open reading frame 42                                                                     | 10.1                  | 43                     | 31                      | 31                  | 6                   | 14                      |
| 357               | 3160689 | SLC1A1      | 9   | solute carrier family 1 (neuronal/epithelial high affinity glutamate transporter, system Xag), member 1 | 7.7                   | 31                     | 43                      | 31                  | 5                   | 13                      |
| 360               | 2454457 | NEK2        | 1   | NIMA (never in mitosis gene a)-related kinase 2                                                         | 9.8                   | 31                     | 60                      | 31                  | 3                   | 12                      |
| 363               | 3788060 | SKA1        | 18  | spindle and kinetochore associated complex subunit 1                                                    | 7.6                   | 52                     | 31                      | 31                  | 3                   | 12                      |
| 368               | 2340330 | AK3L1       | 1   | adenylate kinase 3-like 1                                                                               | 8.2                   | 60                     | 30                      | 30                  | 6                   | 11                      |
| 375               | 3599836 | KIF23       | 15  | kinesin family member 23                                                                                | 8.7                   | 35                     | 30                      | 30                  | 12                  | 25                      |
| 378               | 2891371 | IRF4        | 6   | interferon regulatory factor 4                                                                          | 13.8                  | 30                     | 30                      | 30                  | 11                  | 17                      |
| 381               | 4052899 | FAM72A      | 1   | family with sequence similarity 72, member D                                                            | 9.2                   | 51                     | 30                      | 30                  | 4                   | 6                       |
| 382               | 3415887 | ESPL1       | 12  | extra spindle pole bodies homolog 1 (S. cerevisiae)                                                     | 9.4                   | 34                     | 30                      | 30                  | 4                   | 47                      |
| 383               | 2476697 | RASGRP3     | 2   | RAS guanyl releasing protein 3 (calcium and DAG-regulated)                                              | 9.8                   | 36                     | 30                      | 30                  | 18                  | 25                      |
| 386               | 3178592 | CKS2        | 9   | CDC28 protein kinase regulatory subunit 2                                                               | 9.3                   | 30                     | 42                      | 30                  | 3                   | 6                       |
| 388               | 3817717 | UHRF1       | 19  | ubiquitin-like with PHD and ring finger domains 1                                                       | 9                     | 71                     | 30                      | 30                  | 10                  | 19                      |
| 389               | 3474189 | CIT         | 12  | citron (rho-interacting, serine/threonine kinase 21)                                                    | 8.7                   | 54                     | 30                      | 30                  | 16                  | 57                      |
| 390               | 2571471 | CKAP2L      | 2   | cytoskeleton associated protein 2-like                                                                  | 8.3                   | 41                     | 30                      | 30                  | 6                   | 13                      |
| 391               | 3367357 | KIF18A      | 11  | kinesin family member 18A                                                                               | 7.1                   | 74                     | 30                      | 30                  | 12                  | 20                      |
| 404               | 3581824 | IGHG1       | 14  | ADAM metallopeptidase domain 6 (pseudogene)                                                             | 12.6                  | 267                    | 29                      | 29                  | 7                   | 39                      |
| 405               | 3301752 | BLNK        | 10  | B-cell linker                                                                                           | 8.5                   | 29                     | 31                      | 29                  | 7                   | 19                      |
| 406               | 2838674 | HMMR        | 5   | hyaluronan-mediated motility receptor (RHAMM)                                                           | 7.8                   | 29                     | 49                      | 29                  | 7                   | 20                      |
| 407               | 3772170 | TK1         | 17  | thymidine kinase 1, soluble                                                                             | 10.5                  | 78                     | 29                      | 29                  | 1                   | 11                      |
| 412               | 3581858 | IGHG3       | 14  | ADAM metallopeptidase domain 6 (pseudogene)                                                             | 12.2                  | 498                    | 28                      | 28                  | 8                   | 15                      |
| 414               | 3581836 | IGHV4-31    | 14  | ADAM metallopeptidase domain 6 (pseudogene)                                                             | 12.9                  | 514                    | 28                      | 28                  | 17                  | 32                      |
| 415               | 2900094 | L           | 6   | histone cluster 1, H2al                                                                                 | 10.1                  | 71                     | 28                      | 28                  | 2                   | 2                       |

| Rank<br><sup>a</sup> | Probeset<br>ID | Gene<br>Symbol | Chr. | Description                                                                       | Mean<br>LCL <sup>b</sup> | LCL /<br>PAX <sup>c</sup> | LCL /<br>PBMC <sup>c</sup> | Min<br>FC <sup>d</sup> | Det.<br>exon<br>s <sup>e</sup> | Tot.<br>no.<br>exon<br>s <sup>f</sup> |
|----------------------|----------------|----------------|------|-----------------------------------------------------------------------------------|--------------------------|---------------------------|----------------------------|------------------------|--------------------------------|---------------------------------------|
|                      |                |                |      | minichromosome maintenance complex                                                |                          |                           |                            |                        |                                |                                       |
| 420                  | 3097163        | MCM4           | 8    | component 4                                                                       | 7.6                      | 46                        | 28                         | 28                     | 18                             | 29                                    |
| 424                  | 2531791        | ARMC9          | 2    | armadillo repeat containing 9                                                     | 7.4                      | 36                        | 28                         | 28                     | 1                              | 26                                    |
| 432                  | 2665592        | SGOL1          | 3    | shugoshin-like 1 (S. pombe)                                                       | 9.3                      | 28                        | 37                         | 28                     | 4                              | 9                                     |
|                      |                |                |      | apolipoprotein B mRNA editing enzyme,<br>catalytic polypeptide-like 3B            | 9.2                      | 54                        | 28                         | 28                     | 4                              | 11                                    |
| 433                  | 3945552        | APOBEC3B       | 22   |                                                                                   |                          |                           |                            |                        |                                |                                       |
| 436                  | 2411233        | STIL           | 1    | SCL/TAL1 interrupting locus                                                       | 11.6                     | 34                        | 28                         | 28                     | 14                             | 33                                    |
|                      |                |                |      | minichromosome maintenance complex                                                |                          |                           |                            |                        |                                |                                       |
| 439                  | 3235803        | MCM10          | 10   | component 10                                                                      | 7.6                      | 27                        | 30                         | 27                     | 10                             | 29                                    |
| 444                  | 3603443        | CHRNA5         | 15   | cholinergic receptor, nicotinic, alpha 5                                          | 8.2                      | 33                        | 27                         | 27                     | 2                              | 13                                    |
| 445                  | 2343497        | IFI44L         | 1    | interferon-induced protein 44-like                                                | 8.9                      | 53                        | 27                         | 27                     | 15                             | 16                                    |
|                      |                |                |      | UDP glucuronosyltransferase 2 family,<br>polypeptide B17                          | 7.6                      | 30                        | 27                         | 27                     | 2                              | 16                                    |
| 448                  | 2772095        | UGT2B15        | 4    |                                                                                   |                          |                           |                            |                        |                                |                                       |
| 454                  | 3443211        | AICDA          | 12   | activation-induced cytidine deaminase                                             | 10.8                     | 27                        | 36                         | 27                     | 2                              | 10                                    |
| 462                  | 2796540        | MLF1IP         | 4    | MLF1 interacting protein                                                          | 9                        | 89                        | 26                         | 26                     | 10                             | 24                                    |
| 469                  | 3258949        | HELLS          | 10   | helicase, lymphoid-specific                                                       | 7.3                      | 44                        | 26                         | 26                     | 12                             | 28                                    |
| 481                  | 3428849        | C12orf48       | 12   | chromosome 12 open reading frame 48                                               | 8.7                      | 30                        | 25                         | 25                     | 7                              | 22                                    |
|                      |                |                |      | ATP-binding cassette, sub-family A (ABC1),<br>member 6                            | 8.8                      | 32                        | 25                         | 25                     | 6                              | 53                                    |
| 484                  | 3768800        | ABCA6          | 17   |                                                                                   |                          |                           |                            |                        |                                |                                       |
| 486                  | 2691583        | POLQ           | 3    | polymerase (DNA directed), theta                                                  | 7.8                      | 26                        | 25                         | 25                     | 10                             | 57                                    |
| 487                  | 3607539        | FANCI          | 15   | Fanconi anemia, complementation group I                                           | 7.3                      | 49                        | 25                         | 25                     | 25                             | 45                                    |
| 490                  | 2516056        | CDCA7          | 2    | cell division cycle associated 7                                                  | 7.3                      | 30                        | 25                         | 25                     | 1                              | 17                                    |
| 502                  | 3818520        | TRIP10         | 19   | thyroid hormone receptor interactor 10                                            | 10.3                     | 170                       | 25                         | 25                     | 8                              | 17                                    |
| 510                  | 3451968        | RACGAP1        | 12   | Rac GTPase activating protein 1 pseudogene                                        | 10                       | 67                        | 25                         | 25                     | 15                             | 24                                    |
| 511                  | 2604265        | HJURP          | 2    | Holliday junction recognition protein                                             | 9.1                      | 26                        | 25                         | 25                     | 6                              | 17                                    |
| 514                  | 2317388        | TP73           | 1    | tumor protein p73                                                                 | 8.3                      | 25                        | 27                         | 25                     | 2                              | 20                                    |
| 520                  | 3623062        | FBN1           | 15   | fibrillin 1                                                                       | 8.5                      | 38                        | 24                         | 24                     | 6                              | 69                                    |
|                      |                |                |      | complement component (3d/Epstein Barr virus)<br>receptor 2                        | 8.3                      | 33                        | 24                         | 24                     | 13                             | 19                                    |
| 539                  | 2377323        | CR2            | 1    |                                                                                   |                          |                           |                            |                        |                                |                                       |
|                      |                |                |      | ADAM metalloproteinase domain 6<br>(pseudogene)                                   | 13.1                     | 289                       | 24                         | 24                     | 3                              | 7                                     |
| 540                  | 3581692        | IGHG4          | 14   |                                                                                   |                          |                           |                            |                        |                                |                                       |
| 551                  | 2363862        | FCRLA          | 1    | Fc receptor-like A                                                                | 10.4                     | 116                       | 23                         | 23                     | 9                              | 13                                    |
| 563                  | 2371132        | LAMC1          | 1    | laminin, gamma 1 (formerly LAMB2)                                                 | 7.2                      | 33                        | 23                         | 23                     | 14                             | 36                                    |
| 579                  | 2388229        | EXO1           | 1    | exonuclease 1                                                                     | 8.9                      | 36                        | 22                         | 22                     | 5                              | 17                                    |
| 582                  | 3626882        | MYO1E          | 15   | myosin IE                                                                         | 8                        | 36                        | 22                         | 22                     | 10                             | 36                                    |
|                      |                |                |      | cell adhesion molecule with homology to<br>LICAM (close homolog of L1)            | 7.3                      | 22                        | 30                         | 22                     | 3                              | 33                                    |
| 586                  | 2607632        | CHL1           | 3    |                                                                                   |                          |                           |                            |                        |                                |                                       |
|                      |                | ARHGAP11       |      |                                                                                   |                          |                           |                            |                        |                                |                                       |
| 588                  | 3587478        | A              | 15   | Rho GTPase activating protein 11A                                                 | 9.3                      | 25                        | 22                         | 22                     | 13                             | 21                                    |
| 592                  | 2754622        | SNX25          | 4    | sorting nexin 25                                                                  | 9.4                      | 27                        | 22                         | 22                     | 16                             | 27                                    |
|                      |                |                |      | budding uninhibited by benzimidazoles 1<br>homolog beta (yeast)                   | 9.3                      | 22                        | 26                         | 22                     | 1                              | 14                                    |
| 593                  | 3589734        | PAK6           | 15   |                                                                                   |                          |                           |                            |                        |                                |                                       |
| 595                  | 2752736        | NEIL3          | 4    | nei endonuclease VIII-like 3 (E. coli)                                            | 9.3                      | 22                        | 28                         | 22                     | 2                              | 16                                    |
| 608                  | 3205295        | PAX5           | 9    | paired box 5                                                                      | 11                       | 69                        | 22                         | 22                     | 6                              | 13                                    |
| 610                  | 2958511        | DST            | 6    | dystonin                                                                          | 8                        | 47                        | 22                         | 22                     | 33                             | 136                                   |
|                      |                |                |      | solute carrier family 7 (cationic amino acid<br>transporter, y+ system), member 5 | 8.8                      | 69                        | 22                         | 22                     | 13                             | 21                                    |
| 611                  | 3703904        | SLC7A5         | 16   |                                                                                   |                          |                           |                            |                        |                                |                                       |
| 617                  | 2413913        | DHCR24         | 1    | 24-dehydrocholesterol reductase                                                   | 10.1                     | 109                       | 21                         | 21                     | 11                             | 12                                    |
| 626                  | 3105478        | E2F5           | 8    | E2F transcription factor 5, p130-binding                                          | 7.3                      | 78                        | 21                         | 21                     | 4                              | 17                                    |
| 627                  | 3144997        | RAD54B         | 8    | RAD54 homolog B (S. cerevisiae)                                                   | 8.3                      | 29                        | 21                         | 21                     | 8                              | 27                                    |
|                      |                |                |      | ubiquitin carboxyl-terminal esterase L1<br>(ubiquitin thiolesterase)              | 6.5                      | 21                        | 23                         | 21                     | 3                              | 13                                    |
| 629                  | 2725047        | UCHL1          | 4    |                                                                                   |                          |                           |                            |                        |                                |                                       |
|                      |                |                |      | minichromosome maintenance complex                                                |                          |                           |                            |                        |                                |                                       |
| 630                  | 2640866        | MCM2           | 3    | component 2                                                                       | 9.7                      | 49                        | 21                         | 21                     | 11                             | 21                                    |
| 632                  | 2474002        | CENPA          | 2    | centromere protein A                                                              | 10.3                     | 26                        | 21                         | 21                     | 2                              | 9                                     |
| 642                  | 3949070        | GTSE1          | 22   | G-2 and S-phase expressed 1                                                       | 9.6                      | 35                        | 21                         | 21                     | 2                              | 21                                    |
| 645                  | 3175979        | PSAT1          | 9    | phosphoserine aminotransferase 1                                                  | 10.3                     | 56                        | 21                         | 21                     | 3                              | 12                                    |
|                      | Probeset       |                |      |                                                                                   |                          |                           |                            |                        | Det.                           | Tot.                                  |

| Rank <sup>a</sup> | ID      | Gene Symbol | Chr. | Description                                     | Mean LCL <sup>b</sup> | LCL / PAX <sup>c</sup> | LCL / PBMC <sup>c</sup> | Min FC <sup>d</sup> | exon s <sup>e</sup> | no. exon s <sup>f</sup> |
|-------------------|---------|-------------|------|-------------------------------------------------|-----------------------|------------------------|-------------------------|---------------------|---------------------|-------------------------|
|                   |         |             |      | SPC25, NDC80 kinetochore complex                |                       |                        |                         |                     |                     |                         |
| 646               | 2585935 | SPC25       | 2    | component, homolog (S. cerevisiae)              | 8.1                   | 21                     | 28                      | 21                  | 4                   | 7                       |
| 649               | 3884908 | FAM83D      | 20   | family with sequence similarity 83, member D    | 7.5                   | 39                     | 21                      | 21                  | 3                   | 13                      |
| 661               | 2997402 | ANLN        | 7    | anillin, actin binding protein                  | 6.8                   | 33                     | 20                      | 20                  | 15                  | 31                      |
|                   |         |             |      | NDC80 homolog, kinetochore complex              |                       |                        |                         |                     |                     |                         |
| 665               | 3776148 | NDC80       | 18   | component (S. cerevisiae)                       | 7.8                   | 20                     | 26                      | 20                  | 9                   | 17                      |
| 667               | 3728988 | PRR11       | 17   | proline rich 11                                 | 7.8                   | 20                     | 22                      | 20                  | 6                   | 13                      |
| 678               | 2438897 | FCRL5       | 1    | Fc receptor-like 5                              | 8.4                   | 25                     | 20                      | 20                  | 5                   | 33                      |
| 679               | 3577083 | LGMN        | 14   | legumain                                        | 9.1                   | 103                    | 20                      | 20                  | 13                  | 18                      |
|                   |         |             |      | SPC24, NDC80 kinetochore complex                |                       |                        |                         |                     |                     |                         |
| 681               | 3850666 | SPC24       | 19   | component, homolog (S. cerevisiae)              | 6                     | 20                     | 20                      | 20                  | 1                   | 10                      |
| 686               | 3468348 | IGF1        | 12   | insulin-like growth factor 1 (somatomedin C)    | 9.6                   | 20                     | 24                      | 20                  | 2                   | 5                       |
|                   |         |             |      | phorbol-12-myristate-13-acetate-induced protein |                       |                        |                         |                     |                     |                         |
| 699               | 3790710 | PMAIP1      | 18   | 1                                               | 10.1                  | 43                     | 20                      | 20                  | 5                   | 7                       |
| 702               | 3736304 | BIRC5       | 17   | baculoviral IAP repeat-containing 5             | 8.6                   | 26                     | 20                      | 20                  | 3                   | 12                      |
| 703               | 3204705 | C9orf100    | 9    | chromosome 9 open reading frame 100             | 7.2                   | 20                     | 31                      | 20                  | 2                   | 21                      |
| 705               | 3639048 | PRC1        | 15   | protein regulator of cytokinesis 1              | 9.4                   | 20                     | 31                      | 20                  | 8                   | 20                      |
| 708               | 3485081 | RFC3        | 13   | replication factor C (activator 1) 3, 38kDa     | 10.2                  | 82                     | 20                      | 20                  | 10                  | 13                      |
| 719               | 3765632 | BRIP1       | 17   | BRCA1 interacting protein C-terminal helicase 1 | 10.8                  | 62                     | 19                      | 19                  | 13                  | 27                      |
| 725               | 3705498 | FAM57A      | 17   | family with sequence similarity 57, member A    | 11.2                  | 19                     | 24                      | 19                  | 3                   | 8                       |
| 732               | 3868197 | IL41I       | 19   | nucleoporin 62kDa                               | 10.2                  | 34                     | 19                      | 19                  | 2                   | 14                      |
| 735               | 3721928 | TUBG1       | 17   | tubulin, gamma 1                                | 12.6                  | 77                     | 19                      | 19                  | 9                   | 12                      |
| 746               | 2360454 | CKS1B       | 1    | CDC28 protein kinase regulatory subunit 1B      | 10.5                  | 40                     | 19                      | 19                  | 2                   | 5                       |
| 748               | 2673104 | CDC25A      | 3    | cell division cycle 25 homolog A (S. pombe)     | 7.9                   | 19                     | 21                      | 19                  | 2                   | 18                      |
|                   |         |             |      | NUF2, NDC80 kinetochore complex                 |                       |                        |                         |                     |                     |                         |
| 749               | 2364447 | NUF2        | 1    | component, homolog (S. cerevisiae)              | 9.9                   | 38                     | 19                      | 19                  | 10                  | 17                      |
| 755               | 3442333 | CDCA3       | 12   | cell division cycle associated 3                | 8.9                   | 19                     | 20                      | 19                  | 1                   | 9                       |
| 768               | 2676189 | NT5DC2      | 3    | 5'-nucleotidase domain containing 2             | 10.3                  | 66                     | 19                      | 19                  | 13                  | 22                      |
|                   |         |             |      | karyopherin alpha 2 (RAG cohort 1, importin     |                       |                        |                         |                     |                     |                         |
| 770               | 4041136 | KPNA2       | 17   | alpha 1)                                        | 8.6                   | 68                     | 19                      | 19                  | 22                  | 27                      |
| 773               | 3994939 | HMGB3       | X    | high-mobility group box 3                       | 8.4                   | 27                     | 18                      | 18                  | 1                   | 12                      |
| 780               | 2712641 | TFRC        | 3    | transferrin receptor (p90, CD71)                | 12.8                  | 97                     | 18                      | 18                  | 12                  | 24                      |
| 787               | 3722784 | C17orf53    | 17   | chromosome 17 open reading frame 53             | 8.8                   | 18                     | 20                      | 18                  | 4                   | 18                      |
| 795               | 3984669 | CENPI       | X    | centromere protein I                            | 7.5                   | 19                     | 18                      | 18                  | 10                  | 24                      |
|                   |         |             |      | methylenetetrahydrofolate dehydrogenase         |                       |                        |                         |                     |                     |                         |
| 796               | 2931456 | MTHFD1L     | 6    | (NADP+ dependent) 1-like                        | 8.4                   | 71                     | 18                      | 18                  | 10                  | 36                      |
| 799               | 3705059 | FANCA       | 16   | Fanconi anemia, complementation group A         | 6.9                   | 23                     | 18                      | 18                  | 1                   | 59                      |
| 806               | 2687999 | KIAA1524    | 3    | KIAA1524                                        | 7.7                   | 19                     | 18                      | 18                  | 8                   | 25                      |
| 809               | 3774439 | PYCR1       | 17   | pyrroline-5-carboxylate reductase 1             | 9.8                   | 18                     | 24                      | 18                  | 2                   | 16                      |
| 814               | 2898622 | GMNN        | 6    | geminin, DNA replication inhibitor              | 7.5                   | 29                     | 18                      | 18                  | 6                   | 14                      |
|                   |         |             |      | phosphoribosylaminoimidazole carboxylase,       |                       |                        |                         |                     |                     |                         |
|                   |         |             |      | phosphoribosylaminoimidazole                    |                       |                        |                         |                     |                     |                         |
| 819               | 2728210 | PAICS       | 4    | succinocarboxamide synthetase                   | 9.9                   | 20                     | 18                      | 18                  | 12                  | 17                      |
| 823               | 2864625 | DHFR        | 5    | dihydrofolate reductase                         | 9.9                   | 50                     | 18                      | 18                  | 5                   | 9                       |
| 824               | 2354696 | PHGDH       | 1    | phosphoglycerate dehydrogenase                  | 10.3                  | 51                     | 18                      | 18                  | 6                   | 17                      |
| 828               | 3936563 | USP18       | 22   | ubiquitin specific peptidase 18                 | 7.8                   | 73                     | 18                      | 18                  | 8                   | 18                      |
| 832               | 3333233 | FEN1        | 11   | flap structure-specific endonuclease 1          | 9.9                   | 103                    | 18                      | 18                  | 1                   | 8                       |
|                   |         |             |      | X-ray repair complementing defective repair in  |                       |                        |                         |                     |                     |                         |
| 835               | 3080288 | XRCC2       | 7    | Chinese hamster cells 2                         | 8.5                   | 46                     | 18                      | 18                  | 2                   | 8                       |
|                   |         |             |      | tumor necrosis factor (ligand) superfamily,     |                       |                        |                         |                     |                     |                         |
| 837               | 3818476 | TNFSF9      | 19   | member 9                                        | 10.4                  | 18                     | 18                      | 18                  | 2                   | 8                       |
| 839               | 3828136 | CCNE1       | 19   | cyclin E1                                       | 9.3                   | 20                     | 17                      | 17                  | 5                   | 15                      |
|                   |         |             |      | protein kinase, membrane associated             |                       |                        |                         |                     |                     |                         |
| 846               | 3677319 | PKMYT1      | 16   | tyrosine/threonine 1                            | 11.6                  | 17                     | 18                      | 17                  | 2                   | 13                      |
|                   |         |             |      | ASF1 anti-silencing function 1 homolog B (S.    |                       |                        |                         |                     |                     |                         |
| 847               | 3852569 | ASF1B       | 19   | cerevisiae)                                     | 11                    | 30                     | 17                      | 17                  | 5                   | 5                       |
|                   |         |             |      | tumor necrosis factor receptor superfamily,     |                       |                        |                         |                     |                     |                         |
| 863               | 2320697 | TNFRSF8     | 1    | member 8                                        | 9.6                   | 17                     | 24                      | 17                  | 1                   | 21                      |

<sup>a</sup>rank of the top probeset of the gene, according to minimum fold change.

<sup>b</sup>Mean of the top probeset of the gene in RMA units,  $\log_2$  scale.

<sup>c</sup>Fold change ratio of gene expression between LCL and PAX or between LCL and PBMC for the top probeset of the gene

<sup>d</sup>Minimum fold change of the top probeset of the gene

<sup>e</sup>Number of exons of the gene with  $\geq 8$  minimum fold change

<sup>f</sup>Total number of exons of the gene in the annotation

Supplementary Table 3. Partial list of exons highly expressed in PBMC.

| Rank <sup>a</sup> | Probeset ID | Gene Symbol | Chr. | Description                                                                                                                | Mean PBMC <sup>b</sup> | PBMC / LCL <sup>c</sup> | PBMC / LCL <sup>c</sup> | Min FC <sup>d</sup> | Det. exon <sup>e</sup> | Tot. no. exon <sup>f</sup> |
|-------------------|-------------|-------------|------|----------------------------------------------------------------------------------------------------------------------------|------------------------|-------------------------|-------------------------|---------------------|------------------------|----------------------------|
| 1                 | 2829952     | TGFBI       | 5    | transforming growth factor, beta-induced, 68kDa integrin, alpha 2b (platelet glycoprotein IIb of                           | 11.2                   | 304                     | 305                     | 304                 | 8                      | 22                         |
| 3                 | 3759171     | ITGA2B      | 17   | IIb/IIIa complex, antigen CD41)<br>ST6 beta-galactosamide alpha-2,6-                                                       | 12.3                   | 211                     | 151                     | 151                 | 9                      | 36                         |
| 7                 | 2569230     | ST6GAL2     | 2    | sialyltransferase 2                                                                                                        | 8.9                    | 84                      | 86                      | 84                  | 2                      | 11                         |
| 8                 | 4007178     | CFP         | X    | complement factor properdin                                                                                                | 11.5                   | 80                      | 103                     | 80                  | 5                      | 14                         |
| 9                 | 3293445     | PRF1        | 10   | perforin 1 (pore forming protein)<br>LFNG O-fucosylpeptide 3-beta-N-                                                       | 13.6                   | 153                     | 80                      | 80                  | 6                      | 9                          |
| 10                | 2987566     | LFNG        | 7    | acetylglucosaminyltransferase                                                                                              | 12.4                   | 78                      | 117                     | 78                  | 4                      | 10                         |
| 11                | 3220416     | LPAR1       | 9    | lysophosphatidic acid receptor 1<br>low density lipoprotein receptor-related protein                                       | 11.6                   | 133                     | 75                      | 75                  | 4                      | 14                         |
| 14                | 3417947     | LRP1        | 12   | 1<br>sparc/osteonectin, cwcv and kazal-like domains                                                                        | 11.8                   | 90                      | 60                      | 60                  | 52                     | 110                        |
| 16                | 3293862     | SPOCK2      | 10   | proteoglycan (testican) 2                                                                                                  | 10.3                   | 78                      | 58                      | 58                  | 8                      | 20                         |
| 17                | 2791423     | FAM198B     | 4    | family with sequence similarity 198, member B                                                                              | 9.9                    | 388                     | 57                      | 57                  | 2                      | 6                          |
| 18                | 3382252     | ARRB1       | 11   | arrestin, beta 1                                                                                                           | 11.6                   | 64                      | 56                      | 56                  | 8                      | 15                         |
| 19                | 3891345     | TUBB1       | 20   | tubulin, beta 1                                                                                                            | 13.4                   | 630                     | 55                      | 55                  | 4                      | 8                          |
| 21                | 3012981     | GNG11       | 7    | guanine nucleotide binding protein (G protein),<br>gamma 11<br>transmembrane phosphoinositide 3-phosphatase                | 8.6                    | 53                      | 73                      | 53                  | 2                      | 4                          |
| 22                | 3503851     | TPTE2       | 13   | and tensin homolog 2                                                                                                       | 11.9                   | 117                     | 52                      | 52                  | 2                      | 19                         |
| 24                | 3917261     | C21orf7     | 21   | chromosome 21 open reading frame 7                                                                                         | 13.1                   | 59                      | 50                      | 50                  | 7                      | 23                         |
| 25                | 3589479     | THBS1       | 15   | thrombospondin 1                                                                                                           | 10.5                   | 55                      | 50                      | 50                  | 19                     | 26                         |
| 26                | 3178560     | S1PR3       | 9    | chromosome 9 open reading frame 47<br>leukocyte immunoglobulin-like receptor,                                              | 10.6                   | 49                      | 76                      | 49                  | 3                      | 5                          |
| 30                | 3870780     | LILRA5      | 19   | subfamily A (with TM domain), member 5                                                                                     | 11.0                   | 163                     | 48                      | 48                  | 5                      | 15                         |
| 33                | 3774917     | SECTM1      | 17   | secreted and transmembrane 1<br>killer cell immunoglobulin-like receptor, three                                            | 11.0                   | 151                     | 47                      | 47                  | 1                      | 10                         |
| 37                | 4053021     | KIR3DS1     | 19   | domains, short cytoplasmic tail, 1                                                                                         | 9.5                    | 156                     | 43                      | 43                  | 2                      | 14                         |
| 40                | 3957810     | PIK3IP1     | 22   | phosphoinositide-3-kinase interacting protein 1<br>ATP-binding cassette, sub-family C                                      | 10.3                   | 46                      | 41                      | 41                  | 1                      | 14                         |
| 41                | 3726720     | ABCC3       | 17   | (CFTR/MRP), member 3<br>integrin, beta 3 (platelet glycoprotein IIIa,                                                      | 9.7                    | 41                      | 66                      | 41                  | 8                      | 47                         |
| 45                | 3724557     | ITGB3       | 17   | antigen CD61)                                                                                                              | 12.6                   | 39                      | 42                      | 39                  | 17                     | 21                         |
| 47                | 2441227     | SH2D1B      | 1    | SH2 domain containing 1B                                                                                                   | 8.7                    | 153                     | 38                      | 38                  | 3                      | 7                          |
| 49                | 3662833     | GPR56       | 16   | G protein-coupled receptor 56                                                                                              | 10.3                   | 64                      | 37                      | 37                  | 7                      | 18                         |
| 50                | 2818529     | VCAN        | 5    | versican<br>killer cell immunoglobulin-like receptor, three                                                                | 9.4                    | 213                     | 37                      | 37                  | 6                      | 27                         |
| 51                | 3841808     | KIR3DL1     | 19   | domains, long cytoplasmic tail, 1                                                                                          | 10.3                   | 100                     | 37                      | 37                  | 4                      | 16                         |
| 52                | 3904525     | SLA2        | 20   | Src-like-adaptor 2                                                                                                         | 11.1                   | 53                      | 36                      | 36                  | 5                      | 11                         |
| 54                | 2329293     | ZNF362      | 1    | zinc finger protein 362                                                                                                    | 11.7                   | 41                      | 36                      | 36                  | 3                      | 13                         |
| 55                | 2620848     | CCR2        | 3    | chemokine (C-C motif) receptor 2                                                                                           | 8.4                    | 64                      | 36                      | 36                  | 2                      | 11                         |
| 56                | 2701088     | P2RY12      | 3    | purinergic receptor P2Y, G-protein coupled, 12<br>prostaglandin-endoperoxide synthase 1<br>(prostaglandin G/H synthase and | 10.6                   | 53                      | 35                      | 35                  | 1                      | 8                          |
| 57                | 3188121     | PTGS1       | 9    | cyclooxygenase)<br>single immunoglobulin and toll-interleukin 1                                                            | 11.9                   | 35                      | 40                      | 35                  | 10                     | 17                         |
| 58                | 3357900     | SIGIRR      | 11   | receptor (TIR) domain                                                                                                      | 11.2                   | 35                      | 39                      | 35                  | 5                      | 17                         |
| 59                | 3512308     | TSC22D1     | 13   | TSC22 domain family, member 1<br>latent transforming growth factor beta binding                                            | 9.4                    | 204                     | 35                      | 35                  | 6                      | 22                         |
| 60                | 2476582     | LTBP1       | 2    | protein 1                                                                                                                  | 10.0                   | 50                      | 34                      | 34                  | 5                      | 45                         |
| 61                | 3770312     | CD300C      | 17   | CD300c molecule                                                                                                            | 10.1                   | 37                      | 34                      | 34                  | 1                      | 7                          |
| 62                | 3734434     | RAB37       | 17   | RAB37, member RAS oncogene family<br>carboxylesterase 1 (monocyte/macrophage                                               | 12.4                   | 34                      | 44                      | 34                  | 3                      | 18                         |
| 63                | 3692728     | CES1        | 16   | serine esterase 1)                                                                                                         | 11.0                   | 42                      | 34                      | 34                  | 2                      | 18                         |
| 69                | 3774894     | CD7         | 17   | CD7 molecule                                                                                                               | 13.3                   | 80                      | 33                      | 33                  | 3                      | 7                          |



| Rank <sup>a</sup> | Probeset ID | Gene Symbol | Chr. | Description                                      | Mean PBMC <sup>b</sup> | PBMC / LCL <sup>c</sup> | PBMC / LCL <sup>c</sup> | Min FC <sup>d</sup> | Det. exon <sup>e</sup> | Tot. no. exon <sup>f</sup> |
|-------------------|-------------|-------------|------|--------------------------------------------------|------------------------|-------------------------|-------------------------|---------------------|------------------------|----------------------------|
|                   |             |             |      | v-maf musculoaponeurotic fibrosarcoma            |                        |                         |                         |                     |                        |                            |
| 70                | 3905888     | MAFB        | 20   | oncogene homolog B (avian)                       | 12.1                   | 95                      | 33                      | 33                  | 1                      | 15                         |
| 72                | 3043683     | CPVL        | 7    | carboxypeptidase, vitellogenic-like              | 11.4                   | 202                     | 33                      | 33                  | 3                      | 20                         |
| 73                | 3402803     | CD4         | 12   | CD4 molecule                                     | 13.0                   | 239                     | 33                      | 33                  | 4                      | 15                         |
| 74                | 3371023     | TP53I11     | 11   | tumor protein p53 inducible protein 11           | 8.2                    | 32                      | 34                      | 32                  | 1                      | 14                         |
|                   |             |             |      | CKLF-like MARVEL transmembrane domain            |                        |                         |                         |                     |                        |                            |
| 75                | 3664867     | CMTM3       | 16   | containing 3                                     | 9.9                    | 32                      | 64                      | 32                  | 8                      | 15                         |
|                   |             |             |      | selectin P (granule membrane protein 140kDa,     |                        |                         |                         |                     |                        |                            |
| 76                | 2443437     | SELP        | 1    | antigen CD62)                                    | 9.1                    | 48                      | 32                      | 32                  | 8                      | 21                         |
|                   |             |             |      | sulfotransferase family, cytosolic, 1A, phenol-  |                        |                         |                         |                     |                        |                            |
| 77                | 3654637     | SULT1A1     | 16   | preferring, member 1                             | 11.3                   | 59                      | 32                      | 32                  | 1                      | 26                         |
|                   |             |             |      | pro-platelet basic protein (chemokine (C-X-C     |                        |                         |                         |                     |                        |                            |
| 79                | 2773364     | PPBP        | 4    | motif) ligand 7)                                 | 14.2                   | 725                     | 32                      | 32                  | 5                      | 6                          |
| 82                | 2878441     | CD14        | 5    | CD14 molecule                                    | 11.6                   | 236                     | 31                      | 31                  | 2                      | 4                          |
| 84                | 3337339     | ALDH3B1     | 11   | aldehyde dehydrogenase 3 family, member B1       | 10.7                   | 45                      | 31                      | 31                  | 2                      | 21                         |
| 85                | 3445569     | PLBD1       | 12   | phospholipase B domain containing 1              | 11.6                   | 30                      | 34                      | 30                  | 2                      | 16                         |
| 86                | 2783644     | PDE5A       | 4    | phosphodiesterase 5A, cGMP-specific              | 8.2                    | 87                      | 30                      | 30                  | 10                     | 28                         |
|                   |             |             |      | ficolin (collagen/fibrinogen domain containing)  |                        |                         |                         |                     |                        |                            |
| 87                | 3229357     | FCN1        | 9    | 1                                                | 12.3                   | 103                     | 30                      | 30                  | 2                      | 9                          |
| 88                | 2792220     | MARCH1      | 4    | membrane-associated ring finger (C3HC4) 1        | 8.4                    | 49                      | 30                      | 30                  | 1                      | 9                          |
| 89                | 2562946     | CD8A        | 2    | CD8a molecule                                    | 10.6                   | 44                      | 30                      | 30                  | 6                      | 12                         |
|                   |             |             |      | phospholipase A2, group VII (platelet-activating |                        |                         |                         |                     |                        |                            |
| 90                | 2955841     | PLA2G7      | 6    | factor acetylhydrolase, plasma)                  | 8.0                    | 86                      | 30                      | 30                  | 2                      | 14                         |
| 98                | 3293730     | C10orf54    | 10   | chromosome 10 open reading frame 54              | 10.8                   | 29                      | 33                      | 29                  | 2                      | 15                         |
|                   |             |             |      | killer cell immunoglobulin-like receptor, two    |                        |                         |                         |                     |                        |                            |
| 101               | 4053047     | KIR2DS1     | 19   | domains, short cytoplasmic tail, 1               | 8.6                    | 66                      | 29                      | 29                  | 4                      | 18                         |
| 102               | 2362193     | CD1A        | 1    | CD1a molecule                                    | 9.4                    | 36                      | 29                      | 29                  | 1                      | 11                         |
|                   |             |             |      | leukocyte immunoglobulin-like receptor,          |                        |                         |                         |                     |                        |                            |
|                   |             |             |      | subfamily B (with TM and ITIM domains),          |                        |                         |                         |                     |                        |                            |
| 107               | 3870670     | LILRA3      | 19   | member 3                                         | 11.0                   | 34                      | 28                      | 28                  | 5                      | 16                         |
|                   |             |             |      | solute carrier family 18 (vesicular monoamine),  |                        |                         |                         |                     |                        |                            |
| 110               | 3266292     | SLC18A2     | 10   | member 2                                         | 7.1                    | 37                      | 28                      | 28                  | 2                      | 16                         |
|                   |             |             |      | prostaglandin E receptor 2 (subtype EP2),        |                        |                         |                         |                     |                        |                            |
| 112               | 3535799     | PTGER2      | 14   | 53kDa                                            | 9.0                    | 28                      | 30                      | 28                  | 4                      | 7                          |
|                   |             |             |      | solute carrier family 40 (iron-regulated         |                        |                         |                         |                     |                        |                            |
| 113               | 2591889     | SLC40A1     | 2    | transporter), member 1                           | 11.4                   | 161                     | 27                      | 27                  | 2                      | 17                         |
| 114               | 2367616     | FASLG       | 1    | Fas ligand (TNF superfamily, member 6)           | 8.7                    | 63                      | 27                      | 27                  | 1                      | 8                          |
| 116               | 2761839     | FGFBP2      | 4    | fibroblast growth factor binding protein 2       | 10.8                   | 36                      | 27                      | 27                  | 1                      | 4                          |
|                   |             |             |      | killer cell immunoglobulin-like receptor, three  |                        |                         |                         |                     |                        |                            |
| 118               | 3841826     | KIR3DL2     | 19   | domains, long cytoplasmic tail, 1                | 8.8                    | 50                      | 27                      | 27                  | 1                      | 15                         |
|                   |             |             |      | suppression of tumorigenicity 14 (colon          |                        |                         |                         |                     |                        |                            |
| 119               | 3356185     | ST14        | 11   | carcinoma)                                       | 8.1                    | 27                      | 38                      | 27                  | 2                      | 20                         |
| 120               | 2475013     | FOSL2       | 2    | FOS-like antigen 2                               | 8.6                    | 60                      | 27                      | 27                  | 1                      | 16                         |
| 124               | 3872280     | VN1R1       | 19   | vomer nasal 1 receptor 1                         | 7.7                    | 26                      | 127                     | 26                  | 2                      | 7                          |
|                   |             |             |      | integrin, alpha M (complement component 3        |                        |                         |                         |                     |                        |                            |
| 127               | 3657033     | ITGAM       | 16   | receptor 3 subunit)                              | 10.0                   | 27                      | 25                      | 25                  | 5                      | 36                         |
| 129               | 2421085     | COL24A1     | 1    | collagen, type XXIV, alpha 1                     | 8.8                    | 34                      | 25                      | 25                  | 1                      | 62                         |
| 130               | 2333129     | MPL         | 1    | myeloproliferative leukemia virus oncogene       | 9.0                    | 38                      | 25                      | 25                  | 2                      | 22                         |
| 136               | 3327079     | PRR5L       | 11   | proline rich 5 like                              | 9.0                    | 49                      | 24                      | 24                  | 3                      | 15                         |
| 144               | 2902615     | C6orf25     | 6    | chromosome 6 open reading frame 25               | 13.7                   | 61                      | 24                      | 24                  | 3                      | 10                         |
|                   |             |             |      | killer cell immunoglobulin-like receptor, two    |                        |                         |                         |                     |                        |                            |
| 146               | 3841766     | KIR2DL1     | 19   | domains, long cytoplasmic tail, 1                | 8.9                    | 89                      | 24                      | 24                  | 3                      | 21                         |
| 148               | 3707338     | GP1BA       | 17   | glycoprotein Ib (platelet), alpha polypeptide    | 10.4                   | 179                     | 24                      | 24                  | 4                      | 10                         |
| 149               | 2888503     | HK3         | 5    | hexokinase 3 (white cell)                        | 9.4                    | 50                      | 24                      | 24                  | 4                      | 24                         |
| 152               | 3574184     | STON2       | 14   | stonin 2                                         | 8.8                    | 38                      | 23                      | 23                  | 3                      | 17                         |
| 153               | 3788983     | RAB27B      | 18   | RAB27B, member RAS oncogene family               | 10.7                   | 392                     | 23                      | 23                  | 4                      | 8                          |

| Rank <sup>a</sup> | Probeset ID | Gene Symbol | Chr. | Description                                                                                            | Mean PBMC <sup>b</sup> | PBMC / LCL <sup>c</sup> | PBMC / LCL <sup>c</sup> | Min FC <sup>d</sup> | Det. exon <sup>e</sup> | Tot. no. exon <sup>f</sup> |
|-------------------|-------------|-------------|------|--------------------------------------------------------------------------------------------------------|------------------------|-------------------------|-------------------------|---------------------|------------------------|----------------------------|
| 154               | 3335700     | CTSW        | 11   | cathepsin W                                                                                            | 10.0                   | 100                     | 23                      | 23                  | 4                      | 14                         |
| 155               | 2773353     | PF4         | 4    | platelet factor 4                                                                                      | 13.4                   | 47                      | 23                      | 23                  | 3                      | 5                          |
| 158               | 2528110     | CYP27A1     | 2    | polypeptide 1                                                                                          | 9.2                    | 29                      | 23                      | 23                  | 2                      | 13                         |
| 159               | 3237795     | PLXDC2      | 10   | plexin domain containing 2                                                                             | 10.7                   | 36                      | 23                      | 23                  | 2                      | 19                         |
| 162               | 3291191     | RHOBTB1     | 10   | Rho-related BTB domain containing 1                                                                    | 7.0                    | 22                      | 23                      | 22                  | 1                      | 23                         |
| 167               | 3333883     | LGALS12     | 11   | lectin, galactoside-binding, soluble, 12                                                               | 8.2                    | 37                      | 22                      | 22                  | 2                      | 16                         |
| 169               | 3757199     | KRT16       | 17   | keratin 16                                                                                             | 11.6                   | 142                     | 22                      | 22                  | 1                      | 15                         |
| 170               | 2694825     | PLXND1      | 3    | plexin D1                                                                                              | 8.8                    | 80                      | 22                      | 22                  | 13                     | 62                         |
| 171               | 3823692     | KLF2        | 19   | Kruppel-like factor 2 (lung)                                                                           | 11.3                   | 22                      | 70                      | 22                  | 3                      | 11                         |
| 173               | 3883930     | MYL9        | 20   | myosin, light chain 9, regulatory triggering receptor expressed on myeloid cells-like 1                | 11.0                   | 43                      | 22                      | 22                  | 2                      | 7                          |
| 175               | 2953494     | TREML1      | 6    | like 1                                                                                                 | 10.4                   | 32                      | 21                      | 21                  | 3                      | 9                          |
| 176               | 2881227     | CSF1R       | 5    | colony stimulating factor 1 receptor                                                                   | 12.4                   | 176                     | 21                      | 21                  | 18                     | 36                         |
| 177               | 2583266     | CD302       | 2    | lymphocyte antigen 75 tumor necrosis factor receptor superfamily, member 25                            | 10.4                   | 21                      | 30                      | 21                  | 3                      | 9                          |
| 180               | 2394719     | TNFRSF25    | 1    | leukocyte immunoglobulin-like receptor, subfamily A (with TM domain), member 1                         | 9.0                    | 38                      | 21                      | 21                  | 1                      | 20                         |
| 182               | 3841559     | LILRA1      | 19   | BEN domain containing 2                                                                                | 7.8                    | 82                      | 21                      | 21                  | 6                      | 20                         |
| 184               | 4001344     | BEND2       | X    | transmembrane phosphatase with tensin homology                                                         | 8.5                    | 48                      | 21                      | 21                  | 5                      | 19                         |
| 187               | 3924899     | TPTE        | 21   | killer cell lectin-like receptor subfamily F, member 1                                                 | 12.1                   | 63                      | 20                      | 20                  | 2                      | 36                         |
| 190               | 3404499     | KLRF1       | 12   | CDC14 cell division cycle 14 homolog B (S. cerevisiae)                                                 | 7.9                    | 80                      | 20                      | 20                  | 1                      | 9                          |
| 194               | 3216415     | CDC14B      | 9    | NDRG family member 2                                                                                   | 6.6                    | 28                      | 20                      | 20                  | 5                      | 25                         |
| 195               | 3555768     | NDRG2       | 14   | guanine nucleotide binding protein (G protein), alpha z polypeptide                                    | 10.0                   | 112                     | 20                      | 20                  | 4                      | 24                         |
| 206               | 3939137     | GNAZ        | 22   | linker for activation of T cells                                                                       | 9.9                    | 24                      | 19                      | 19                  | 2                      | 11                         |
| 208               | 3654975     | LAT         | 16   | CD6 molecule                                                                                           | 10.7                   | 20                      | 19                      | 19                  | 3                      | 17                         |
| 216               | 3332704     | CD6         | 11   | erythrocyte membrane protein band 4.1-like 3                                                           | 9.9                    | 37                      | 18                      | 18                  | 3                      | 21                         |
| 218               | 3797098     | EPB41L3     | 18   | CD33 molecule                                                                                          | 7.2                    | 44                      | 18                      | 18                  | 2                      | 42                         |
| 221               | 3839724     | CD33        | 19   | neurogranin (protein kinase C substrate, RC3)                                                          | 11.5                   | 33                      | 18                      | 18                  | 3                      | 9                          |
| 222               | 3354233     | NRGN        | 11   | family with sequence similarity 105, member A                                                          | 11.7                   | 43                      | 18                      | 18                  | 3                      | 5                          |
| 223               | 2802708     | FAM105A     | 5    | integrin, beta 5                                                                                       | 7.8                    | 75                      | 18                      | 18                  | 1                      | 11                         |
| 227               | 2692831     | ITGB5       | 3    | regulator of G-protein signaling 18 disabled homolog 2, mitogen-responsive phosphoprotein (Drosophila) | 9.4                    | 18                      | 18                      | 18                  | 2                      | 21                         |
| 231               | 2372725     | RGS18       | 1    | clusterin                                                                                              | 8.4                    | 145                     | 17                      | 17                  | 2                      | 9                          |
| 234               | 2854463     | DAB2        | 5    | killer cell immunoglobulin-like receptor, two domains, short cytoplasmic tail, 2                       | 9.0                    | 111                     | 17                      | 17                  | 9                      | 21                         |
| 235               | 3129086     | CLU         | 8    | CD68 molecule                                                                                          | 12.1                   | 89                      | 17                      | 17                  | 8                      | 23                         |
| 237               | 4053062     | KIR2DS2     | 19   | granzyme K (granzyme 3; tryptase II) CCAAT/enhancer binding protein (C/EBP), alpha                     | 8.0                    | 24                      | 17                      | 17                  | 2                      | 14                         |
| 241               | 3708865     | CD68        | 17   | CD1d molecule                                                                                          | 13.1                   | 87                      | 17                      | 17                  | 3                      | 13                         |
| 244               | 2809795     | GZMK        | 5    | CD300e molecule transforming growth factor, beta receptor II (70/80kDa)                                | 8.9                    | 109                     | 17                      | 17                  | 1                      | 7                          |
| 246               | 3858996     | CEBPA       | 19   | polycystic kidney and hepatic disease 1 (autosomal recessive)-like 1                                   | 9.2                    | 16                      | 17                      | 16                  | 1                      | 9                          |
| 247               | 2362164     | CD1D        | 1    | TYRO protein tyrosine kinase binding protein                                                           | 8.3                    | 38                      | 16                      | 16                  | 1                      | 11                         |
| 248               | 3770350     | CD300E      | 17   | acrosin binding protein                                                                                | 11.4                   | 103                     | 16                      | 16                  | 1                      | 5                          |
| 249               | 2615380     | TGFBR2      | 3    | family with sequence similarity 125, member B                                                          | 11.4                   | 24                      | 16                      | 16                  | 1                      | 12                         |
| 250               | 3111565     | PKHD1L1     | 8    | multimerin 1                                                                                           | 8.0                    | 32                      | 16                      | 16                  | 1                      | 94                         |
| 252               | 3860153     | TYROBP      | 19   |                                                                                                        | 13.0                   | 326                     | 16                      | 16                  | 2                      | 9                          |
| 255               | 3442155     | ACRBP       | 12   |                                                                                                        | 10.2                   | 131                     | 16                      | 16                  | 1                      | 17                         |
| 265               | 3189444     | FAM125B     | 9    |                                                                                                        | 6.5                    | 23                      | 16                      | 16                  | 1                      | 18                         |
| 269               | 2735788     | MMRN1       | 4    |                                                                                                        | 8.6                    | 15                      | 16                      | 15                  | 3                      | 19                         |

| Rank <sup>a</sup> | Probeset ID | Gene Symbol | Chr. | Description                                                                                   | Mean PBMC <sup>b</sup> | PBMC / LCL <sup>c</sup> | PBMC / LCL <sup>c</sup> | Min FC <sup>d</sup> | Det. exon <sup>e</sup> | Tot. no. exon <sup>f</sup> |
|-------------------|-------------|-------------|------|-----------------------------------------------------------------------------------------------|------------------------|-------------------------|-------------------------|---------------------|------------------------|----------------------------|
| 271               | 3223597     | MEGF9       | 9    | multiple EGF-like-domains 9                                                                   | 11.5                   | 15                      | 28                      | 15                  | 1                      | 6                          |
| 272               | 2663318     | TMEM40      | 3    | transmembrane protein 40                                                                      | 10.6                   | 59                      | 15                      | 15                  | 5                      | 13                         |
| 273               | 2834948     | ABLIM3      | 5    | actin binding LIM protein family, member 3                                                    | 8.8                    | 29                      | 15                      | 15                  | 2                      | 30                         |
| 278               | 3332747     | CD5         | 11   | CD5 molecule                                                                                  | 8.5                    | 27                      | 15                      | 15                  | 3                      | 14                         |
| 281               | 3838566     | FLT3LG      | 19   | fms-related tyrosine kinase 3 ligand                                                          | 12.1                   | 15                      | 17                      | 15                  | 4                      | 14                         |
| 282               | 3838635     | FCGRT       | 19   | Fc fragment of IgG, receptor, transporter, alpha leukocyte immunoglobulin-like receptor,      | 10.4                   | 22                      | 15                      | 15                  | 1                      | 13                         |
| 284               | 3870806     | LILRA4      | 19   | subfamily A (with TM domain), member 4 ArfGAP with SH3 domain, ankyrin repeat and             | 8.4                    | 15                      | 15                      | 15                  | 1                      | 13                         |
| 285               | 2468848     | ASAP2       | 2    | PH domain 2                                                                                   | 8.4                    | 17                      | 15                      | 15                  | 7                      | 37                         |
| 286               | 3770365     | CD300LF     | 17   | CD300 molecule-like family member f                                                           | 8.7                    | 56                      | 15                      | 15                  | 1                      | 12                         |
| 288               | 3888617     | CEBPB       | 20   | CCAAT/enhancer binding protein (C/EBP), beta                                                  | 11.0                   | 15                      | 19                      | 15                  | 4                      | 9                          |
| 291               | 3432433     | RPH3A       | 12   | rabphilin 3A homolog (mouse)                                                                  | 10.0                   | 171                     | 15                      | 15                  | 1                      | 28                         |
| 292               | 2434191     | MTMR11      | 1    | myotubularin related protein 11                                                               | 9.7                    | 48                      | 15                      | 15                  | 4                      | 32                         |
| 294               | 3535755     | PTGDR       | 14   | prostaglandin D2 receptor (DP)                                                                | 9.4                    | 19                      | 15                      | 15                  | 1                      | 9                          |
| 300               | 3902779     | C20orf112   | 20   | chromosome 20 open reading frame 112                                                          | 8.7                    | 14                      | 21                      | 14                  | 1                      | 17                         |
| 301               | 3351286     | CD3E        | 11   | CD3e molecule, epsilon (CD3-TCR complex) T cell receptor associated transmembrane             | 8.4                    | 32                      | 14                      | 14                  | 2                      | 7                          |
| 302               | 2635360     | TRAT1       | 3    | adaptor 1 killer cell immunoglobulin-like receptor, two                                       | 6.2                    | 31                      | 14                      | 14                  | 1                      | 7                          |
| 303               | 4052996     | KIR2DS5     | 19   | domains, long cytoplasmic tail, 2                                                             | 7.7                    | 31                      | 14                      | 14                  | 1                      | 5                          |
| 306               | 2562994     | CD8B        | 2    | CD8b molecule                                                                                 | 8.7                    | 29                      | 14                      | 14                  | 2                      | 16                         |
| 308               | 3579174     | BCL11B      | 14   | B-cell CLL/lymphoma 11B (zinc finger protein)                                                 | 10.2                   | 45                      | 14                      | 14                  | 4                      | 14                         |
| 310               | 3252086     | VCL         | 10   | vinculin phosphodiesterase 4D, cAMP-specific (phosphodiesterase E3 dunce homolog, Drosophila) | 9.5                    | 14                      | 15                      | 14                  | 2                      | 40                         |
| 312               | 2858148     | PDE4D       | 5    | Drosophila)                                                                                   | 8.3                    | 39                      | 14                      | 14                  | 3                      | 43                         |
| 314               | 3356117     | APLP2       | 11   | amyloid beta (A4) precursor-like protein 2 serpin peptidase inhibitor, clade A (alpha-1       | 10.8                   | 14                      | 19                      | 14                  | 1                      | 29                         |
| 315               | 3549772     | SERPINA3    | 14   | antiproteinase, antitrypsin), member 3                                                        | 8.6                    | 122                     | 14                      | 14                  | 1                      | 11                         |
| 319               | 2431124     | NOTCH2      | 1    | Notch homolog 2 (Drosophila)                                                                  | 9.5                    | 42                      | 14                      | 14                  | 2                      | 41                         |
| 321               | 3643957     | TMEM204     | 16   | transmembrane protein 204                                                                     | 10.2                   | 72                      | 14                      | 14                  | 2                      | 7                          |
| 325               | 3151974     | MTSS1       | 8    | metastasis suppressor 1 serum/glucocorticoid regulated kinase family, member 3                | 6.0                    | 18                      | 14                      | 14                  | 2                      | 29                         |
| 331               | 3101829     | SGK3        | 8    | member 3                                                                                      | 9.2                    | 14                      | 19                      | 14                  | 2                      | 20                         |
| 339               | 3212023     | FRMD3       | 9    | FERM domain containing 3                                                                      | 6.9                    | 14                      | 22                      | 14                  | 1                      | 24                         |
| 342               | 3174836     | ANXA1       | 9    | annexin A1 CTD (carboxy-terminal domain, RNA polymerase II, polypeptide A) small              | 9.6                    | 34                      | 14                      | 14                  | 4                      | 14                         |
| 344               | 2617314     | CTDSPL      | 3    | phosphatase-like proline-serine-threonine phosphatase interacting                             | 7.5                    | 25                      | 13                      | 13                  | 3                      | 17                         |
| 347               | 3806245     | PSTPIP2     | 18   | protein 2                                                                                     | 8.7                    | 13                      | 20                      | 13                  | 1                      | 15                         |
| 348               | 2475925     | EHD3        | 2    | EH-domain containing 3                                                                        | 10.1                   | 13                      | 18                      | 13                  | 3                      | 9                          |
| 350               | 3706503     | RAP1GAP2    | 17   | RAP1 GTPase activating protein 2                                                              | 8.4                    | 24                      | 13                      | 13                  | 1                      | 31                         |
| 353               | 2793418     | MFAP3L      | 4    | microfibrillar-associated protein 3-like                                                      | 8.2                    | 26                      | 13                      | 13                  | 4                      | 15                         |
| 354               | 3543163     | RGS6        | 14   | regulator of G-protein signaling 6                                                            | 7.5                    | 13                      | 17                      | 13                  | 4                      | 28                         |
| 356               | 2650466     | PPM1L       | 3    | protein phosphatase, Mg <sup>2+</sup> /Mn <sup>2+</sup> dependent, 1L                         | 7.9                    | 21                      | 13                      | 13                  | 1                      | 8                          |
| 357               | 2460337     | C1orf198    | 1    | chromosome 1 open reading frame 198                                                           | 7.9                    | 13                      | 13                      | 13                  | 1                      | 18                         |
| 361               | 3300672     | MYOF        | 10   | myoferlin                                                                                     | 8.0                    | 39                      | 13                      | 13                  | 7                      | 59                         |
| 365               | 3992417     | FHL1        | X    | four and a half LIM domains 1                                                                 | 9.1                    | 13                      | 17                      | 13                  | 3                      | 13                         |
| 370               | 3105616     | CA2         | 8    | carbonic anhydrase II                                                                         | 10.0                   | 13                      | 23                      | 13                  | 4                      | 10                         |
| 378               | 3445138     | HEBP1       | 12   | heme binding protein 1 zeta-chain (TCR) associated protein kinase                             | 8.5                    | 13                      | 20                      | 13                  | 1                      | 8                          |
| 381               | 2495212     | ZAP70       | 2    | 70kDa                                                                                         | 9.4                    | 24                      | 13                      | 13                  | 2                      | 18                         |
| 382               | 3021161     | C7orf58     | 7    | chromosome 7 open reading frame 58 protein kinase, cAMP-dependent, regulatory,                | 8.9                    | 76                      | 13                      | 13                  | 1                      | 3                          |
| 383               | 3018402     | PRKAR2B     | 7    | type II, beta                                                                                 | 8.9                    | 174                     | 13                      | 13                  | 4                      | 20                         |

| Rank <sup>a</sup> | Probeset ID | Gene Symbol | Chr. | Description                                                                        | Mean PBMC <sup>b</sup> | PBMC /LCL <sup>c</sup> | PBMC /LCL <sup>c</sup> | Min FC <sup>d</sup> | Det. exon s <sup>e</sup> | Tot. no. exon s <sup>f</sup> |
|-------------------|-------------|-------------|------|------------------------------------------------------------------------------------|------------------------|------------------------|------------------------|---------------------|--------------------------|------------------------------|
| 384               | 2940204     | F13A1       | 6    | coagulation factor XIII, A1 polypeptide                                            | 13.6                   | 25                     | 13                     | 13                  | 1                        | 2                            |
| 386               | 2647915     | MED12L      | 3    | mediator complex subunit 12-like                                                   | 7.4                    | 13                     | 17                     | 13                  | 1                        | 53                           |
| 387               | 3241656     | CCDC7       | 10   | chromosome 10 open reading frame 68                                                | 9.8                    | 25                     | 13                     | 13                  | 1                        | 23                           |
| 389               | 3291001     | ANK3        | 10   | ankyrin 3, node of Ranvier (ankyrin G)                                             | 8.3                    | 46                     | 13                     | 13                  | 2                        | 66                           |
| 391               | 3854965     | LRRC25      | 19   | leucine rich repeat containing 25                                                  | 9.0                    | 18                     | 13                     | 13                  | 3                        | 16                           |
| 392               | 2486279     | MEIS1       | 2    | Meis homeobox 1                                                                    | 6.3                    | 16                     | 13                     | 13                  | 5                        | 18                           |
| 393               | 3451890     | NELL2       | 12   | NEL-like 2 (chicken)                                                               | 7.0                    | 81                     | 13                     | 13                  | 2                        | 28                           |
| 396               | 2667048     | EOMES       | 3    | comesodermin homolog (Xenopus laevis)                                              | 6.1                    | 23                     | 12                     | 12                  | 2                        | 20                           |
| 397               | 3735094     | LOC643008   | 17   | hypothetical protein LOC643008 transcription factor 7 (T-cell specific, HMG-5 box) | 8.3                    | 38                     | 12                     | 12                  | 1                        | 6                            |
| 398               | 2829214     | TCF7        | 5    | box)                                                                               | 12.8                   | 18                     | 12                     | 12                  | 2                        | 24                           |
| 401               | 2635754     | CD96        | 3    | CD96 molecule                                                                      | 6.9                    | 15                     | 12                     | 12                  | 1                        | 22                           |
| 410               | 3338558     | CTTN        | 11   | cortactin                                                                          | 7.0                    | 12                     | 17                     | 12                  | 1                        | 27                           |
|                   |             | TMEM176     |      |                                                                                    |                        |                        |                        |                     |                          |                              |
| 411               | 3031638     | A           | 7    | transmembrane protein 176A                                                         | 9.7                    | 83                     | 12                     | 12                  | 1                        | 7                            |
| 412               | 3062102     | PKD4        | 7    | pyruvate dehydrogenase kinase, isozyme 4                                           | 9.6                    | 141                    | 12                     | 12                  | 4                        | 16                           |
| 413               | 3989844     | SH2D1A      | X    | SH2 domain containing 1A sulfotransferase family, cytosolic, 1A, phenol-           | 7.5                    | 31                     | 12                     | 12                  | 1                        | 9                            |
| 416               | 3656058     | SULT1A3     | 16   | preferring, member 3                                                               | 10.4                   | 12                     | 17                     | 12                  | 2                        | 23                           |
| 417               | 3936068     | IL17RA      | 22   | interleukin 17 receptor A                                                          | 12.4                   | 12                     | 23                     | 12                  | 3                        | 18                           |
| 418               | 3349364     | NCAM1       | 11   | neural cell adhesion molecule 1                                                    | 8.0                    | 23                     | 12                     | 12                  | 2                        | 20                           |
| 420               | 3849006     | PRAM1       | 19   | PML-RARA regulated adaptor molecule 1                                              | 10.2                   | 41                     | 12                     | 12                  | 1                        | 14                           |
| 421               | 3832262     | SPINT2      | 19   | serine peptidase inhibitor, Kunitz type, 2                                         | 10.7                   | 20                     | 12                     | 12                  | 2                        | 11                           |
| 422               | 3946110     | GRAP2       | 22   | GRB2-related adaptor protein 2                                                     | 6.7                    | 31                     | 12                     | 12                  | 1                        | 12                           |
| 424               | 3456719     | ZNF385A     | 12   | zinc finger protein 385A                                                           | 9.3                    | 12                     | 24                     | 12                  | 3                        | 19                           |
| 430               | 3724631     | C17orf57    | 17   | chromosome 17 open reading frame 57                                                | 9.2                    | 12                     | 33                     | 12                  | 3                        | 34                           |
| 433               | 3482629     | WASF3       | 13   | WAS protein family, member 3                                                       | 7.6                    | 23                     | 12                     | 12                  | 1                        | 21                           |
| 434               | 3901318     | CST3        | 20   | cystatin C                                                                         | 13.7                   | 23                     | 12                     | 12                  | 2                        | 9                            |
| 435               | 2592550     | SDPR        | 2    | serum deprivation response leukocyte-associated immunoglobulin-like                | 9.9                    | 12                     | 13                     | 12                  | 3                        | 7                            |
| 437               | 3870829     | LAIR1       | 19   | receptor 1 killer cell immunoglobulin-like receptor, two                           | 8.5                    | 32                     | 12                     | 12                  | 2                        | 14                           |
| 438               | 4052974     | KIR2DL2     | 19   | domains, long cytoplasmic tail, 2                                                  | 8.5                    | 58                     | 12                     | 12                  | 3                        | 5                            |
| 441               | 2353750     | CD101       | 1    | CD101 molecule                                                                     | 10.4                   | 22                     | 12                     | 12                  | 1                        | 13                           |
| 445               | 4017409     | TSC22D3     | X    | TSC22 domain family, member 3                                                      | 11.5                   | 12                     | 16                     | 12                  | 3                        | 15                           |
| 446               | 3815247     | CFD         | 19   | complement factor D (adipsin) purinergic receptor P2X, ligand-gated ion            | 10.9                   | 12                     | 16                     | 12                  | 1                        | 8                            |
| 454               | 3741775     | P2RX1       | 17   | channel, 1                                                                         | 7.2                    | 12                     | 11                     | 11                  | 2                        | 18                           |
| 455               | 3069097     | TFEC        | 7    | transcription factor EC                                                            | 9.9                    | 31                     | 11                     | 11                  | 1                        | 12                           |
| 465               | 3908374     | SULF2       | 20   | sulfatase 2 solute carrier family 24 (sodium/potassium/                            | 10.6                   | 20                     | 11                     | 11                  | 1                        | 28                           |
| 466               | 3548890     | SLC24A4     | 14   | calcium exchanger), member 4                                                       | 7.4                    | 26                     | 11                     | 11                  | 1                        | 21                           |
| 469               | 2360199     | AQP10       | 1    | aquaporin 10                                                                       | 9.3                    | 19                     | 11                     | 11                  | 1                        | 13                           |
| 472               | 2320423     | AGTRAP      | 1    | angiotensin II receptor-associated protein                                         | 10.5                   | 11                     | 17                     | 11                  | 1                        | 7                            |
| 477               | 3995427     | ZNF185      | X    | zinc finger protein 185 (LIM domain)                                               | 9.4                    | 24                     | 11                     | 11                  | 1                        | 21                           |
| 478               | 3422857     | GLIPR1      | 12   | GLI pathogenesis-related 1                                                         | 13.3                   | 12                     | 11                     | 11                  | 2                        | 8                            |
| 479               | 2669981     | CX3CR1      | 3    | chemokine (C-X3-C motif) receptor 1                                                | 13.2                   | 622                    | 11                     | 11                  | 1                        | 3                            |
| 484               | 2619313     | VIPR1       | 3    | vasoactive intestinal peptide receptor 1                                           | 6.7                    | 17                     | 11                     | 11                  | 1                        | 16                           |
| 487               | 3870999     | GP6         | 19   | glycoprotein VI (platelet)                                                         | 7.9                    | 27                     | 11                     | 11                  | 1                        | 13                           |
| 489               | 2739327     | EGF         | 4    | epidermal growth factor                                                            | 8.2                    | 33                     | 11                     | 11                  | 1                        | 33                           |
| 490               | 2662349     | CAMK1       | 3    | calcium/calmodulin-dependent protein kinase I                                      | 8.9                    | 11                     | 13                     | 11                  | 2                        | 14                           |
| 491               | 2623936     | STAB1       | 3    | stabilin 1 leukocyte immunoglobulin-like receptor,                                 | 10.9                   | 18                     | 11                     | 11                  | 4                        | 79                           |
| 492               | 3841406     | LILRA2      | 19   | subfamily A (with TM domain), member 2 cytochrome P450, family 2, subfamily S,     | 12.5                   | 84                     | 11                     | 11                  | 1                        | 12                           |
| 494               | 3834031     | CYP2S1      | 19   | polypeptide 1                                                                      | 8.3                    | 13                     | 11                     | 11                  | 3                        | 20                           |
| 496               | 2442621     | CD247       | 1    | CD247 molecule                                                                     | 10.1                   | 175                    | 11                     | 11                  | 1                        | 12                           |
| 498               | 3870403     | NLRP12      | 19   | NLR family, pyrin domain containing 12                                             | 9.4                    | 45                     | 11                     | 11                  | 3                        | 23                           |

<sup>a</sup>rank of the top probeset of the gene, according to minimum fold change.

<sup>b</sup>Mean of the top probeset of the gene in RMA units,  $\log_2$  scale.

<sup>c</sup>Fold change ratio of gene expression between PBMC and LCL or between PBMC and PAX for the top probeset of the gene

<sup>d</sup>Minimum fold change of the top probeset of the gene

<sup>e</sup>Number of exons of the gene with  $\geq 8$  minimum fold change

<sup>f</sup>Total number of exons of the gene in the annotation

Supplementary Table 4. Gene ontology categories for genes associated with lymphocyte counts in PAX and PBMC, as determined by GOrilla.

| GO ID       | GO Category                                                           | P-value  | Number of significant genes | Number of genes in category |
|-------------|-----------------------------------------------------------------------|----------|-----------------------------|-----------------------------|
| <b>PAX</b>  |                                                                       |          |                             |                             |
| GO:0044260  | cellular macromolecule metabolic process                              | 2.60E-10 | 212                         | 3841                        |
| GO:0090304  | nucleic acid metabolic process                                        | 2.95E-10 | 125                         | 1911                        |
| GO:0006396  | RNA processing                                                        | 4.08E-10 | 53                          | 552                         |
| GO:0034660  | ncRNA metabolic process                                               | 2.04E-09 | 32                          | 253                         |
| GO:0016070  | RNA metabolic process                                                 | 4.61E-09 | 100                         | 1477                        |
| GO:0043170  | macromolecule metabolic process                                       | 1.00E-08 | 227                         | 4358                        |
| GO:0006139  | nucleobase, nucleoside, nucleotide and nucleic acid metabolic process | 6.06E-08 | 139                         | 2393                        |
| GO:0050863  | regulation of T cell activation                                       | 1.65E-06 | 21                          | 169                         |
| GO:0034641  | cellular nitrogen compound metabolic process                          | 1.68E-06 | 149                         | 2761                        |
| GO:0006807  | nitrogen compound metabolic process                                   | 2.05E-06 | 153                         | 2863                        |
| GO:0044237  | cellular metabolic process                                            | 2.17E-06 | 262                         | 5514                        |
| GO:0031294  | lymphocyte costimulation                                              | 2.43E-06 | 12                          | 61                          |
| GO:0031295  | T cell costimulation                                                  | 2.43E-06 | 12                          | 61                          |
| GO:0002768  | immune response-regulating cell surface receptor signaling pathway    | 4.99E-06 | 15                          | 100                         |
| GO:0008380  | RNA splicing                                                          | 5.09E-06 | 26                          | 257                         |
| <b>PBMC</b> |                                                                       |          |                             |                             |
| GO:0051251  | positive regulation of lymphocyte activation                          | 3.13E-10 | 13                          | 165                         |
| GO:0050865  | regulation of cell activation                                         | 3.92E-10 | 15                          | 243                         |
| GO:0051249  | regulation of lymphocyte activation                                   | 6.91E-10 | 14                          | 213                         |
| GO:0002696  | positive regulation of leukocyte activation                           | 6.97E-10 | 13                          | 176                         |
| GO:0050867  | positive regulation of cell activation                                | 9.20E-10 | 13                          | 180                         |
| GO:0048583  | regulation of response to stimulus                                    | 1.96E-09 | 35                          | 1571                        |
| GO:0002694  | regulation of leukocyte activation                                    | 2.23E-09 | 14                          | 233                         |
| GO:0002429  | immune response-activating cell surface receptor signaling pathway    | 2.53E-09 | 10                          | 96                          |
| GO:0002768  | immune response-regulating cell surface receptor signaling pathway    | 3.79E-09 | 10                          | 100                         |
| GO:0050863  | regulation of T cell activation                                       | 5.13E-09 | 12                          | 169                         |
| GO:0050870  | positive regulation of T cell activation                              | 5.44E-09 | 11                          | 135                         |
| GO:0002682  | regulation of immune system process                                   | 7.69E-09 | 21                          | 628                         |
| GO:0002376  | immune system process                                                 | 8.53E-09 | 25                          | 893                         |
| GO:0050851  | antigen receptor-mediated signaling pathway                           | 2.14E-08 | 9                           | 89                          |
| GO:0001775  | cell activation                                                       | 3.14E-08 | 17                          | 441                         |

Supplementary Table 5. Gene ontology categories for genes associated with neutrophil counts in PAX.

| GO ID      | GO Category                                                        | P-value  | Number of significant genes | Number of genes in category |
|------------|--------------------------------------------------------------------|----------|-----------------------------|-----------------------------|
| GO:0006952 | defense response                                                   | 3.64E-12 | 43                          | 602                         |
| GO:0002376 | immune system process                                              | 9.97E-09 | 47                          | 893                         |
| GO:0006955 | immune response                                                    | 1.84E-08 | 34                          | 539                         |
| GO:0050776 | regulation of immune response                                      | 1.30E-07 | 27                          | 397                         |
| GO:0002682 | regulation of immune system process                                | 2.37E-07 | 35                          | 628                         |
| GO:0007165 | signal transduction                                                | 7.48E-07 | 99                          | 2920                        |
| GO:0002532 | production of molecular mediator involved in inflammatory response | 1.02E-06 | 4                           | 5                           |
| GO:0071260 | cellular response to mechanical stimulus                           | 1.73E-06 | 8                           | 40                          |
| GO:0006954 | inflammatory response                                              | 2.08E-06 | 19                          | 251                         |
| GO:0009607 | response to biotic stimulus                                        | 2.79E-06 | 26                          | 437                         |
| GO:0051716 | cellular response to stimulus                                      | 5.20E-06 | 109                         | 3450                        |
| GO:0045087 | innate immune response                                             | 5.81E-06 | 17                          | 221                         |
| GO:0050896 | response to stimulus                                               | 8.65E-06 | 146                         | 5053                        |
| GO:0045088 | regulation of innate immune response                               | 9.05E-06 | 14                          | 160                         |
| GO:0071214 | cellular response to abiotic stimulus                              | 1.08E-05 | 9                           | 66                          |

Supplementary Table 6. Gene ontology categories for genes associated with monocyte counts in PBMC.

| GO ID      | GO Category                                     | P-value  | Number of significant genes | Number of genes in category |
|------------|-------------------------------------------------|----------|-----------------------------|-----------------------------|
| GO:0002376 | immune system process                           | 2.61E-09 | 26                          | 893                         |
| GO:0006955 | immune response                                 | 2.50E-08 | 19                          | 539                         |
| GO:0050896 | response to stimulus                            | 1.14E-06 | 64                          | 5053                        |
| GO:0007165 | signal transduction                             | 5.56E-06 | 43                          | 2920                        |
| GO:0051716 | cellular response to stimulus                   | 3.27E-05 | 46                          | 3450                        |
| GO:0050776 | regulation of immune response                   | 5.16E-05 | 12                          | 397                         |
| GO:0006952 | defense response                                | 5.39E-05 | 15                          | 602                         |
| GO:0016046 | detection of fungus                             | 5.78E-05 | 2                           | 2                           |
| GO:0016064 | immunoglobulin mediated immune response         | 6.85E-05 | 3                           | 11                          |
| GO:0002682 | regulation of immune system process             | 8.68E-05 | 15                          | 628                         |
| GO:0050778 | positive regulation of immune response          | 1.81E-04 | 9                           | 262                         |
| GO:0032732 | positive regulation of interleukin-1 production | 1.85E-04 | 3                           | 15                          |
| GO:0019724 | B cell mediated immunity                        | 1.85E-04 | 3                           | 15                          |
| GO:0080134 | regulation of response to stress                | 2.24E-04 | 12                          | 464                         |
| GO:0045088 | regulation of innate immune response            | 2.26E-04 | 7                           | 160                         |



Supplementary Table 7. The female-to-male overexpression effect of probesets targeting *XIST* gene.

| Probeset ID <sup>¶</sup> | CL<br>Effect* | PAX<br>Effect* | PBMC<br>Effect* |
|--------------------------|---------------|----------------|-----------------|
| 4012533                  | 2.84          | 7.54           | 4.23            |
| 4012534                  | 6.57          | 7.26           | 7.88            |
| 4012535                  | 6.17          | 7.77           | 7.43            |
| 4012536                  | 7.95          | 9.05           | 8.40            |
| 4012537                  | 5.93          | 7.78           | 7.21            |
| 4012538                  | 3.29          | 4.77           | 4.53            |
| 4012540                  | 6.38          | 7.29           | 7.31            |
| 4012546                  | 6.83          | 7.37           | 7.67            |
| 4012547                  | 0.23          | 1.71           | 1.03            |
| 4012548                  | 3.57          | 6.77           | 4.89            |
| 4012567                  | 1.78          | 9.46           | 1.88            |
| 4012568                  | 4.53          | 8.51           | 5.14            |
| 4012569                  | 3.51          | 6.75           | 5.09            |
| 4012570                  | 5.75          | 8.39           | 6.81            |
| 4012571                  | 4.55          | 6.51           | 6.10            |
| Mean                     | 4.66          | 7.13           | 5.71            |
| Fold change              | 25.25         | 139.99         | 52.19           |

\*Effect is in log<sub>2</sub> scale. Fold change is 2<sup>effect</sup>.

¶Probesets in the Affymetrix Extended set.

Supplementary Table 8. Autosomal genes associated with sex.

| Transcript cluster ID | Gene Symbol  | Chr. | Description                                                                 | Effect LCL* | Effect PAX* | Effect PBMC* |
|-----------------------|--------------|------|-----------------------------------------------------------------------------|-------------|-------------|--------------|
| 3631397               | UACA         | 15   | uveal autoantigen with coiled-coil domains and ankyrin repeats              | 0.43        | 0.29        | 0.14         |
| 2880361               | JAKMIP2      | 5    | janus kinase and microtubule interacting protein 2                          | 0.25        | 0.60        | 0.69         |
| 3712675               | RAI1         | 17   | retinoic acid induced 1                                                     | -0.22       | -0.10       | 0.13         |
| 3373946               | TIMM10       | 11   | translocase of inner mitochondrial membrane 10 homolog (yeast)              | 0.17        | 0.15        | 0.36         |
| 3725602               | ABI3         | 17   | ABI family, member 3                                                        | -0.16       | 0.03        | 0.40         |
| 2439101               | FCRL1        | 1    | Fc receptor-like 1                                                          | -0.12       | -0.58       | -0.81        |
| 2893109               | LOC100129033 | 6    | QIQN5815                                                                    | -0.10       | -0.58       | 0.07         |
| 3857811               | C19orf12     | 19   | chromosome 19 open reading frame 12                                         | 0.08        | 0.20        | 0.30         |
| 3223687               | PHF19        | 9    | PHD finger protein 19                                                       | 0.04        | 0.03        | 0.31         |
| 3264621               | TCF7L2       | 10   | transcription factor 7-like 2 (T-cell specific, HMG-box)                    | -0.04       | 0.22        | 0.61         |
| 3417184               | SUOX         | 12   | sulfite oxidase                                                             | -0.04       | 0.06        | 0.35         |
| 3543935               | COQ6         | 14   | coenzyme Q6 homolog, monooxygenase (S. cerevisiae)                          | -0.04       | -0.26       | 0.06         |
| 2607055               | PASK         | 2    | PAS domain containing serine/threonine kinase                               | 0.04        | -0.18       | -0.21        |
| 3870990               | GP6          | 19   | glycoprotein VI (platelet)                                                  | 0.04        | -0.36       | -0.24        |
| 3534866               | MGAT2        | 14   | mannosyl (alpha-1,6-)-glycoprotein beta-1,2-N-acetylglucosaminyltransferase | 0.02        | -0.04       | 0.26         |
| 3940992               | ASPHD2       | 22   | aspartate beta-hydroxylase domain containing 2                              | 0.01        | 0.15        | 0.40         |

\*In log<sub>2</sub> RMA units. Positive effects are highly expressed in males.

Partial list, genes are significant in at least one RNA source, FDR≤0.2.

Supplementary Table 9. Genes that might be associated with age, having p-values < 0.05 for all three RNA sources.

| Transcript Cluster ID | Gene Symbol | Description                                                | Chr. | CL P-value | CL effects | PAX P-value | PAX effects | PBMC P-value | PBMC effects |
|-----------------------|-------------|------------------------------------------------------------|------|------------|------------|-------------|-------------|--------------|--------------|
| 3743906               | TP53        | tumor protein p53                                          | 17   | 0.0062     | 0.0104     | 0.0445      | -0.0135     | 0.0236       | -0.0137      |
| 3127334               | REEP4       | receptor accessory protein 4                               | 8    | 0.0142     | -0.0162    | 0.0054      | -0.0276     | 0.0009       | -0.0219      |
| 2673730               | PRKAR2A     | protein kinase, cAMP-dependent, regulatory, type II, alpha | 3    | 0.0252     | -0.0121    | 0.0063      | -0.0199     | 0.0295       | -0.0111      |
| 2821347               | ERAP2       | endoplasmic reticulum aminopeptidase 2                     | 5    | 0.0471     | -0.0673    | 0.0042      | -0.0563     | 0.0171       | -0.0719      |
| 3829313               | CEBPG       | CCAAT/enhancer binding protein (C/EBP), gamma              | 19   | 0.0186     | -0.0118    | 0.0212      | 0.0208      | 0.0246       | -0.0104      |

Supplementary Table 10. Selected genes with known associations with HDL, having p-values  $\leq 0.05$  for either PAX or PBMC.

| Transcript Cluster ID | Gene Symbol          | Description                                             | Chr. | LCL P-value | CL effects | PAX P-value | PAX effects | PBMC P-value | PBMC effects |
|-----------------------|----------------------|---------------------------------------------------------|------|-------------|------------|-------------|-------------|--------------|--------------|
| 3682182               | ABCC6 <sup>(3)</sup> | ATP-binding cassette, sub-family C (CFTR/MRP), member 6 | 16   | 0.1896      | -0.0053    | 0.0371      | -0.0100     | 0.5424       | -0.0027      |
| 3392986               | APOA1 <sup>(4)</sup> | apolipoprotein A-I                                      | 11   | 0.1835      | -0.0049    | 0.0013      | -0.0146     | 0.9605       | 0.0002       |
| 3350655               | APOC3 <sup>(4)</sup> | apolipoprotein C-III                                    | 11   | 0.7637      | -0.0013    | 0.3037      | 0.0064      | 0.0235       | -0.0106      |
| 3375545               | FADS1 <sup>(4)</sup> | fatty acid desaturase 1                                 | 11   | 0.4475      | -0.0030    | 0.0233      | -0.0097     | 0.0124       | -0.0087      |
| 3821015               | LDLR <sup>(4)</sup>  | low density lipoprotein receptor                        | 19   | 0.7011      | 0.0011     | 0.0346      | -0.0076     | 0.0008       | -0.0123      |
| 3061997               | PON2 <sup>(1)</sup>  | paraoxonase 2                                           | 7    | 0.5242      | -0.0034    | 0.2844      | 0.0049      | 0.0010       | 0.0112       |

Supplementary Table 11. List of 423 exons with  $FDR \leq 0.05$  for the participant effect and standard deviation across participant of at least 2 fold for this effect. The probesets are sorted by the F-score of the participant.

| Probeset ID <sup>a</sup> | Gene symbol | Chr. | Description                                                                                             | F(subject) <sub>b</sub> | Det. exons <sup>c</sup> | Tot. no. exons <sup>d</sup> |
|--------------------------|-------------|------|---------------------------------------------------------------------------------------------------------|-------------------------|-------------------------|-----------------------------|
| 4030178                  | DDX3Y       | Y    | DEAD (Asp-Glu-Ala-Asp) box polypeptide 3, Y-linked                                                      | 85.2                    | 18                      | 22                          |
| 4035087                  | UTY         | Y    | ubiquitously transcribed tetratricopeptide repeat gene, Y-linked                                        | 74.4                    | 33                      | 52                          |
| 4030146                  | USP9Y       | Y    | ubiquitin specific peptidase 9, Y-linked                                                                | 73.5                    | 34                      | 53                          |
| 4028553                  | RPS4Y1      | Y    | ribosomal protein S4, Y-linked 1                                                                        | 46.4                    | 12                      | 12                          |
| 3764386                  | SUPT4H1     | 17   | suppressor of Ty 4 homolog 1 ( <i>S. cerevisiae</i> )                                                   | 46.0                    | 1                       | 11                          |
| 4048279                  | HLA-DRB1    | 6    | major histocompatibility complex, class II, DR beta 1                                                   | 45.9                    | 4                       | 8                           |
| 2350995                  | GSTM1       | 1    | glutathione S-transferase mu 1                                                                          | 44.4                    | 3                       | 14                          |
| 3717652                  | ZNF207      | 17   | zinc finger protein 207                                                                                 | 43.7                    | 1                       | 24                          |
| 3505812                  | PARP4       | 13   | poly (ADP-ribose) polymerase family, member 4                                                           | 41.3                    | 1                       | 43                          |
| 4031141                  | EIF1AY      | Y    | eukaryotic translation initiation factor 1A, Y-linked                                                   | 41.2                    | 7                       | 9                           |
| 2825746                  | HSD17B4     | 5    | hydroxysteroid (17-beta) dehydrogenase 4                                                                | 38.9                    | 1                       | 26                          |
| 4028588                  | ZFY         | Y    | zinc finger protein, Y-linked                                                                           | 35.4                    | 5                       | 10                          |
| 3988474                  | DOCK11      | X    | dedicator of cytokinesis 11                                                                             | 34.7                    | 1                       | 57                          |
| 3036926                  | ACTB        | 7    | actin, beta                                                                                             | 34.7                    | 1                       | 11                          |
| 3432446                  | OAS1        | 12   | 2',5'-oligoadenylate synthetase 1, 40/46kDa                                                             | 31.5                    | 1                       | 15                          |
| 2367199                  | BAT2L2      | 1    | HLA-B associated transcript 2-like 2                                                                    | 31.3                    | 1                       | 48                          |
| 3304629                  | NT5C2       | 10   | 5'-nucleotidase, cytosolic II                                                                           | 28.6                    | 1                       | 22                          |
| 2984580                  | SFT2D1      | 6    | SFT2 domain containing 1                                                                                | 28.4                    | 1                       | 9                           |
| 3462877                  | NAP1L1      | 12   | nucleosome assembly protein 1-like 1                                                                    | 27.9                    | 1                       | 22                          |
| 4028462                  | CD99        | Y    | CD99 molecule                                                                                           | 25.5                    | 1                       | 27                          |
| 4048249                  | HLA-DRB5    | 6    | major histocompatibility complex, class II, DR beta 5                                                   | 25.2                    | 5                       | 11                          |
| 2727952                  | EXOC1       | 4    | exocyst complex component 1                                                                             | 24.7                    | 1                       | 25                          |
| 3831276                  | ZNF146      | 19   | zinc finger protein 146                                                                                 | 24.5                    | 1                       | 8                           |
| 4025365                  | IDS         | X    | iduronate 2-sulfatase                                                                                   | 23.7                    | 1                       | 20                          |
| 2469139                  | TAF1B       | 2    | TATA box binding protein (TBP)-associated factor, RNA polymerase I, B, 63kDa                            | 23.5                    | 1                       | 17                          |
| 3067144                  | COG5        | 7    | component of oligomeric golgi complex 5                                                                 | 23.4                    | 1                       | 33                          |
| 2366603                  | C1orf112    | 1    | SCY1-like 3 ( <i>S. cerevisiae</i> )                                                                    | 23.1                    | 1                       | 36                          |
| 2903428                  | HLA-DPB1    | 6    | major histocompatibility complex, class II, DP beta 1                                                   | 23.1                    | 1                       | 8                           |
| 2367974                  | RABGAP1L    | 1    | RAB GTPase activating protein 1-like                                                                    | 21.6                    | 1                       | 47                          |
| 2418460                  | CRYZ        | 1    | crystallin, zeta (quinone reductase)                                                                    | 21.3                    | 1                       | 15                          |
| 3105938                  | CPNE3       | 8    | copine III                                                                                              | 20.2                    | 1                       | 22                          |
| 2989124                  | ZDHHC4      | 7    | zinc finger, DHHC-type containing 4                                                                     | 19.4                    | 1                       | 13                          |
| 2603075                  | SP110       | 2    | SP110 nuclear body protein                                                                              | 19.4                    | 1                       | 24                          |
| 3975522                  | KDM6A       | X    | lysine (K)-specific demethylase 6A                                                                      | 19.1                    | 1                       | 42                          |
| 2821406                  | ERAP2       | 5    | endoplasmic reticulum aminopeptidase 2                                                                  | 18.8                    | 22                      | 27                          |
| 3004680                  | ZNF138      | 7    | zinc finger protein 138                                                                                 | 18.7                    | 1                       | 15                          |
| 3395427                  | HSPA8       | 11   | heat shock 70kDa protein 8                                                                              | 18.5                    | 1                       | 17                          |
| 3238248                  | MLLT10      | 10   | myeloid/lymphoid or mixed-lineage leukemia (trithorax homolog, <i>Drosophila</i> ); translocated to, 10 | 17.7                    | 1                       | 38                          |
| 4015713                  | BTK         | X    | Bruton agammaglobulinemia tyrosine kinase                                                               | 17.5                    | 1                       | 24                          |
| 2518349                  | ITGA4       | 2    | integrin, alpha 4 (antigen CD49D, alpha 4 subunit of VLA-4 receptor)                                    | 17.4                    | 1                       | 40                          |
| 3707765                  | MIS12       | 17   | MIS12, MIND kinetochore complex component, homolog ( <i>S. pombe</i> )                                  | 16.5                    | 1                       | 5                           |
| 2816364                  | IQGAP2      | 5    | IQ motif containing GTPase activating protein 2                                                         | 16.5                    | 1                       | 45                          |

| Probeset ID <sup>a</sup> | Gene symbol | Chr. | Description                                                        | F(subject) <sup>b</sup> | Det. exons <sup>c</sup> | Tot. no. exons <sup>d</sup> |
|--------------------------|-------------|------|--------------------------------------------------------------------|-------------------------|-------------------------|-----------------------------|
| 3517836                  | KLF12       | 13   | Kruppel-like factor 12                                             | 16.1                    | 1                       | 23                          |
| 2542747                  | LAPTM4A     | 2    | lysosomal protein transmembrane 4 alpha                            | 15.8                    | 1                       | 10                          |
| 2948952                  | HLA-B       | 6    | major histocompatibility complex, class I, B                       | 15.6                    | 1                       | 12                          |
| 2351023                  | GSTM5       | 1    | glutathione S-transferase mu 5                                     | 15.5                    | 1                       | 11                          |
| 3056088                  | BAZ1B       | 7    | bromodomain adjacent to zinc finger domain, 1B                     | 15.3                    | 1                       | 39                          |
| 3385778                  | CTSC        | 11   | cathepsin C                                                        | 15.2                    | 1                       | 15                          |
| 3932139                  | PSMG1       | 21   | proteasome (prosome, macropain) assembly chaperone 1               | 14.9                    | 1                       | 11                          |
| 2961826                  | PHIP        | 6    | pleckstrin homology domain interacting protein                     | 14.9                    | 1                       | 48                          |
| 3879393                  | PLK1S1      | 20   | polo-like kinase 1 substrate 1                                     | 14.4                    | 1                       | 19                          |
| 2723770                  | TBC1D1      | 4    | TBC1 (tre-2/USP6, BUB2, cdc16) domain family, member 1             | 14.4                    | 1                       | 32                          |
| 3576822                  | TRIP11      | 14   | thyroid hormone receptor interactor 11                             | 14.3                    | 1                       | 30                          |
| 2903265                  | HLA-DQA2    | 6    | major histocompatibility complex, class II, DQ alpha 2             | 14.3                    | 1                       | 5                           |
| 3996335                  | RPL10       | X    | ribosomal protein L10                                              | 14.2                    | 1                       | 14                          |
| 3485880                  | EXOSC8      | 13   | exosome component 8                                                | 14.2                    | 1                       | 12                          |
| 3584495                  | SNRPN       | 15   | small nuclear ribonucleoprotein polypeptide N                      | 14.0                    | 1                       | 23                          |
| 4031106                  | CYorf15B    | Y    | chromosome Y open reading frame 15B                                | 13.6                    | 10                      | 18                          |
| 3425122                  | C12orf29    | 12   | chromosome 12 open reading frame 29                                | 13.5                    | 1                       | 11                          |
| 2530554                  | MFF         | 2    | mitochondrial fission factor                                       | 13.2                    | 1                       | 14                          |
| 3243742                  | BMS1        | 10   | BMS1 homolog, ribosome assembly protein (yeast)                    | 13.2                    | 1                       | 31                          |
| 3169339                  | ALDH1B1     | 9    | aldehyde dehydrogenase 1 family, member B1                         | 13.1                    | 1                       | 10                          |
| 2739191                  | CCDC109B    | 4    | coiled-coil domain containing 109B                                 | 13.0                    | 1                       | 12                          |
| 2571102                  | ANAPC1      | 2    | anaphase promoting complex subunit 1                               | 12.8                    | 1                       | 70                          |
| 3046682                  | TRGV5       | 7    | TCR gamma alternate reading frame protein                          | 12.7                    | 1                       | 1                           |
| 2446619                  | STX6        | 1    | syntaxin 6                                                         | 12.7                    | 1                       | 11                          |
| 4031175                  | RPS4Y2      | Y    | ribosomal protein S4, Y-linked 2                                   | 12.7                    | 2                       | 7                           |
| 3458101                  | NACA        | 12   | nascent polypeptide-associated complex alpha subunit               | 12.0                    | 1                       | 10                          |
| 2350940                  | GSTM4       | 1    | glutathione S-transferase mu 4                                     | 11.9                    | 1                       | 12                          |
| 2676049                  | WDR82       | 3    | WD repeat domain 82                                                | 11.6                    | 1                       | 12                          |
| 3907879                  | ELMO2       | 20   | engulfment and cell motility 2                                     | 11.4                    | 1                       | 27                          |
| 3759912                  | LRRRC37A4   | 17   | leucine rich repeat containing 37, member A4 (pseudogene)          | 11.3                    | 3                       | 18                          |
| 3315556                  | PSMD13      | 11   | proteasome (prosome, macropain) 26S subunit, non-ATPase, 13        | 11.2                    | 1                       | 16                          |
| 2369585                  | SOAT1       | 1    | sterol O-acyltransferase 1                                         | 11.2                    | 1                       | 21                          |
| 2492088                  | KDM3A       | 2    | lysine (K)-specific demethylase 3A                                 | 10.8                    | 1                       | 35                          |
| 3003206                  | CCT6A       | 7    | chaperonin containing TCP1, subunit 6A (zeta 1)                    | 10.7                    | 1                       | 23                          |
| 2821249                  | CAST        | 5    | calpastatin                                                        | 10.7                    | 1                       | 42                          |
| 3641887                  | LINS1       | 15   | lines homolog 1 (Drosophila)                                       | 10.3                    | 1                       | 16                          |
| 3971880                  | EIF2S3      | X    | eukaryotic translation initiation factor 2, subunit 3 gamma, 52kDa | 10.3                    | 1                       | 15                          |
| 3850437                  | KRI1        | 19   | KRI1 homolog (S. cerevisiae)                                       | 10.1                    | 1                       | 24                          |
| 3908171                  | ZMYND8      | 20   | zinc finger, MYND-type containing 8                                | 10.0                    | 1                       | 33                          |
| 4029193                  | PRKY        | Y    | protein kinase, Y-linked                                           | 9.7                     | 3                       | 16                          |
| 2501343                  | LOC654433   | 2    | hypothetical LOC654433                                             | 9.6                     | 1                       | 8                           |
| 3487448                  | DNAJC15     | 13   | DnaJ (Hsp40) homolog, subfamily C, member 15                       | 9.4                     | 1                       | 8                           |
| 3462702                  | KRR1        | 12   | KRR1, small subunit (SSU) processome component, homolog (yeast)    | 9.2                     | 1                       | 17                          |
| 3742635                  | C17orf87    | 17   | chromosome 17 open reading frame 87                                | 9.0                     | 1                       | 6                           |
| 3140703                  | STAU2       | 8    | staufen, RNA binding protein, homolog 2 (Drosophila)               | 9.0                     | 1                       | 29                          |

| Probeset ID <sup>a</sup> | Gene symbol           | Chr. | Description                                                                                                     | F(subject) <sup>b</sup> | Det. exons <sup>c</sup> | Tot. no. exons <sup>d</sup> |
|--------------------------|-----------------------|------|-----------------------------------------------------------------------------------------------------------------|-------------------------|-------------------------|-----------------------------|
| 3920468                  | TTC3                  | 21   | tetratricopeptide repeat domain 3                                                                               | 8.9                     | 1                       | 57                          |
| 2473203                  | NCOA1                 | 2    | nuclear receptor coactivator 1                                                                                  | 8.8                     | 1                       | 34                          |
| 2421854                  | GBP3                  | 1    | guanylate binding protein 3                                                                                     | 8.8                     | 3                       | 17                          |
| 3784747                  | ELP2                  | 18   | elongation protein 2 homolog (S. cerevisiae)                                                                    | 8.8                     | 1                       | 26                          |
| 2337291                  | TTC4                  | 1    | tetratricopeptide repeat domain 4                                                                               | 8.7                     | 1                       | 15                          |
| 3823579                  | RAB8A                 | 19   | RAB8A, member RAS oncogene family                                                                               | 8.5                     | 1                       | 15                          |
| 2933558                  | TULP4                 | 6    | tubby like protein 4                                                                                            | 8.5                     | 1                       | 25                          |
| 2748229                  | KIAA0922              | 4    | KIAA0922                                                                                                        | 8.3                     | 1                       | 41                          |
| 2798575                  | SDHA                  | 5    | succinate dehydrogenase complex, subunit A, flavoprotein (Fp)                                                   | 8.3                     | 1                       | 19                          |
| 2950130                  | HLA-DQB2<br>LOC100130 | 6    | major histocompatibility complex, class II, DQ beta 2                                                           | 8.2                     | 1                       | 6                           |
| 3707605                  | 950                   | 17   | similar to hCG1991536                                                                                           | 8.2                     | 1                       | 9                           |
| 3711727                  | ZNF286A               | 17   | zinc finger protein 286A                                                                                        | 8.2                     | 1                       | 11                          |
| 3144774                  | RBM12B                | 8    | RNA binding motif protein 12B                                                                                   | 7.9                     | 1                       | 10                          |
| 2736280                  | SMARCAD1              | 4    | SWI/SNF-related, matrix-associated actin-dependent regulator of chromatin, subfamily a, containing DEAD/H box 1 | 7.8                     | 1                       | 29                          |
| 3063553                  | TRIM4                 | 7    | tripartite motif-containing 4                                                                                   | 7.7                     | 1                       | 15                          |
| 3417247                  | RPS26                 | 12   | ribosomal protein S26                                                                                           | 7.5                     | 2                       | 7                           |
| 3341092                  | ACER3                 | 11   | alkaline ceramidase 3                                                                                           | 7.5                     | 1                       | 16                          |
| 3724617                  | C17orf57              | 17   | chromosome 17 open reading frame 57                                                                             | 7.5                     | 1                       | 34                          |
| 2428814                  | PTPN22                | 1    | protein tyrosine phosphatase, non-receptor type 22 (lymphoid)                                                   | 7.4                     | 1                       | 26                          |
| 2800489                  | SRD5A1                | 5    | steroid-5-alpha-reductase, alpha polypeptide 1 (3-oxo-5 alpha-steroid delta 4-dehydrogenase alpha 1)            | 7.0                     | 1                       | 11                          |
| 3114095                  | WDR67                 | 8    | WD repeat domain 67                                                                                             | 7.0                     | 1                       | 27                          |
| 2413969                  | USP24                 | 1    | ubiquitin specific peptidase 24                                                                                 | 6.9                     | 1                       | 20                          |
| 3699056                  | RFWD3                 | 16   | ring finger and WD repeat domain 3                                                                              | 6.7                     | 1                       | 22                          |
| 3131752                  | RAB11FIP1             | 8    | RAB11 family interacting protein 1 (class I)                                                                    | 6.6                     | 1                       | 27                          |
| 2565924                  | ANKRD36B              | 2    | ankyrin repeat domain 36B                                                                                       | 6.3                     | 1                       | 17                          |
| 3857177                  | ZNF675                | 19   | zinc finger protein 675                                                                                         | 6.3                     | 1                       | 6                           |
| 3913564                  | DIDO1                 | 20   | death inducer-obliterator 1                                                                                     | 6.3                     | 1                       | 24                          |
| 3955109                  | GSTT1                 | 22   | glutathione S-transferase theta 1                                                                               | 6.2                     | 2                       | 8                           |
| 2925529                  | L3MBTL3               | 6    | l(3)mbt-like 3 (Drosophila)                                                                                     | 6.1                     | 1                       | 25                          |
| 3609657                  | MCTP2                 | 15   | multiple C2 domains, transmembrane 2                                                                            | 6.0                     | 1                       | 28                          |
| 2563435                  | RGPD1                 | 2    | RANBP2-like and GRIP domain containing 1                                                                        | 6.0                     | 1                       | 13                          |
| 3647874                  | ATF7IP2               | 16   | activating transcription factor 7 interacting protein 2                                                         | 6.0                     | 1                       | 16                          |
| 2708240                  | PARL                  | 3    | presenilin associated, rhomboid-like                                                                            | 6.0                     | 1                       | 13                          |
| 3895595                  | ADAM33                | 20   | ADAM metallopeptidase domain 33                                                                                 | 5.8                     | 1                       | 30                          |
| 3527423                  | PARP2                 | 14   | poly (ADP-ribose) polymerase 2                                                                                  | 5.7                     | 1                       | 21                          |
| 2531333                  | SP140L                | 2    | SP140 nuclear body protein-like                                                                                 | 5.6                     | 1                       | 21                          |
| 3363873                  | RRAS2                 | 11   | related RAS viral (r-ras) oncogene homolog 2                                                                    | 5.5                     | 1                       | 12                          |
| 3553120                  | ZNF839                | 14   | zinc finger protein 839                                                                                         | 5.2                     | 2                       | 12                          |
| 2670619                  | ULK4                  | 3    | unc-51-like kinase 4 (C. elegans)                                                                               | 5.0                     | 1                       | 28                          |
| 2421965                  | GBP7                  | 1    | guanylate binding protein 7                                                                                     | 5.0                     | 1                       | 18                          |
| 3262523                  | GSTO1                 | 10   | glutathione S-transferase omega 1                                                                               | 4.9                     | 1                       | 10                          |
| 3556431                  | METTL3                | 14   | methyltransferase like 3                                                                                        | 4.9                     | 1                       | 17                          |
| 3922843                  | PDE9A                 | 21   | phosphodiesterase 9A                                                                                            | 4.9                     | 1                       | 25                          |
| 3843221                  | ZNF548                | 19   | zinc finger protein 548                                                                                         | 4.9                     | 1                       | 9                           |
| 2327382                  | ATPIF1                | 1    | ATPase inhibitory factor 1                                                                                      | 4.8                     | 1                       | 10                          |
| 3274192                  | PITRM1                | 10   | pitrilysin metallopeptidase 1                                                                                   | 4.7                     | 1                       | 32                          |
| 3079177                  | TMEM176B              | 7    | transmembrane protein 176B                                                                                      | 4.6                     | 5                       | 9                           |
| 2484803                  | COMMD1                | 2    | copper metabolism (Murr1) domain containing 1                                                                   | 4.6                     | 1                       | 8                           |

| Probeset ID <sup>a</sup> | Gene symbol | Chr. | Description                                                                                                                   | F(subject) <sub>b</sub> | Det. exons <sup>c</sup> | Tot. no. exons <sup>d</sup> |
|--------------------------|-------------|------|-------------------------------------------------------------------------------------------------------------------------------|-------------------------|-------------------------|-----------------------------|
| 2812137                  | CWC27       | 5    | CWC27 spliceosome-associated protein homolog ( <i>S. cerevisiae</i> )                                                         | 4.5                     | 1                       | 19                          |
| 3429348                  | HSP90B1     | 12   | heat shock protein 90kDa beta (Grp94), member 1                                                                               | 4.5                     | 1                       | 20                          |
| 3207247                  | FLJ20444    | 9    | hypothetical protein FLJ20444                                                                                                 | 4.5                     | 1                       | 8                           |
| 2737340                  | DAPP1       | 4    | dual adaptor of phosphotyrosine and 3-phosphoinositides                                                                       | 4.4                     | 1                       | 13                          |
| 2405660                  | CSMD2       | 1    | CUB and Sushi multiple domains 2                                                                                              | 4.4                     | 1                       | 86                          |
| 3012413                  | AKAP9       | 7    | A kinase (PRKA) anchor protein (yotiao) 9                                                                                     | 4.4                     | 1                       | 73                          |
| 2666534                  | TOP2B       | 3    | topoisomerase (DNA) II beta 180kDa                                                                                            | 4.4                     | 1                       | 44                          |
| 3142386                  | FABP4       | 8    | fatty acid binding protein 4, adipocyte                                                                                       | 4.3                     | 1                       | 6                           |
| 2427222                  | GSTM3       | 1    | glutathione S-transferase mu 3 (brain)                                                                                        | 4.3                     | 2                       | 17                          |
| 2372958                  | TROVE2      | 1    | TROVE domain family, member 2                                                                                                 | 4.2                     | 1                       | 15                          |
| 3841856                  | KIR3DS1     | 19   | killer cell immunoglobulin-like receptor, two domains, short cytoplasmic tail, 4 phosphatidylinositol glycan anchor           | 4.2                     | 1                       | 14                          |
| 3811114                  | PIGN        | 18   | biosynthesis, class N                                                                                                         | 4.2                     | 1                       | 43                          |
| 2583647                  | RBMS1       | 2    | RNA binding motif, single stranded interacting protein 1                                                                      | 4.1                     | 1                       | 28                          |
| 3018413                  | PRKAR2B     | 7    | protein kinase, cAMP-dependent, regulatory, type II, beta                                                                     | 4.0                     | 1                       | 20                          |
| 2366948                  | FMO3        | 1    | flavin containing monooxygenase 3                                                                                             | 3.8                     | 1                       | 16                          |
| 3071957                  | KCP         | 7    | kielin/chordin-like protein                                                                                                   | 3.8                     | 1                       | 28                          |
| 3837782                  | GRIN2D      | 19   | glutamate receptor, ionotropic, N-methyl D-aspartate 2D                                                                       | 3.7                     | 1                       | 26                          |
| 3712272                  | LOC162632   | 17   | coiled-coil domain containing 144A                                                                                            | 3.7                     | 1                       | 8                           |
| 2811763                  | IPO11       | 5    | importin 11                                                                                                                   | 3.7                     | 1                       | 36                          |
| 2997354                  | EEPD1       | 7    | endonuclease/exonuclease/phosphatase family domain containing 1                                                               | 3.6                     | 1                       | 18                          |
| 3636993                  | NMB         | 15   | neuromedin B                                                                                                                  | 3.6                     | 1                       | 8                           |
| 2806472                  | IL7R        | 5    | interleukin 7 receptor                                                                                                        | 3.6                     | 2                       | 11                          |
| 2739863                  | ALPK1       | 4    | alpha-kinase 1                                                                                                                | 3.6                     | 1                       | 21                          |
| 2771750                  | UBA6        | 4    | ubiquitin-like modifier activating enzyme 6                                                                                   | 3.6                     | 2                       | 44                          |
| 2319650                  | UBE4B       | 1    | ubiquitination factor E4B (UFD2 homolog, yeast)                                                                               | 3.6                     | 1                       | 43                          |
| 3568684                  | MAX         | 14   | MYC associated factor X                                                                                                       | 3.5                     | 1                       | 19                          |
| 3031645                  | TMEM176A    | 7    | transmembrane protein 176A                                                                                                    | 3.5                     | 3                       | 7                           |
| 3964071                  | CELSR1      | 22   | cadherin, EGF LAG seven-pass G-type receptor 1 (flamingo homolog, <i>Drosophila</i> )                                         | 3.5                     | 1                       | 41                          |
| 2780559                  | PPA2        | 4    | pyrophosphatase (inorganic) 2                                                                                                 | 3.4                     | 1                       | 17                          |
| 2880419                  | JAKMIP2     | 5    | janus kinase and microtubule interacting protein 2                                                                            | 3.4                     | 1                       | 29                          |
| 3540373                  | CHURC1      | 14   | churchill domain containing 1                                                                                                 | 3.4                     | 1                       | 8                           |
| 2784694                  | ANKRD50     | 4    | ankyrin repeat domain 50                                                                                                      | 3.3                     | 1                       | 5                           |
| 4053054                  | KIR2DS1     | 19   | killer cell immunoglobulin-like receptor, two domains, short cytoplasmic tail, 1 acyl-CoA synthetase long-chain family member | 3.3                     | 2                       | 18                          |
| 2796582                  | ACSL1       | 4    | 1                                                                                                                             | 3.3                     | 1                       | 27                          |
| 3364450                  | SOX6        | 11   | SRY (sex determining region Y)-box 6                                                                                          | 3.3                     | 1                       | 23                          |
| 3791968                  | SERPINB10   | 18   | serpin peptidase inhibitor, clade B (ovalbumin), member 10                                                                    | 3.3                     | 2                       | 8                           |
| 3484645                  | BRCA2       | 13   | breast cancer 2, early onset                                                                                                  | 3.2                     | 1                       | 39                          |
| 3622029                  | SPG11       | 15   | spastic paraplegia 11 (autosomal recessive)                                                                                   | 3.2                     | 1                       | 56                          |
| 3018659                  | CBLL1       | 7    | Cas-Br-M (murine) ecotropic retroviral transforming sequence-like 1                                                           | 3.2                     | 1                       | 9                           |
| 2343481                  | IFI44L      | 1    | interferon-induced protein 44-like                                                                                            | 3.2                     | 2                       | 16                          |
| 3470619                  | SSH1        | 12   | slingshot homolog 1 ( <i>Drosophila</i> )                                                                                     | 3.2                     | 1                       | 24                          |
| 2409018                  | LEPRE1      | 1    | leucine proline-enriched proteoglycan (leprecan) 1                                                                            | 3.2                     | 1                       | 31                          |



| Probeset ID <sup>a</sup> | Gene symbol | Chr. | Description                                    | F(subject) <sup>b</sup> | Det. exons <sup>c</sup> | Tot. no. exons <sup>d</sup> |
|--------------------------|-------------|------|------------------------------------------------|-------------------------|-------------------------|-----------------------------|
|                          |             |      | ADAM metallopeptidase domain 6                 |                         |                         |                             |
| 3581945                  | IGHA1       | 14   | (pseudogene)                                   | 3.2                     | 1                       | 16                          |
| 3083057                  | MYOM2       | 8    | myomesin (M-protein) 2, 165kDa                 | 3.1                     | 4                       | 39                          |
| 3867866                  | PIH1D1      | 19   | PIH1 domain containing 1                       | 3.1                     | 1                       | 13                          |
| 3142987                  | CA1         | 8    | carbonic anhydrase I                           | 3.1                     | 2                       | 13                          |
| 3562789                  | C14orf106   | 14   | chromosome 14 open reading frame 106           | 3.1                     | 1                       | 25                          |
| 3894747                  | SIRPB1      | 20   | signal-regulatory protein beta 1               | 3.0                     | 1                       | 22                          |
| 2326663                  | ARID1A      | 1    | AT rich interactive domain 1A (SWI-like)       | 3.0                     | 1                       | 41                          |
| 2897185                  | RNF144B     | 6    | ring finger protein 144B                       | 2.9                     | 1                       | 19                          |
| 3203108                  | DDX58       | 9    | DEAD (Asp-Glu-Ala-Asp) box polypeptide 58      | 2.8                     | 1                       | 24                          |
|                          |             |      | interferon induced transmembrane protein 3 (1- |                         |                         |                             |
| 3357845                  | IFITM3      | 11   | 8U)                                            | 2.7                     | 1                       | 6                           |
| 3031598                  | GIMAP5      | 7    | GTPase, IMAP family member 5                   | 2.7                     | 1                       | 14                          |
|                          |             |      | neighbor of BRCA1 gene 2 (non-protein          |                         |                         |                             |
|                          |             |      | coding)                                        |                         |                         |                             |
| 3722404                  | NBR2        | 17   |                                                | 2.7                     | 1                       | 9                           |
| 2808452                  | NNT         | 5    | nicotinamide nucleotide transhydrogenase       | 2.7                     | 1                       | 29                          |
| 4009861                  | ALAS2       | X    | aminolevulinate, delta-, synthase 2            | 2.7                     | 3                       | 16                          |
| 3998312                  | NLGN4X      | X    | neuroligin 4, X-linked                         | 2.6                     | 1                       | 27                          |
| 2555374                  | USP34       | 2    | ubiquitin specific peptidase 34                | 2.6                     | 1                       | 90                          |
| 3810462                  | CPLX4       | 18   | complexin 4                                    | 2.6                     | 1                       | 6                           |
| 3221556                  | CDC26       | 9    | cell division cycle 26 homolog (S. cerevisiae) | 2.6                     | 1                       | 9                           |
| 3982481                  | PGK1        | X    | phosphoglycerate kinase 1                      | 2.6                     | 1                       | 13                          |
| 3906229                  | CHD6        | 20   | chromodomain helicase DNA binding protein 6    | 2.5                     | 1                       | 46                          |
|                          |             |      | leukocyte immunoglobulin-like receptor,        |                         |                         |                             |
|                          |             |      | subfamily B (with TM and ITIM domains),        |                         |                         |                             |
|                          |             |      | member 3                                       |                         |                         |                             |
| 3870667                  | LILRA3      | 19   |                                                | 2.5                     | 2                       | 16                          |
| 3297673                  | DYDC1       | 10   | DPY30 domain containing 1                      | 2.5                     | 1                       | 8                           |
| 3242887                  | ANKRD30A    | 10   | ankyrin repeat domain 30A                      | 2.5                     | 1                       | 39                          |
| 2915517                  | CYB5R4      | 6    | cytochrome b5 reductase 4                      | 2.5                     | 1                       | 19                          |
| 2427041                  | SORT1       | 1    | sortilin 1                                     | 2.5                     | 1                       | 36                          |
|                          |             |      | amyloid beta (A4) precursor protein-binding,   |                         |                         |                             |
|                          |             |      | family B, member 2                             |                         |                         |                             |
| 2766968                  | APBB2       | 4    |                                                | 2.5                     | 1                       | 20                          |
| 4045792                  | SFRS13A     | 1    | splicing factor, arginine/serine-rich 13A      | 2.5                     | 1                       | 36                          |
| 3698112                  | PMFBP1      | 16   | polyamine modulated factor 1 binding protein 1 | 2.5                     | 1                       | 31                          |
| 2867452                  | MCTP1       | 5    | multiple C2 domains, transmembrane 1           | 2.5                     | 1                       | 35                          |
| 2560208                  | PCGF1       | 2    | polycomb group ring finger 1                   | 2.5                     | 1                       | 12                          |
|                          |             |      | TAF4 RNA polymerase II, TATA box binding       |                         |                         |                             |
|                          |             |      | protein (TBP)-associated factor, 135kDa        |                         |                         |                             |
| 3912772                  | TAF4        | 20   |                                                | 2.4                     | 1                       | 34                          |
| 2340970                  | IL12RB2     | 1    | interleukin 12 receptor, beta 2                | 2.4                     | 1                       | 27                          |
|                          |             |      | DnaJ (Hsp40) homolog, subfamily C, member      |                         |                         |                             |
|                          |             |      | 7                                              |                         |                         |                             |
| 3757509                  | DNAJC7      | 17   |                                                | 2.4                     | 1                       | 16                          |
| 2555646                  | CCT4        | 2    | chaperonin containing TCP1, subunit 4 (delta)  | 2.4                     | 1                       | 22                          |
| 3942821                  | RNF185      | 22   | ring finger protein 185                        | 2.4                     | 1                       | 15                          |
|                          |             |      | N(alpha)-acetyltransferase 35, NatC auxiliary  |                         |                         |                             |
|                          |             |      | subunit                                        |                         |                         |                             |
| 3177577                  | NAA35       | 9    |                                                | 2.4                     | 1                       | 25                          |
| 3746956                  | NCOR1       | 17   | nuclear receptor co-repressor 1                | 2.3                     | 1                       | 64                          |
| 3122764                  | DEFA3       | 8    | defensin, alpha 3, neutrophil-specific         | 2.3                     | 4                       | 12                          |
| 3760307                  | ARL17A      | 17   | ADP-ribosylation factor-like 17A               | 2.3                     | 2                       | 17                          |
| 3575689                  | FOXN3       | 14   | forkhead box N3                                | 2.3                     | 1                       | 24                          |
|                          |             |      | intraflagellar transport 57 homolog            |                         |                         |                             |
|                          |             |      | (Chlamydomonas)                                |                         |                         |                             |
| 2687855                  | IFT57       | 3    |                                                | 2.3                     | 1                       | 17                          |
|                          |             |      | ADAM metallopeptidase domain 6                 |                         |                         |                             |
|                          |             |      | (pseudogene)                                   |                         |                         |                             |
| 3582206                  | IGHM        | 14   |                                                | 2.3                     | 1                       | 31                          |
| 3667875                  | HP          | 16   | haptoglobin                                    | 2.3                     | 1                       | 18                          |
| 2871046                  | EPB41L4A    | 5    | erythrocyte membrane protein band 4.1 like 4A  | 2.3                     | 1                       | 28                          |
| 3421956                  | CNOT2       | 12   | CCR4-NOT transcription complex, subunit 2      | 2.3                     | 1                       | 26                          |
| 3449602                  | OVOS2       | 12   | ovostatin 2                                    | 2.2                     | 2                       | 16                          |

| Probeset ID <sup>a</sup> | Gene symbol  | Chr. | Description                                                                                                                 | F(subject) <sub>b</sub> | Det. exons <sup>c</sup> | Tot. no. exons <sup>d</sup> |
|--------------------------|--------------|------|-----------------------------------------------------------------------------------------------------------------------------|-------------------------|-------------------------|-----------------------------|
| 3686388                  | XPO6         | 16   | exportin 6                                                                                                                  | 2.2                     | 1                       | 27                          |
| 3466657                  | CCDC38       | 12   | coiled-coil domain containing 38<br>ATG4 autophagy related 4 homolog C (S. cerevisiae)                                      | 2.2                     | 1                       | 18                          |
| 2339516                  | ATG4C        | 1    |                                                                                                                             | 2.2                     | 1                       | 17                          |
| 2914020                  | SENP6        | 6    | SUMO1/sentrin specific peptidase 6                                                                                          | 2.2                     | 1                       | 29                          |
| 3262456                  | SLK          | 10   | STE20-like kinase (yeast)                                                                                                   | 2.2                     | 1                       | 27                          |
| 2878681                  | DIAPH1       | 5    | diaphanous homolog 1 (Drosophila)                                                                                           | 2.2                     | 1                       | 33                          |
| 2393717                  | LRRC47       | 1    | leucine rich repeat containing 47                                                                                           | 2.2                     | 1                       | 13                          |
| 2400328                  | HP1BP3       | 1    | heterochromatin protein 1, binding protein 3                                                                                | 2.2                     | 1                       | 18                          |
| 2694003                  | MGLL         | 3    | monoglyceride lipase                                                                                                        | 2.2                     | 1                       | 18                          |
| 3558349                  | CTSG         | 14   | cathepsin G                                                                                                                 | 2.1                     | 1                       | 7                           |
| 3108508                  | LAPTM4B      | 8    | lysosomal protein transmembrane 4 beta<br>WW domain containing E3 ubiquitin protein                                         | 2.1                     | 1                       | 12                          |
| 3105846                  | WWP1         | 8    | ligase 1                                                                                                                    | 2.1                     | 1                       | 35                          |
| 2857150                  | DHX29        | 5    | DEAH (Asp-Glu-Ala-His) box polypeptide 29                                                                                   | 2.1                     | 1                       | 31                          |
| 2672153                  | LTF          | 3    | lactotransferrin                                                                                                            | 2.1                     | 1                       | 20                          |
| 2426573                  | SLC25A24     | 1    | solute carrier family 25 (mitochondrial carrier; phosphate carrier), member 24                                              | 2.1                     | 1                       | 16                          |
| 2831308                  | UBE2D2       | 5    | ubiquitin-conjugating enzyme E2D 2 (UBC4/5 homolog, yeast)<br>protein phosphatase 2, regulatory subunit B', epsilon isoform | 2.1                     | 1                       | 14                          |
| 3568036                  | PPP2R5E      | 14   |                                                                                                                             | 2.1                     | 1                       | 20                          |
| 2609582                  | THUMPD3      | 3    | THUMP domain containing 3                                                                                                   | 2.1                     | 1                       | 17                          |
| 2735093                  | DSPP         | 4    | dentin sialophosphoprotein                                                                                                  | 2.1                     | 1                       | 22                          |
| 3819584                  | HNRNPM       | 19   | heterogeneous nuclear ribonucleoprotein M                                                                                   | 2.0                     | 1                       | 28                          |
| 2951603                  | FKBP5        | 6    | FK506 binding protein 5                                                                                                     | 2.0                     | 1                       | 19                          |
| 3826614                  | ZNF493       | 19   | zinc finger protein 493                                                                                                     | 2.0                     | 1                       | 17                          |
| 3057380                  | HIP1         | 7    | huntingtin interacting protein 1                                                                                            | 2.0                     | 1                       | 38                          |
| 3581738                  | LOC100290146 | 14   | ADAM metallopeptidase domain 6<br>(pseudogene)                                                                              | 2.0                     | 1                       | 7                           |

<sup>a</sup>ID of the probeset of the gene with the highest F statistics.

<sup>b</sup>F statistics of the top probeset of the gene

<sup>c</sup>Number of exons of the gene with  $\geq 2$  F statistics

<sup>d</sup>Total number of exons of the gene in the annotation

Supplementary Table 12. Some genes that are stable across three tissue types and across participants.

| Transcript<br>Cluster ID | Gene Symbol  | Chr. | Description                                                                        | Grand<br>mean <sup>a</sup> | P(RNA<br>source) <sup>b</sup> | P(Subject) <sup>c</sup> | Max.<br>FC <sup>d</sup> | Subject<br>SD <sup>e</sup> |
|--------------------------|--------------|------|------------------------------------------------------------------------------------|----------------------------|-------------------------------|-------------------------|-------------------------|----------------------------|
| 2320472                  | CLCN6        | 1    | chloride channel 6                                                                 | 8.77                       | 0.96                          | 0.53                    | 1.01                    | 0.16                       |
| 2951500                  | TEAD3        | 6    | TEA domain family member 3                                                         | 6.23                       | 0.93                          | 0.23                    | 1.02                    | 0.15                       |
| 3359881                  | ART5         | 11   | ADP-ribosyltransferase 5<br>chromosome 17 open reading                             | 6.10                       | 0.94                          | 0.85                    | 1.02                    | 0.15                       |
| 3770512                  | C17orf28     | 17   | frame 28<br>cytochrome c oxidase subunit                                           | 6.79                       | 0.94                          | 0.43                    | 1.02                    | 0.16                       |
| 3688362                  | COX6A2       | 16   | Via polypeptide 2                                                                  | 7.79                       | 0.95                          | 0.23                    | 1.02                    | 0.22                       |
| 3986412                  | LOC100293553 | X    | similar to L-myc-2 protein                                                         | 4.54                       | 0.97                          | 0.81                    | 1.02                    | 0.20                       |
| 3840952                  | ZNF331       | 19   | zinc finger protein 331<br>sirtuin (silent mating type<br>information regulation 2 | 5.84                       | 0.97                          | 0.92                    | 1.02                    | 0.21                       |
| 2895650                  | SIRT5        | 6    | homolog) 5 ( <i>S. cerevisiae</i> )                                                | 7.06                       | 0.92                          | 0.73                    | 1.02                    | 0.15                       |
| 3552344                  | FLJ41170     | 14   | hypothetical LOC440200                                                             | 5.18                       | 0.98                          | 0.27                    | 1.02                    | 0.40                       |
| 3064204                  | ACTL6B       | 7    | actin-like 6B                                                                      | 6.36                       | 0.92                          | 0.48                    | 1.02                    | 0.18                       |
| 3994964                  | GPR50        | X    | G protein-coupled receptor 50                                                      | 4.73                       | 0.94                          | 0.28                    | 1.02                    | 0.24                       |
| 3839489                  | GPR32        | 19   | G protein-coupled receptor 32                                                      | 5.28                       | 0.96                          | 0.71                    | 1.02                    | 0.25                       |
| 3554104                  | KIF26A       | 14   | kinesin family member 26A                                                          | 5.09                       | 0.92                          | 0.30                    | 1.02                    | 0.23                       |
| 3715935                  | PIPOX        | 17   | pipecolic acid oxidase                                                             | 5.31                       | 0.88                          | 0.78                    | 1.02                    | 0.14                       |
| 3268548                  | PSTK         | 10   | phosphoseryl-tRNA kinase<br>RAB8B, member RAS oncogene                             | 5.79                       | 0.90                          | 0.55                    | 1.02                    | 0.17                       |
| 3597476                  | RAB8B        | 15   | family<br>cytochrome P450, family 4,                                               | 10.72                      | 0.83                          | 0.20                    | 1.02                    | 0.18                       |
| 2334932                  | CYP4B1       | 1    | subfamily B, polypeptide 1<br>SAM pointed domain containing                        | 5.53                       | 0.82                          | 0.54                    | 1.02                    | 0.13                       |
| 2951191                  | SPDEF        | 6    | ets transcription factor                                                           | 6.30                       | 0.85                          | 0.22                    | 1.03                    | 0.20                       |
| 3873824                  | TMC2         | 20   | transmembrane channel-like 2                                                       | 4.81                       | 0.62                          | 0.62                    | 1.03                    | 0.10                       |
| 3567970                  | GPHB5        | 14   | glycoprotein hormone beta 5<br>chromosome 20 open reading                          | 6.53                       | 0.92                          | 0.55                    | 1.03                    | 0.26                       |
| 3882413                  | C20orf114    | 20   | frame 114<br>XK, Kell blood group complex<br>subunit-related family, member        | 4.85                       | 0.70                          | 0.24                    | 1.03                    | 0.15                       |
| 3122631                  | XKR5         | 8    | 5<br>chromosome 22 open reading                                                    | 5.36                       | 0.80                          | 0.22                    | 1.03                    | 0.18                       |
| 3952703                  | C22orf39     | 22   | frame 39<br>leucine rich repeat                                                    | 7.82                       | 0.71                          | 0.63                    | 1.03                    | 0.13                       |
| 3249369                  | LRRTM3       | 10   | transmembrane neuronal 3<br>cell division cycle 37 homolog                         | 5.32                       | 0.86                          | 0.67                    | 1.03                    | 0.17                       |
| 3850331                  | CDC37        | 19   | ( <i>S. cerevisiae</i> )                                                           | 9.36                       | 0.69                          | 0.23                    | 1.03                    | 0.14                       |
| 2708203                  | MAP6D1       | 3    | MAP6 domain containing 1                                                           | 7.02                       | 0.84                          | 0.67                    | 1.03                    | 0.20                       |
| 3838845                  | CPT1C        | 19   | carnitine palmitoyltransferase 1C                                                  | 6.07                       | 0.80                          | 0.26                    | 1.03                    | 0.19                       |
| 3959203                  | RBM9         | 22   | RNA binding motif protein 9<br>neurotrophic tyrosine kinase,                       | 5.90                       | 0.70                          | 0.21                    | 1.04                    | 0.18                       |
| 3637818                  | NTRK3        | 15   | receptor, type 3<br>chromosome 10 open reading                                     | 4.21                       | 0.44                          | 0.41                    | 1.04                    | 0.12                       |
| 3231835                  | C10orf110    | 10   | frame 110<br>family with sequence similarity                                       | 4.59                       | 0.85                          | 0.94                    | 1.04                    | 0.20                       |
| 3509910                  | FAM48A       | 13   | 48, member A                                                                       | 9.46                       | 0.53                          | 0.31                    | 1.04                    | 0.14                       |

<sup>a</sup>Grand mean across three RNA sources > 4.0

<sup>b,c</sup> p > 0.2

<sup>d</sup>Maximum fold change across three RNA source

<sup>e</sup>Standard deviation of the subject effects

Supplementary Table 13. Key quality control parameters for 140 samples.

| ID              | LCL                       |            |                                  |                       | PAX                       |            |                                  |                       | PBMIC                     |            |                                  |                       |
|-----------------|---------------------------|------------|----------------------------------|-----------------------|---------------------------|------------|----------------------------------|-----------------------|---------------------------|------------|----------------------------------|-----------------------|
|                 | All<br>probeset<br>t mean | PM<br>Mean | All<br>probeset<br>t RLE<br>mean | Pos vs.<br>neg<br>AUC | All<br>probeset<br>t mean | PM<br>Mean | All<br>probeset<br>t RLE<br>mean | Pos vs.<br>neg<br>AUC | All<br>probeset<br>t mean | PM<br>Mean | All<br>probeset<br>t RLE<br>mean | Pos vs.<br>neg<br>AUC |
| 1               | 6.33                      | 140.68     | 0.43                             | 0.90                  | 5.68                      | 164.57     | 0.31                             | 0.82                  | 6.02                      | 122.12     | 0.38                             | 0.85                  |
| 2 <sup>a</sup>  | 6.27                      | 113.52     | 0.46                             | 0.90                  | 5.63                      | 175.36     | 0.34                             | 0.82                  | 6.04                      | 171.46     | 0.34                             | 0.85                  |
| 3               | 6.28                      | 155.07     | 0.36                             | 0.91                  | 5.66                      | 158.84     | 0.31                             | 0.82                  | 6.06                      | 130.52     | 0.35                             | 0.87                  |
| 4               | 6.23                      | 141.39     | 0.36                             | 0.90                  | 5.67                      | 166.57     | 0.36                             | 0.82                  | 6.20                      | 166.37     | 0.42                             | 0.88                  |
| 5               | 6.25                      | 139.04     | 0.34                             | 0.90                  | 5.65                      | 143.13     | 0.35                             | 0.81                  | 5.99                      | 115.45     | 0.39                             | 0.86                  |
| 6               | 6.27                      | 147.10     | 0.43                             | 0.90                  | 5.72                      | 166.45     | 0.45                             | 0.82                  | 6.00                      | 102.58     | 0.41                             | 0.87                  |
| 7               | 6.24                      | 125.64     | 0.41                             | 0.89                  | 5.73                      | 153.13     | 0.43                             | 0.83                  | 6.02                      | 116.46     | 0.42                             | 0.86                  |
| 8 <sup>a</sup>  | 6.17                      | 136.99     | 0.44                             | 0.89                  | 5.58                      | 143.97     | 0.37                             | 0.81                  | 6.19                      | 146.71     | 0.43                             | 0.88                  |
| 9               | 6.29                      | 177.56     | 0.31                             | 0.90                  | 5.65                      | 146.20     | 0.35                             | 0.82                  | 6.28                      | 213.07     | 0.52                             | 0.88                  |
| 10              | 6.15                      | 123.64     | 0.50                             | 0.88                  | 5.57                      | 120.62     | 0.42                             | 0.80                  | 6.09                      | 113.19     | 0.47                             | 0.86                  |
| 11              | 6.15                      | 124.30     | 0.45                             | 0.89                  | 5.62                      | 129.75     | 0.38                             | 0.81                  | 6.21                      | 155.90     | 0.42                             | 0.89                  |
| 12              | 6.22                      | 160.17     | 0.40                             | 0.90                  | 5.56                      | 118.20     | 0.45                             | 0.80                  | 6.27                      | 178.31     | 0.49                             | 0.89                  |
| 13              | 6.32                      | 197.80     | 0.37                             | 0.89                  | 5.62                      | 144.18     | 0.39                             | 0.81                  | 6.20                      | 205.14     | 0.38                             | 0.88                  |
| 14              | 6.37                      | 206.14     | 0.43                             | 0.90                  | 5.63                      | 155.02     | 0.35                             | 0.80                  | 5.96                      | 143.38     | 0.41                             | 0.86                  |
| 15              | 6.34                      | 179.21     | 0.39                             | 0.89                  | 5.73                      | 176.85     | 0.42                             | 0.83                  | 6.02                      | 157.27     | 0.34                             | 0.86                  |
| 16              | 6.24                      | 169.70     | 0.39                             | 0.89                  | 5.63                      | 138.49     | 0.40                             | 0.81                  | 5.98                      | 133.38     | 0.37                             | 0.86                  |
| 17              | 6.23                      | 196.85     | 0.39                             | 0.89                  | 5.71                      | 209.16     | 0.40                             | 0.82                  | 6.18                      | 259.06     | 0.36                             | 0.87                  |
| 18              | 6.31                      | 189.93     | 0.37                             | 0.89                  | 5.63                      | 219.86     | 0.30                             | 0.81                  | 6.06                      | 240.33     | 0.32                             | 0.88                  |
| 19              | 6.32                      | 242.02     | 0.27                             | 0.90                  | 5.61                      | 211.51     | 0.35                             | 0.81                  | 6.22                      | 231.42     | 0.43                             | 0.88                  |
| 20              | 6.25                      | 246.33     | 0.31                             | 0.90                  | 5.67                      | 179.40     | 0.34                             | 0.82                  | 6.17                      | 188.69     | 0.37                             | 0.88                  |
| 22              | 6.38                      | 229.44     | 0.40                             | 0.91                  | 5.63                      | 169.63     | 0.36                             | 0.81                  | 6.20                      | 203.42     | 0.44                             | 0.88                  |
| 24              | 6.16                      | 205.42     | 0.43                             | 0.90                  | 5.66                      | 242.93     | 0.34                             | 0.82                  | 6.16                      | 227.32     | 0.35                             | 0.88                  |
| 25              | 6.30                      | 334.12     | 0.34                             | 0.90                  | 5.61                      | 190.92     | 0.36                             | 0.81                  | 5.98                      | 191.26     | 0.36                             | 0.87                  |
| 26              | 5.96                      | 221.71     | 0.66                             | 0.88                  | 5.63                      | 224.18     | 0.30                             | 0.82                  | 6.16                      | 239.11     | 0.34                             | 0.89                  |
| 27              | 6.06                      | 229.29     | 0.55                             | 0.88                  | 5.66                      | 256.18     | 0.29                             | 0.82                  | 6.03                      | 223.60     | 0.36                             | 0.88                  |
| 28              | 6.31                      | 328.28     | 0.28                             | 0.90                  | 5.62                      | 220.94     | 0.29                             | 0.81                  | 6.19                      | 295.34     | 0.35                             | 0.88                  |
| 29              | 6.34                      | 366.36     | 0.29                             | 0.90                  | 5.65                      | 206.54     | 0.30                             | 0.81                  | 6.13                      | 211.38     | 0.39                             | 0.87                  |
| 30              | 6.36                      | 362.74     | 0.42                             | 0.90                  | 5.65                      | 215.49     | 0.32                             | 0.81                  | 6.23                      | 224.78     | 0.46                             | 0.88                  |
| 31              | 6.21                      | 334.93     | 0.31                             | 0.89                  | 5.57                      | 193.36     | 0.35                             | 0.80                  | 6.15                      | 259.41     | 0.34                             | 0.89                  |
| 32              | 6.29                      | 367.30     | 0.34                             | 0.89                  | 5.65                      | 230.79     | 0.32                             | 0.81                  | 6.40                      | 353.21     | 0.63                             | 0.90                  |
| 33              | 6.22                      | 268.57     | 0.34                             | 0.90                  | 5.50                      | 166.21     | 0.53                             | 0.79                  | 6.05                      | 287.00     | 0.36                             | 0.87                  |
| 34              | 6.30                      | 230.65     | 0.31                             | 0.90                  | 5.61                      | 223.89     | 0.31                             | 0.81                  | 6.13                      | 190.64     | 0.38                             | 0.88                  |
| 36              | 6.26                      | 210.76     | 0.32                             | 0.89                  | 5.57                      | 150.39     | 0.40                             | 0.80                  | 5.81                      | 217.58     | 0.50                             | 0.84                  |
| 37              | 6.35                      | 215.27     | 0.36                             | 0.90                  | 5.45                      | 150.94     | 0.51                             | 0.78                  | 5.46                      | 224.12     | 0.88                             | 0.79                  |
| 38 <sup>b</sup> | 6.31                      | 227.32     | 0.43                             | 0.89                  | 5.65                      | 180.00     | 0.38                             | 0.81                  | 5.42                      | 164.48     | 0.92                             | 0.79                  |
| 39 <sup>b</sup> | 6.33                      | 219.85     | 0.41                             | 0.90                  | 5.65                      | 195.49     | 0.37                             | 0.82                  | 5.98                      | 192.67     | 0.45                             | 0.85                  |
| 40              | 6.38                      | 247.91     | 0.40                             | 0.89                  | 5.55                      | 149.03     | 0.44                             | 0.80                  | 5.36                      | 181.78     | 1.00                             | 0.77                  |
| 41 <sup>b</sup> | 6.33                      | 201.09     | 0.34                             | 0.90                  | 5.58                      | 169.93     | 0.38                             | 0.80                  | 5.40                      | 146.09     | 0.95                             | 0.78                  |
| 42 <sup>a</sup> | 6.29                      | 216.53     | 0.34                             | 0.88                  | 5.63                      | 155.40     | 0.34                             | 0.81                  | 5.46                      | 174.00     | 0.88                             | 0.79                  |
| 43 <sup>a</sup> | 6.25                      | 204.94     | 0.34                             | 0.90                  | 5.75                      | 208.70     | 0.38                             | 0.84                  | 6.06                      | 171.61     | 0.47                             | 0.86                  |
| 44 <sup>a</sup> | 6.34                      | 255.79     | 0.29                             | 0.90                  | 5.72                      | 209.89     | 0.39                             | 0.83                  | 5.53                      | 248.37     | 0.78                             | 0.80                  |
| 45 <sup>c</sup> |                           |            |                                  |                       | 5.63                      | 192.80     | 0.32                             | 0.81                  | 5.59                      | 182.91     | 0.72                             | 0.81                  |
| 46 <sup>b</sup> | 6.24                      | 218.92     | 0.30                             | 0.90                  | 5.47                      | 232.70     | 0.43                             | 0.79                  | 5.53                      | 197.73     | 0.79                             | 0.80                  |
| 47 <sup>b</sup> | 5.99                      | 130.30     | 0.88                             | 0.85                  | 5.65                      | 213.31     | 0.31                             | 0.82                  | 5.28                      | 204.52     | 1.08                             | 0.77                  |
| 48              | 6.24                      | 254.16     | 0.31                             | 0.90                  | 5.62                      | 229.41     | 0.39                             | 0.81                  | 5.69                      | 194.35     | 0.62                             | 0.83                  |
| 49              | 5.95                      | 256.91     | 0.67                             | 0.88                  | 5.61                      | 191.59     | 0.33                             | 0.81                  | 5.66                      | 247.55     | 0.69                             | 0.82                  |
| 50              | 6.00                      | 300.80     | 0.61                             | 0.88                  | 5.49                      | 188.68     | 0.49                             | 0.78                  | 5.82                      | 236.93     | 0.43                             | 0.83                  |
| Min             | 5.95                      | 113.52     | 0.27                             | 0.85                  | 5.45                      | 118.20     | 0.29                             | 0.78                  | 5.28                      | 102.58     | 0.32                             | 0.77                  |
| Max             | 6.38                      | 367.30     | 0.88                             | 0.91                  | 5.75                      | 256.18     | 0.53                             | 0.84                  | 6.40                      | 353.21     | 1.08                             | 0.90                  |

<sup>a</sup>Mislabeled samples

<sup>b</sup>Samples with all probeset RLE mean > 0.75

<sup>c</sup>Incomplete sample

Supplementary Table 14. Post-correction deflation rate (a one unit difference in  $\log_2$  RMA value in the original data).

| Correction method | PAX vs. LCL | PBMC vs. LCL | PBMC vs. PAX |
|-------------------|-------------|--------------|--------------|
| QPN               | 0.9581      | 0.9718       | 0.9734       |
| S10               | 0.8797      | 0.8855       | 0.8898       |
